# Supplementary material for: Comprehensive analysis of macrophage-related multigene signature in the tumor microenvironment of head and neck squamous cancer
Source: Aging (Albany NY). 2021 Feb 11;13(4):5718–47. doi: 10.18632/aging.202499 (PMC7950226; doi:10.18632/aging.202499)
Supplement: Supplementary Table 6 [file aging-13-202499-s005.xlsx]

## Sheet: fancecell - 副本
Supplementary Table 6. The scoring data of 33 kinds of immune cells are based on the results of ESTIMATE calculation.
id	FANCE	group	Activated CD8 T cell	Central memory CD8 T cell	Effector memeory CD8 T cell	Activated CD4 T cell	Central memory CD4 T cell	Effector memeory CD4 T cell	T follicular helper cell	Gamma delta T cell	Type 1 T helper cell	Type 17 T helper cell	Type 2 T helper cell	Regulatory T cell	Activated B cell	Immature B cell	Memory B cell	Natural killer cell	CD56bright natural killer cell	CD56dim natural killer cell	Myeloid derived suppressor cell	Natural killer T cell	Activated dendritic cell	Plasmacytoid dendritic cell	Immature dendritic cell	Macrophage	Eosinophil	Mast cell	Monocyte	Neutrophil	HCK	MHC.II	LCK	STAT1	Interferon
TCGA-CV-6939-11A-01R-1915-07	1.33994	low-FANCE	0.435961	0.604914	0.441703	0.222583	0.742758	0.476436	0.423047	0.526327	0.413418	0.281845	0.382009	0.423213	0.147042	0.21169	0.338628	0.566622	0.536625	0.573068	0.482297	0.385284	0.454797	0.673454	0.601966	0.299317	0.249838	0.376125	0.641072	0.0815203	0.502606	0.594159	0.292192	0.448554	0.52506
TCGA-CV-7091-11A-01R-2016-07	1.38641	low-FANCE	0.46672	0.599232	0.498089	0.253312	0.737854	0.500807	0.41575	0.525169	0.441808	0.288536	0.370514	0.426665	0.113637	0.21896	0.355821	0.573505	0.524682	0.560152	0.499002	0.40189	0.447067	0.652885	0.607535	0.309907	0.289439	0.4627	0.634124	0.132608	0.495903	0.582155	0.33795	0.598753	0.597872
TCGA-CV-6933-11A-01R-1915-07	1.52986	low-FANCE	0.534627	0.585521	0.418395	0.244434	0.709594	0.416356	0.38434	0.451964	0.396953	0.27005	0.412711	0.27886	0.198239	0.304334	0.358703	0.508397	0.510984	0.565613	0.486779	0.325615	0.457858	0.665934	0.613075	0.257953	0.234	0.253798	0.673765	0.0313086	0.403735	0.635616	0.347241	0.599821	0.668689
TCGA-IQ-A61O-01A-11R-A30B-07	1.71811	low-FANCE	0.486435	0.609607	0.50748	0.470316	0.790488	0.500574	0.510695	0.570359	0.469935	0.237228	0.420738	0.578829	0.141002	0.296736	0.380757	0.607301	0.547764	0.660041	0.656952	0.454291	0.524109	0.633637	0.607047	0.445252	0.279421	0.348848	0.613126	0.16222	0.692967	0.686989	0.446769	0.649696	0.611372
TCGA-HD-A6I0-11A-11R-A31N-07	1.96278	low-FANCE	0.653887	0.649279	0.543888	0.471299	0.77096	0.491339	0.530979	0.639019	0.503743	0.337858	0.389444	0.517229	0.290017	0.297547	0.354175	0.585983	0.605705	0.631372	0.723173	0.443171	0.561249	0.670491	0.669205	0.48882	0.35799	0.55004	0.684171	0.464761	0.691419	0.691512	0.619916	0.590895	0.504705
TCGA-MT-A7BN-01A-12R-A34R-07	2.1796	low-FANCE	0.643282	0.610759	0.490781	0.501535	0.723556	0.431573	0.450337	0.596194	0.466468	0.317323	0.401656	0.53854	0.229009	0.25513	0.318101	0.53833	0.570474	0.627373	0.69764	0.420441	0.516956	0.635788	0.580078	0.398208	0.289094	0.446759	0.620828	0.167249	0.663262	0.636089	0.519971	0.719991	0.465911
TCGA-CV-7245-11A-01R-2016-07	2.21592	low-FANCE	0.461049	0.663651	0.509394	0.361891	0.775259	0.516708	0.512042	0.578125	0.465504	0.317374	0.389859	0.502941	0.112012	0.235223	0.385885	0.603146	0.558923	0.551358	0.553758	0.410718	0.481499	0.667213	0.641938	0.361827	0.309046	0.531033	0.592849	0.262895	0.588512	0.672451	0.360545	0.536377	0.484836
TCGA-CV-7434-11A-01R-2132-07	2.24235	low-FANCE	0.483137	0.624753	0.501855	0.339467	0.771601	0.426883	0.438174	0.515386	0.449439	0.29679	0.411413	0.396253	0.229276	0.262615	0.386782	0.573624	0.553491	0.60733	0.559745	0.400342	0.503926	0.671689	0.656909	0.323987	0.261601	0.406873	0.632337	0.166865	0.539504	0.673207	0.378064	0.682603	0.605375
TCGA-CV-7406-11A-01R-2081-07	2.32878	low-FANCE	0.459447	0.601021	0.453898	0.386722	0.736238	0.475042	0.42132	0.521715	0.430886	0.326595	0.421057	0.320044	0.163695	0.218474	0.318666	0.548136	0.593242	0.593915	0.494318	0.363158	0.491794	0.625366	0.63501	0.245366	0.33657	0.396508	0.596355	0.29985	0.364031	0.604687	0.30812	0.512297	0.45588
TCGA-H7-A6C4-11A-21R-A466-07	2.46973	low-FANCE	0.58139	0.583397	0.493535	0.441442	0.746149	0.485493	0.457195	0.527567	0.427795	0.307568	0.394814	0.323254	0.124138	0.204288	0.361831	0.515802	0.572926	0.587118	0.517699	0.335739	0.485619	0.630853	0.624988	0.250625	0.332693	0.422622	0.597103	0.271236	0.429764	0.569189	0.408475	0.682968	0.495246
TCGA-CV-7097-11A-01R-2016-07	2.55128	low-FANCE	0.568291	0.656516	0.50218	0.405646	0.784195	0.498252	0.497315	0.584043	0.495654	0.299135	0.411042	0.537018	0.296808	0.335754	0.354508	0.597686	0.584773	0.552515	0.650312	0.433335	0.526696	0.679028	0.65829	0.407406	0.313816	0.586304	0.646219	0.245388	0.701589	0.773758	0.52201	0.703347	0.554336
TCGA-CQ-6221-01A-11R-2081-07	2.58187	low-FANCE	0.475889	0.64323	0.495487	0.444327	0.765338	0.536988	0.424548	0.655149	0.442676	0.317265	0.450412	0.5236	0.0861942	0.23194	0.379949	0.580348	0.524096	0.585269	0.636748	0.435074	0.518699	0.638678	0.601829	0.432314	0.268593	0.415088	0.624826	0.182574	0.653298	0.668194	0.368901	0.625137	0.575891
TCGA-CV-7238-11A-01R-2016-07	2.66915	low-FANCE	0.466477	0.602416	0.457886	0.341852	0.734216	0.470635	0.466836	0.515104	0.427904	0.289017	0.396203	0.350255	0.169513	0.192497	0.374618	0.55501	0.590433	0.572627	0.530038	0.363127	0.502224	0.649043	0.624755	0.249573	0.218782	0.37173	0.603424	0.289154	0.400226	0.612265	0.339365	0.507111	0.397336
TCGA-CV-6436-01A-11R-1686-07	2.67175	low-FANCE	0.720187	0.605598	0.55362	0.537892	0.788446	0.471099	0.486353	0.637643	0.442274	0.335018	0.459216	0.475656	0.200238	0.264695	0.344502	0.516184	0.60253	0.576496	0.678034	0.415771	0.529132	0.616911	0.609659	0.36271	0.221282	0.330309	0.621276	0.397369	0.652565	0.713143	0.539623	0.941572	0.900279
TCGA-CN-6017-01A-11R-1686-07	2.7359	low-FANCE	0.733023	0.676462	0.636536	0.575627	0.818925	0.533019	0.529246	0.617746	0.541053	0.327299	0.460038	0.614728	0.410833	0.451116	0.406246	0.644656	0.577709	0.61449	0.777709	0.484978	0.586445	0.65018	0.659717	0.400005	0.340317	0.455178	0.645901	0.252108	0.775183	0.876281	0.723698	0.981901	0.934209
TCGA-CV-A45Q-01A-11R-A24H-07	2.82304	low-FANCE	0.579601	0.58595	0.45924	0.443431	0.724335	0.413629	0.417874	0.551605	0.392591	0.322836	0.40583	0.437493	0.0667167	0.19797	0.354719	0.49073	0.581342	0.567627	0.565934	0.396169	0.4979	0.592725	0.568928	0.324354	0.233674	0.335734	0.614503	0.408839	0.513594	0.497729	0.357936	0.831493	0.768467
TCGA-P3-A5QA-01A-11R-A28V-07	2.90445	low-FANCE	0.47816	0.607896	0.390119	0.502529	0.758863	0.499273	0.411947	0.529904	0.39682	0.273128	0.447435	0.444541	0.104374	0.176951	0.404	0.581102	0.601008	0.58249	0.447003	0.440581	0.488607	0.600835	0.591396	0.239777	0.225894	0.30921	0.601759	0.207573	0.316706	0.479049	0.292271	0.773551	0.698163
TCGA-CV-7235-11A-01R-2016-07	2.97748	low-FANCE	0.557188	0.647617	0.56837	0.455545	0.799885	0.481561	0.490015	0.569192	0.477884	0.303037	0.420183	0.559869	0.303638	0.374689	0.429337	0.611007	0.550918	0.586757	0.707347	0.434446	0.561477	0.685755	0.685611	0.430389	0.284012	0.40089	0.680231	0.218952	0.775513	0.859579	0.596	0.730734	0.582939
TCGA-CQ-7069-01A-11R-2403-07	3.00548	low-FANCE	0.412444	0.59492	0.450967	0.439347	0.767713	0.451129	0.439344	0.559097	0.40279	0.342117	0.428016	0.445037	0.148663	0.216834	0.388127	0.535002	0.610329	0.608773	0.48845	0.408654	0.503463	0.666751	0.585213	0.268979	0.258668	0.325346	0.606777	0.380835	0.391018	0.546738	0.353905	0.732154	0.856688
TCGA-CV-7432-11A-01R-2132-07	3.0164	low-FANCE	0.500049	0.597543	0.51062	0.292579	0.753788	0.42275	0.418716	0.496541	0.410682	0.296316	0.38691	0.39128	0.192096	0.281765	0.366528	0.554554	0.536868	0.596688	0.549975	0.371699	0.515515	0.666475	0.624717	0.338448	0.184771	0.262848	0.651578	0.115418	0.572153	0.684037	0.354968	0.611536	0.526187
TCGA-HD-A6HZ-11A-11R-A31N-07	3.18242	low-FANCE	0.509932	0.595062	0.509603	0.314247	0.707282	0.475848	0.446326	0.584089	0.38403	0.288715	0.329118	0.409245	0.1248	0.140615	0.345402	0.52885	0.586747	0.635307	0.53794	0.35868	0.471865	0.642387	0.608597	0.382306	0.197817	0.397912	0.615162	0.250771	0.512253	0.482672	0.307772	0.487999	0.491755
TCGA-CV-5971-01A-11R-1686-07	3.41166	low-FANCE	0.631077	0.662521	0.546104	0.49871	0.80133	0.54666	0.496353	0.602021	0.510978	0.278197	0.441534	0.564152	0.236653	0.338362	0.416005	0.628418	0.602921	0.6376	0.694111	0.429339	0.533895	0.655462	0.667029	0.398394	0.30195	0.482719	0.642254	0.180746	0.680693	0.761975	0.614744	0.861587	0.6961
TCGA-CR-7376-01A-11R-2132-07	3.55347	low-FANCE	0.704377	0.684395	0.637535	0.606659	0.823899	0.540332	0.564145	0.646547	0.551335	0.334967	0.489012	0.706856	0.274377	0.429036	0.457913	0.629732	0.574763	0.601803	0.810549	0.507854	0.57078	0.662242	0.649325	0.457232	0.336746	0.550553	0.640068	0.297073	0.829926	0.935891	0.708924	0.977798	0.902292
TCGA-CR-7397-01A-11R-2016-07	3.60044	low-FANCE	0.515143	0.669935	0.521246	0.493466	0.791726	0.478003	0.491635	0.582112	0.464672	0.313316	0.444917	0.521146	0.167497	0.260475	0.437138	0.572434	0.577505	0.597802	0.644958	0.437126	0.53272	0.651676	0.632538	0.362576	0.198628	0.396929	0.602821	0.293972	0.591706	0.735645	0.494446	0.854961	0.760564
TCGA-CV-5973-01A-11R-1686-07	3.60048	low-FANCE	0.439963	0.578901	0.418656	0.407733	0.73635	0.395727	0.418905	0.591395	0.36065	0.324717	0.379787	0.433244	0.0526915	0.179122	0.296658	0.502741	0.605627	0.596338	0.539292	0.406351	0.492071	0.627377	0.587093	0.318936	0.221561	0.353646	0.622073	0.393023	0.476199	0.489597	0.309774	0.684311	0.80685
TCGA-H7-A6C5-11A-11R-A30B-07	3.62514	low-FANCE	0.506945	0.552079	0.482075	0.35189	0.714719	0.405372	0.331325	0.520029	0.369233	0.33081	0.370307	0.343321	0.15645	0.17755	0.318322	0.492631	0.586077	0.565076	0.517143	0.30421	0.509173	0.621628	0.666485	0.316288	0.275354	0.279982	0.632709	0.205792	0.440864	0.645338	0.329054	0.519055	0.449768
TCGA-CR-7367-01A-11R-2016-07	3.64676	low-FANCE	0.522653	0.64534	0.515893	0.520638	0.792481	0.463514	0.496211	0.602762	0.454708	0.291767	0.430814	0.537655	0.242015	0.309502	0.393094	0.553941	0.579605	0.601562	0.641926	0.415956	0.529779	0.644944	0.61311	0.340557	0.188908	0.34086	0.618095	0.359916	0.596857	0.769328	0.475597	0.734904	0.642669
TCGA-IQ-7631-01A-11R-2081-07	3.75521	low-FANCE	0.41062	0.596794	0.391686	0.305435	0.799213	0.434404	0.372565	0.537821	0.38166	0.317659	0.350337	0.307768	0.0239833	0.120677	0.309259	0.559382	0.577089	0.612005	0.488663	0.347163	0.443892	0.659742	0.605914	0.282257	0.156093	0.256046	0.615683	0.160458	0.324906	0.475486	0.247535	0.400061	0.452532
TCGA-CR-7393-01A-11R-2016-07	3.79861	low-FANCE	0.6747	0.677357	0.583593	0.564541	0.80762	0.522318	0.539205	0.598113	0.514099	0.315806	0.468849	0.614798	0.343973	0.419274	0.447814	0.620721	0.583939	0.5875	0.731644	0.447404	0.56473	0.664259	0.662333	0.405936	0.357456	0.517719	0.645151	0.329617	0.706047	0.881147	0.728306	0.775114	0.799276
TCGA-MT-A67A-01A-11R-A30B-07	3.86988	low-FANCE	0.626821	0.58891	0.467556	0.465274	0.756112	0.458111	0.423101	0.56901	0.388486	0.287814	0.442084	0.330295	0.123684	0.204468	0.325272	0.473517	0.557407	0.588857	0.538184	0.377879	0.472346	0.602704	0.596294	0.295534	0.191535	0.329347	0.592422	0.356397	0.458243	0.577354	0.375972	0.866675	0.798635
TCGA-CV-A6JT-01A-11R-A31N-07	3.87499	low-FANCE	0.59987	0.61448	0.524678	0.370339	0.770412	0.457048	0.480376	0.618606	0.43936	0.330157	0.379669	0.505847	0.130072	0.27032	0.399102	0.575503	0.610803	0.645727	0.615179	0.423938	0.512519	0.623604	0.556211	0.32398	0.219862	0.330089	0.61999	0.343244	0.608824	0.566138	0.449023	0.863504	0.943883
TCGA-CR-6488-01A-12R-2081-07	3.87791	low-FANCE	0.538774	0.675663	0.513679	0.46592	0.79339	0.469533	0.510203	0.598701	0.452795	0.305956	0.421981	0.586017	0.14223	0.303608	0.412297	0.587946	0.600678	0.636099	0.674887	0.438894	0.541754	0.64906	0.633832	0.413708	0.257054	0.416748	0.627602	0.33433	0.698895	0.793124	0.498529	0.658414	0.719926
TCGA-CN-A63V-01A-11R-A466-07	3.95313	low-FANCE	0.472918	0.628446	0.453663	0.422042	0.76988	0.483401	0.428166	0.563767	0.424025	0.314141	0.417881	0.471027	0.111555	0.188696	0.384135	0.547186	0.572531	0.599105	0.575094	0.406562	0.525388	0.611399	0.625223	0.333226	0.164301	0.304329	0.636492	0.301606	0.52997	0.579978	0.35397	0.501129	0.423124
TCGA-CV-A468-01A-11R-A266-07	3.9556	low-FANCE	0.73537	0.6297	0.579531	0.564674	0.805133	0.486357	0.543289	0.58932	0.500575	0.312059	0.43918	0.528666	0.275474	0.340623	0.395188	0.580967	0.612429	0.604512	0.699356	0.453057	0.535115	0.642067	0.628642	0.377603	0.284968	0.388024	0.605415	0.310612	0.647803	0.795108	0.636609	0.967359	0.962878
TCGA-CV-6961-11A-01R-1915-07	4.01374	low-FANCE	0.461131	0.578463	0.467956	0.376855	0.737115	0.512478	0.443924	0.55062	0.407364	0.285677	0.413934	0.332536	0.0590129	0.154935	0.346255	0.469292	0.571588	0.605252	0.490933	0.33641	0.463841	0.61114	0.622363	0.279048	0.287652	0.363575	0.602613	0.363217	0.427523	0.52652	0.261623	0.558486	0.488606
TCGA-CV-7103-01A-21R-2016-07	4.07314	low-FANCE	0.429448	0.647916	0.42573	0.397306	0.786392	0.463702	0.46188	0.556948	0.418105	0.295423	0.394158	0.444577	0.1066	0.193775	0.405741	0.548491	0.584011	0.586452	0.527837	0.425229	0.471379	0.612216	0.583196	0.318934	0.167092	0.325693	0.619455	0.0328802	0.457076	0.570039	0.308158	0.513808	0.452024
TCGA-CR-7377-01A-11R-2016-07	4.07949	low-FANCE	0.65212	0.637963	0.581167	0.562794	0.81453	0.520879	0.524661	0.612043	0.508952	0.293388	0.440231	0.554011	0.311577	0.386847	0.457848	0.599051	0.602904	0.582424	0.717268	0.441035	0.546996	0.648269	0.627306	0.379497	0.219946	0.410865	0.624485	0.249344	0.692029	0.846113	0.656629	0.925364	0.878339
TCGA-UF-A7JV-01A-11R-A34R-07	4.12396	low-FANCE	0.557125	0.627153	0.530891	0.587564	0.801144	0.473094	0.498248	0.614619	0.475747	0.330902	0.449502	0.621451	0.126115	0.323828	0.390332	0.591277	0.613598	0.605929	0.701102	0.481169	0.577448	0.654998	0.624571	0.418264	0.229054	0.358752	0.630143	0.255828	0.706295	0.78707	0.512417	0.877678	0.871868
TCGA-D6-6824-01A-11R-1915-07	4.23742	low-FANCE	0.611558	0.669207	0.56672	0.496099	0.796553	0.499138	0.462363	0.613496	0.482651	0.319616	0.465736	0.602563	0.258884	0.342262	0.399271	0.608902	0.600717	0.594554	0.706332	0.429182	0.553247	0.680182	0.684711	0.415946	0.220967	0.423962	0.649727	0.308698	0.72382	0.842372	0.602719	0.876037	0.835958
TCGA-CV-A6JO-01B-11R-A34R-07	4.24012	low-FANCE	0.654158	0.607849	0.542931	0.540211	0.78577	0.45812	0.474904	0.5828	0.460776	0.325812	0.442347	0.471795	0.201836	0.336564	0.363627	0.521184	0.614772	0.578002	0.654044	0.436319	0.513044	0.591303	0.623545	0.335226	0.265047	0.258776	0.602155	0.317233	0.602329	0.713053	0.503124	0.971568	0.960081
TCGA-BA-A6D8-01A-31R-A31N-07	4.27102	low-FANCE	0.508396	0.560619	0.435713	0.400218	0.722188	0.433292	0.442991	0.561349	0.391167	0.283622	0.346122	0.417866	0.145778	0.15839	0.385666	0.515256	0.60413	0.615854	0.549913	0.386831	0.465003	0.6104	0.589292	0.408488	0.218622	0.361946	0.628864	0.147767	0.529116	0.484356	0.374896	0.426298	0.347187
TCGA-CR-7391-01A-11R-2016-07	4.27968	low-FANCE	0.657228	0.660243	0.568424	0.498173	0.80647	0.518444	0.533339	0.610713	0.496251	0.317606	0.446245	0.565117	0.25891	0.359572	0.412693	0.589434	0.597664	0.623321	0.697033	0.441089	0.551286	0.661048	0.658987	0.383905	0.187392	0.455682	0.637593	0.365247	0.676149	0.843922	0.642884	0.890657	0.847455
TCGA-CV-6943-11A-01R-1915-07	4.33854	low-FANCE	0.5468	0.584201	0.501229	0.445541	0.724714	0.508887	0.450198	0.54655	0.40102	0.273359	0.406728	0.352722	0.122702	0.207332	0.371096	0.493925	0.563897	0.599204	0.542439	0.340512	0.508475	0.627986	0.636783	0.278547	0.245755	0.355942	0.592014	0.359681	0.468557	0.649403	0.392099	0.816823	0.655194
TCGA-P3-A6T4-01A-11R-A34R-07	4.34287	low-FANCE	0.461557	0.589846	0.433205	0.469736	0.759417	0.434382	0.42247	0.58629	0.375352	0.320124	0.391193	0.36828	0.0923988	0.177296	0.33703	0.489529	0.586429	0.569611	0.487321	0.369208	0.524972	0.619523	0.619915	0.286358	0.230639	0.298605	0.56675	0.431149	0.377377	0.528732	0.278709	0.733179	0.81554
TCGA-CR-7382-01A-11R-2132-07	4.34751	low-FANCE	0.606468	0.689675	0.608755	0.605891	0.813096	0.539559	0.51958	0.626033	0.529428	0.325445	0.479067	0.645547	0.284627	0.421591	0.428431	0.648247	0.603768	0.590113	0.743687	0.465059	0.537304	0.655279	0.643959	0.434764	0.340044	0.483001	0.64792	0.321131	0.795909	0.90287	0.66881	0.985612	0.979637
TCGA-CV-7440-01A-11R-2132-07	4.3591	low-FANCE	0.448039	0.618368	0.43882	0.573046	0.743591	0.46986	0.385186	0.571248	0.427864	0.307142	0.421288	0.449019	0.0930536	0.249181	0.394502	0.545101	0.597252	0.572479	0.559023	0.443757	0.533856	0.612034	0.627647	0.306578	0.237736	0.322896	0.589607	0.245753	0.476784	0.612376	0.35074	0.81294	0.766444
TCGA-CV-7242-11A-01R-2016-07	4.35928	low-FANCE	0.55443	0.601164	0.519006	0.486137	0.739862	0.470313	0.477803	0.56324	0.414649	0.304798	0.429417	0.399188	0.1819	0.249509	0.409007	0.537524	0.573986	0.585639	0.580017	0.36765	0.529224	0.632217	0.634176	0.331165	0.277067	0.416662	0.617804	0.327677	0.550294	0.678772	0.443039	0.720612	0.558779
TCGA-CV-7238-01A-11R-2016-07	4.38997	low-FANCE	0.611316	0.610713	0.526382	0.506223	0.794715	0.492037	0.457827	0.59255	0.461461	0.299273	0.406465	0.509149	0.237361	0.2977	0.393992	0.565876	0.614828	0.641192	0.640144	0.43321	0.553042	0.637637	0.594236	0.32618	0.197624	0.290746	0.60236	0.330836	0.56302	0.689823	0.523744	0.910176	0.942134
TCGA-CV-7250-11A-01R-2016-07	4.41485	low-FANCE	0.61957	0.5912	0.553926	0.508153	0.738871	0.506544	0.473824	0.555985	0.455674	0.342573	0.434274	0.386309	0.292264	0.349676	0.397175	0.571197	0.574206	0.584592	0.623547	0.372133	0.54329	0.607161	0.63569	0.29826	0.284002	0.340618	0.60829	0.299997	0.552148	0.790538	0.565306	0.873532	0.737927
TCGA-CV-7416-11A-01R-2081-07	4.50456	low-FANCE	0.462725	0.574975	0.493703	0.473128	0.719161	0.459044	0.422288	0.517625	0.384305	0.311527	0.427211	0.329113	0.0705618	0.180915	0.354931	0.470608	0.585509	0.594248	0.511319	0.343017	0.494407	0.616332	0.633471	0.273139	0.289592	0.334453	0.589935	0.350136	0.385044	0.517338	0.295697	0.531746	0.414689
TCGA-CN-6998-01A-23R-2016-07	4.51105	low-FANCE	0.512025	0.592017	0.46238	0.464232	0.74887	0.469197	0.447646	0.577413	0.411645	0.317653	0.459984	0.464784	0.103782	0.234426	0.385142	0.502171	0.590952	0.608286	0.541542	0.440199	0.51045	0.616601	0.618101	0.28027	0.230892	0.311902	0.612745	0.395528	0.474392	0.601102	0.349727	0.922748	0.925313
TCGA-CR-7379-01A-11R-2016-07	4.51143	low-FANCE	0.450021	0.694591	0.472096	0.530582	0.779768	0.448534	0.489517	0.613283	0.442457	0.296985	0.44347	0.545207	0.153398	0.262084	0.381424	0.550945	0.58133	0.628674	0.606051	0.424355	0.507756	0.640681	0.639002	0.364111	0.266571	0.434015	0.611215	0.423214	0.593411	0.733665	0.397657	0.657358	0.56986
TCGA-D6-6515-01A-21R-1873-07	4.52812	low-FANCE	0.691987	0.704356	0.607763	0.5546	0.819453	0.478261	0.551148	0.588491	0.509208	0.326578	0.482234	0.587871	0.280196	0.400867	0.471286	0.631826	0.619067	0.586712	0.735659	0.465327	0.583127	0.624656	0.681842	0.461407	0.18376	0.372362	0.661038	0.309941	0.774107	0.878103	0.664147	0.994534	0.971257
TCGA-WA-A7GZ-11A-11R-A34R-07	4.53192	low-FANCE	0.423956	0.563876	0.427557	0.298176	0.722166	0.522579	0.396399	0.511929	0.353596	0.271986	0.356233	0.302577	0.0605751	0.139674	0.367515	0.50508	0.549115	0.596618	0.424265	0.323678	0.439893	0.628511	0.620067	0.235122	0.222787	0.299689	0.554976	0.189944	0.349149	0.493078	0.197586	0.394604	0.460997
TCGA-KU-A6H8-01A-21R-A34R-07	4.53398	low-FANCE	0.616561	0.612355	0.482998	0.460516	0.762713	0.515575	0.442916	0.586451	0.431897	0.298257	0.420526	0.384322	0.157384	0.229185	0.400699	0.559067	0.565195	0.607412	0.570651	0.367353	0.476293	0.618607	0.642291	0.274967	0.231097	0.363253	0.598557	0.199559	0.466727	0.609431	0.437505	0.749817	0.63837
TCGA-CQ-6218-01A-11R-1915-07	4.54741	low-FANCE	0.539778	0.621902	0.525806	0.539002	0.787793	0.492805	0.471465	0.613093	0.443076	0.32288	0.463732	0.477177	0.159479	0.277613	0.396598	0.536247	0.595069	0.603368	0.604373	0.415481	0.511971	0.625512	0.605704	0.331674	0.254569	0.415672	0.610496	0.428287	0.563185	0.653651	0.442827	0.938211	0.973285
TCGA-CV-7252-11A-01R-2016-07	4.58165	low-FANCE	0.529659	0.56245	0.487501	0.477592	0.736561	0.466621	0.435621	0.51465	0.413062	0.320101	0.432852	0.315789	0.0894249	0.163464	0.405999	0.507512	0.564721	0.602922	0.523814	0.356514	0.48253	0.631278	0.624454	0.257314	0.293841	0.342425	0.575645	0.357524	0.345496	0.606259	0.377903	0.482729	0.446298
TCGA-CR-7371-01A-11R-2016-07	4.59178	low-FANCE	0.575861	0.688374	0.501403	0.574731	0.787878	0.458353	0.464673	0.602733	0.467399	0.333771	0.449663	0.514734	0.206193	0.308309	0.404108	0.569615	0.599135	0.608798	0.650365	0.395135	0.566624	0.658477	0.617734	0.364958	0.223176	0.41237	0.626743	0.378684	0.596599	0.800176	0.561267	0.781681	0.733775
TCGA-CV-5970-01A-11R-1686-07	4.61162	low-FANCE	0.491273	0.640483	0.501137	0.470106	0.763844	0.473331	0.484506	0.596164	0.424572	0.36023	0.431985	0.4892	0.157127	0.273494	0.394308	0.56191	0.59475	0.576499	0.587226	0.415116	0.543149	0.618993	0.614457	0.321773	0.23527	0.334877	0.59948	0.440563	0.542547	0.654039	0.389704	0.835695	0.794128
TCGA-CV-7236-01A-11R-2016-07	4.61847	low-FANCE	0.472319	0.618978	0.489255	0.498769	0.762092	0.473159	0.430739	0.56839	0.445307	0.29594	0.454338	0.478104	0.14073	0.260654	0.437466	0.572274	0.574111	0.620208	0.565834	0.433532	0.521371	0.628408	0.622285	0.31076	0.252608	0.30655	0.603797	0.251706	0.507752	0.633163	0.366815	0.852869	0.793203
TCGA-KU-A66S-01A-21R-A30B-07	4.67488	low-FANCE	0.493066	0.49902	0.421247	0.453871	0.720147	0.466107	0.352132	0.551996	0.366276	0.272496	0.399625	0.369868	0.0282568	0.154479	0.305704	0.527081	0.588392	0.56828	0.531731	0.365388	0.533659	0.579732	0.590915	0.241874	0.208478	0.328764	0.573774	0.124875	0.440196	0.515151	0.28336	0.725548	0.700995
TCGA-CN-6997-01A-11R-2016-07	4.72165	low-FANCE	0.451893	0.619433	0.443062	0.494786	0.770013	0.420654	0.377701	0.539554	0.380474	0.19807	0.430759	0.371234	0.122227	0.230325	0.3947	0.514752	0.605754	0.604111	0.496109	0.401941	0.50301	0.596307	0.644539	0.327585	0.201587	0.290575	0.599687	0.0986907	0.429057	0.592128	0.265677	0.551118	0.507833
TCGA-CV-A45O-01A-21R-A24H-07	4.78369	low-FANCE	0.542402	0.609258	0.554323	0.43664	0.772799	0.465389	0.493046	0.583169	0.425038	0.327097	0.442639	0.447719	0.0798188	0.276519	0.330312	0.515567	0.579736	0.606713	0.606999	0.390716	0.533045	0.639341	0.623593	0.332837	0.295793	0.359207	0.614982	0.539161	0.56446	0.65549	0.409949	0.851791	0.936876
TCGA-CR-7394-01A-11R-2016-07	4.78853	low-FANCE	0.723479	0.66258	0.610582	0.59196	0.813459	0.491155	0.536335	0.636627	0.499427	0.338094	0.476959	0.607638	0.351198	0.428092	0.409089	0.602976	0.573456	0.593287	0.736581	0.443243	0.557202	0.673046	0.626092	0.375631	0.28952	0.418928	0.632513	0.434411	0.710394	0.900683	0.699505	0.966644	0.92639
TCGA-CV-6936-11A-01R-1915-07	4.78917	low-FANCE	0.55309	0.642913	0.561265	0.474204	0.777961	0.52101	0.523185	0.605819	0.45686	0.317082	0.431481	0.532171	0.141902	0.27335	0.394876	0.585502	0.582833	0.593301	0.660494	0.417496	0.512616	0.64485	0.645295	0.373462	0.336809	0.590037	0.62014	0.345172	0.651104	0.713184	0.470921	0.712636	0.653887
TCGA-CV-A6JM-01A-11R-A31N-07	4.81402	low-FANCE	0.52351	0.595695	0.438346	0.427455	0.707901	0.422886	0.40454	0.582152	0.4035	0.348594	0.382807	0.467319	0.127533	0.205848	0.37142	0.45768	0.573415	0.596149	0.605626	0.402895	0.482247	0.601182	0.579192	0.342089	0.207604	0.327192	0.601116	0.290646	0.565354	0.46714	0.335519	0.602943	0.622841
TCGA-QK-A6IG-01A-11R-A31N-07	4.8739	low-FANCE	0.61716	0.578129	0.479105	0.579525	0.766565	0.436578	0.444024	0.601172	0.429022	0.249463	0.431808	0.479554	0.155907	0.231751	0.387701	0.573042	0.599777	0.577875	0.632242	0.447872	0.524104	0.600653	0.603473	0.369328	0.243802	0.314495	0.619297	0.266608	0.56558	0.632984	0.448001	0.927725	0.912089
TCGA-HD-8635-11A-01R-2403-07	4.88536	low-FANCE	0.643312	0.580024	0.566337	0.501961	0.739203	0.481327	0.482694	0.548305	0.44091	0.333709	0.42792	0.371556	0.145023	0.244603	0.379926	0.540273	0.569668	0.584175	0.610376	0.353124	0.554595	0.620092	0.64121	0.307785	0.237559	0.320249	0.603446	0.430258	0.489632	0.772267	0.544925	0.861388	0.710265
TCGA-CV-7423-11A-01R-2081-07	4.8867	low-FANCE	0.611813	0.572963	0.49909	0.485943	0.736754	0.482912	0.443909	0.561833	0.421606	0.292499	0.439772	0.357591	0.176853	0.224175	0.364764	0.501078	0.579393	0.6167	0.559241	0.369563	0.513004	0.587298	0.63567	0.31567	0.247073	0.308275	0.602547	0.277889	0.495983	0.630884	0.442083	0.882276	0.67378
TCGA-BA-4074-01A-01R-1436-07	4.8914	low-FANCE	0.513155	0.588211	0.459551	0.583412	0.731478	0.483281	0.439492	0.613283	0.453302	0.286432	0.50472	0.49207	0.146376	0.216893	0.40759	0.522262	0.605534	0.576152	0.556865	0.442472	0.526061	0.573228	0.641326	0.366119	0.155522	0.318996	0.581988	0.239676	0.539993	0.661297	0.410974	0.774098	0.771894
TCGA-CR-6474-01A-11R-1873-07	4.92208	low-FANCE	0.531357	0.670389	0.521441	0.536756	0.802263	0.481496	0.493364	0.612854	0.480109	0.326168	0.455464	0.580052	0.174026	0.285197	0.428887	0.581488	0.594512	0.629601	0.644336	0.452583	0.570434	0.664571	0.637694	0.404722	0.291225	0.492583	0.625035	0.35797	0.603591	0.785395	0.506365	0.8293	0.698212
TCGA-D6-A6ES-01A-12R-A31N-07	4.93812	low-FANCE	0.491487	0.584566	0.454271	0.44583	0.71182	0.453855	0.432401	0.611115	0.417976	0.324542	0.399592	0.516282	0.127635	0.190921	0.386219	0.472551	0.565932	0.624262	0.625733	0.414555	0.5323	0.609071	0.589599	0.353525	0.250148	0.406305	0.631991	0.444079	0.583699	0.484379	0.378861	0.541947	0.52198
TCGA-BA-5151-01A-01R-1436-07	4.96218	low-FANCE	0.519609	0.648018	0.513882	0.564749	0.785472	0.48527	0.473475	0.614931	0.441406	0.336538	0.474065	0.556796	0.169175	0.328481	0.398319	0.544498	0.595169	0.559766	0.621666	0.420203	0.537839	0.64835	0.651715	0.367857	0.278047	0.432851	0.619771	0.529279	0.603281	0.782074	0.476608	0.816306	0.938508
TCGA-CV-A6K0-01B-21R-A31N-07	4.98321	low-FANCE	0.643837	0.643734	0.560942	0.528317	0.805715	0.485521	0.522256	0.588028	0.485067	0.286888	0.460699	0.511784	0.227268	0.325293	0.455014	0.616766	0.600994	0.633497	0.675674	0.423941	0.533748	0.63673	0.651642	0.384479	0.262654	0.340736	0.610352	0.184955	0.671752	0.818962	0.620171	0.936039	0.884274
TCGA-CV-A465-01A-11R-A266-07	4.99047	low-FANCE	0.447295	0.552859	0.381448	0.45155	0.727418	0.474913	0.425595	0.53574	0.356046	0.294438	0.418559	0.364555	0.092329	0.157379	0.356844	0.458092	0.591443	0.600816	0.447544	0.367193	0.478749	0.613811	0.593899	0.229866	0.170911	0.322031	0.584024	0.370611	0.31714	0.457493	0.226885	0.711994	0.800183
TCGA-CR-7386-01A-11R-2016-07	5.01608	low-FANCE	0.62828	0.674071	0.570984	0.53321	0.817158	0.514314	0.542171	0.642098	0.510829	0.310448	0.446258	0.59851	0.194075	0.358668	0.451433	0.587129	0.609263	0.611749	0.72015	0.47535	0.540492	0.638187	0.643468	0.419187	0.22319	0.447673	0.611393	0.315738	0.742573	0.839069	0.598894	0.949757	0.968524
TCGA-CV-6943-01A-11R-1915-07	5.03629	low-FANCE	0.741586	0.665932	0.628708	0.571478	0.824989	0.484931	0.551517	0.628215	0.53923	0.346191	0.454549	0.589623	0.327609	0.405577	0.416535	0.638828	0.586734	0.609756	0.747738	0.458224	0.554484	0.64491	0.613114	0.413555	0.241999	0.418019	0.639727	0.354382	0.748998	0.887455	0.70672	0.988203	0.966313
TCGA-CQ-5325-01A-01R-1686-07	5.05598	low-FANCE	0.719931	0.655611	0.62576	0.604831	0.827753	0.512612	0.556125	0.647379	0.522964	0.311742	0.449305	0.608678	0.398842	0.455936	0.415117	0.611196	0.596952	0.58334	0.771577	0.488779	0.549427	0.644536	0.641857	0.396919	0.248833	0.412542	0.63072	0.361422	0.755658	0.855992	0.700872	0.983523	0.962584
TCGA-CQ-6222-01A-11R-1915-07	5.1163	low-FANCE	0.655068	0.623471	0.559773	0.483582	0.790126	0.49661	0.542509	0.633201	0.4998	0.337749	0.438638	0.588514	0.186065	0.339925	0.348902	0.602796	0.607865	0.648784	0.737075	0.439151	0.56574	0.627441	0.663904	0.420841	0.243367	0.366547	0.637396	0.357804	0.751848	0.8003	0.583276	0.890043	0.807947
TCGA-CR-7392-01A-11R-2016-07	5.14535	low-FANCE	0.624484	0.685893	0.566498	0.540323	0.81649	0.462337	0.515535	0.638328	0.495076	0.304116	0.460642	0.580974	0.34757	0.43779	0.397882	0.612003	0.602365	0.594757	0.70936	0.45762	0.537386	0.665342	0.622901	0.36995	0.233863	0.431308	0.649431	0.388149	0.670905	0.848904	0.638346	0.958032	0.964947
TCGA-CQ-5333-01A-01R-2403-07	5.1571	low-FANCE	0.700981	0.604162	0.590516	0.544338	0.8014	0.485056	0.521946	0.620225	0.488971	0.300835	0.446621	0.657052	0.254896	0.360064	0.403441	0.605503	0.615699	0.574546	0.769757	0.465003	0.555863	0.617997	0.646951	0.433393	0.185123	0.358661	0.647098	0.271657	0.827089	0.85318	0.641686	0.981823	0.842497
TCGA-F7-A624-01A-22R-A30B-07	5.1575	low-FANCE	0.771041	0.57395	0.600864	0.639366	0.809137	0.487335	0.502413	0.633006	0.497133	0.247231	0.468161	0.592755	0.327902	0.401299	0.366305	0.569369	0.546519	0.54466	0.759421	0.463301	0.527266	0.600921	0.586734	0.45066	0.218791	0.333004	0.632879	0.176324	0.792698	0.834502	0.667261	0.952779	0.765124
TCGA-CV-5436-01A-01R-1514-07	5.20087	low-FANCE	0.526592	0.573603	0.453105	0.527954	0.752083	0.475914	0.401559	0.565157	0.408383	0.260818	0.479976	0.456048	0.143122	0.183331	0.421901	0.481561	0.598296	0.578432	0.523631	0.404979	0.517026	0.600681	0.567379	0.264144	0.242456	0.344282	0.606012	0.266288	0.440467	0.546845	0.348873	0.835581	0.869735
TCGA-CV-A6JN-01A-11R-A31N-07	5.2273	low-FANCE	0.611024	0.587326	0.526076	0.475306	0.739158	0.454802	0.448618	0.580194	0.423127	0.315855	0.428837	0.440983	0.177034	0.260324	0.363993	0.475703	0.604613	0.602678	0.607551	0.404313	0.52355	0.601866	0.583383	0.323457	0.26666	0.325678	0.626908	0.376996	0.548631	0.568289	0.46285	0.895768	0.911585
TCGA-DQ-5631-01A-01R-1873-07	5.23846	low-FANCE	0.419508	0.606039	0.405597	0.458954	0.759241	0.429451	0.3939	0.542569	0.383271	0.281869	0.375155	0.469264	0.130594	0.22588	0.446996	0.550569	0.595964	0.555271	0.488009	0.434933	0.488052	0.610515	0.617148	0.266646	0.122649	0.235611	0.622536	0.141027	0.399093	0.577272	0.277194	0.574936	0.553845
TCGA-CV-7437-01A-21R-2132-07	5.29233	low-FANCE	0.46183	0.641512	0.415626	0.441635	0.734584	0.41264	0.385374	0.576172	0.375831	0.271265	0.406063	0.408891	0.0903077	0.223559	0.439273	0.496045	0.616169	0.591268	0.501598	0.383267	0.543616	0.569048	0.63357	0.300635	0.158499	0.281106	0.590751	0.125248	0.484685	0.557586	0.277886	0.625394	0.512769
TCGA-CN-4728-01A-01R-1436-07	5.30108	low-FANCE	0.585549	0.686331	0.559195	0.562343	0.817783	0.506159	0.568513	0.655071	0.512291	0.336705	0.41729	0.661011	0.170479	0.38594	0.459802	0.625708	0.594191	0.641381	0.766918	0.50296	0.581743	0.661093	0.625341	0.45126	0.256591	0.467818	0.611991	0.195925	0.788713	0.857696	0.595729	0.83867	0.799507
TCGA-CV-7248-01A-11R-2016-07	5.30998	low-FANCE	0.578642	0.598155	0.485996	0.506629	0.777474	0.470289	0.449877	0.580671	0.435321	0.269458	0.431297	0.45227	0.310246	0.368236	0.409203	0.530189	0.57991	0.586608	0.631365	0.420988	0.526952	0.642134	0.625223	0.339032	0.193993	0.298404	0.598239	0.162534	0.552369	0.690462	0.514843	0.703311	0.705581
TCGA-CV-6934-01A-11R-1915-07	5.34545	low-FANCE	0.639469	0.706851	0.558182	0.507573	0.804976	0.528836	0.523346	0.605702	0.517614	0.290001	0.432843	0.610555	0.170339	0.321688	0.431609	0.617358	0.607226	0.635093	0.722863	0.478476	0.552486	0.634581	0.619296	0.423788	0.245134	0.435098	0.615181	0.216797	0.696662	0.817011	0.58831	0.872324	0.856225
TCGA-CV-7089-01A-11R-2016-07	5.36337	low-FANCE	0.532652	0.578893	0.492372	0.507095	0.746409	0.48033	0.463262	0.581204	0.41766	0.326219	0.448947	0.457145	0.165987	0.247899	0.396148	0.519358	0.601981	0.580274	0.571207	0.390726	0.530305	0.622718	0.621059	0.310083	0.197644	0.372965	0.587462	0.356729	0.497029	0.634805	0.423622	0.911628	0.902437
TCGA-CV-7178-11A-01R-2016-07	5.38016	low-FANCE	0.510635	0.577134	0.437565	0.333237	0.736301	0.405995	0.430475	0.536179	0.416549	0.299434	0.415646	0.323788	0.160069	0.188544	0.389386	0.507289	0.591575	0.586939	0.53613	0.359146	0.481949	0.618433	0.611365	0.294013	0.238671	0.341129	0.624834	0.145022	0.450335	0.591164	0.292235	0.51563	0.390196
TCGA-CV-6955-11A-01R-2016-07	5.38642	low-FANCE	0.629215	0.596357	0.538264	0.500129	0.775575	0.414697	0.467409	0.54008	0.456645	0.334878	0.452809	0.457536	0.201817	0.299351	0.399209	0.573409	0.578418	0.590005	0.605348	0.369427	0.545111	0.641933	0.667582	0.306634	0.248947	0.391539	0.610978	0.425328	0.521305	0.775082	0.533428	0.909348	0.885826
TCGA-BA-5558-01A-01R-1514-07	5.40798	low-FANCE	0.584935	0.63421	0.521446	0.536477	0.782503	0.503773	0.491957	0.617096	0.433478	0.292016	0.445323	0.565718	0.17174	0.318304	0.371457	0.563923	0.615236	0.577488	0.676549	0.433411	0.527572	0.650603	0.634892	0.380385	0.291862	0.534117	0.625629	0.435281	0.643855	0.763379	0.508509	0.913371	0.895298
TCGA-CV-7433-01A-11R-2132-07	5.42401	low-FANCE	0.691483	0.669096	0.583854	0.585222	0.824213	0.49388	0.529176	0.643949	0.523346	0.335252	0.465553	0.644009	0.218789	0.347262	0.404873	0.605927	0.581612	0.624384	0.754986	0.482383	0.576828	0.630007	0.622741	0.437459	0.22138	0.328731	0.631761	0.342679	0.770064	0.824054	0.624129	0.966817	0.938934
TCGA-CX-7085-01A-21R-2016-07	5.43052	low-FANCE	0.641915	0.697431	0.600871	0.588733	0.815414	0.54254	0.56953	0.625025	0.537009	0.351054	0.471672	0.661123	0.364913	0.431424	0.406078	0.637156	0.58592	0.602634	0.76628	0.475052	0.562444	0.710157	0.665044	0.437832	0.344558	0.54846	0.659761	0.539545	0.756662	0.90139	0.702482	0.937553	0.849097
TCGA-CV-A45T-01A-11R-A24H-07	5.46912	low-FANCE	0.741911	0.604532	0.590651	0.608065	0.805967	0.493845	0.524627	0.610297	0.497909	0.294925	0.460088	0.519361	0.445718	0.45562	0.405088	0.602878	0.60761	0.595546	0.720092	0.449512	0.540313	0.640957	0.623323	0.381687	0.268857	0.391954	0.635965	0.363745	0.657898	0.812192	0.699901	0.977267	0.964524
TCGA-CV-7090-01A-11R-2016-07	5.47997	low-FANCE	0.569589	0.668783	0.557251	0.529438	0.803866	0.510687	0.49741	0.621939	0.449527	0.311608	0.446955	0.599261	0.159658	0.366179	0.4402	0.557908	0.607761	0.621873	0.70338	0.455682	0.527063	0.635487	0.612334	0.399125	0.233462	0.412441	0.615422	0.289175	0.718226	0.789239	0.532522	0.950527	0.975895
TCGA-CQ-A4CE-01A-11R-A266-07	5.49284	low-FANCE	0.581052	0.579875	0.506421	0.491348	0.743541	0.458344	0.44206	0.568961	0.422372	0.316196	0.446294	0.380847	0.16273	0.253295	0.352606	0.488296	0.558668	0.591202	0.55092	0.356836	0.513819	0.645382	0.610513	0.286003	0.215131	0.322823	0.60378	0.453074	0.429053	0.629106	0.408219	0.886259	0.819262
TCGA-CV-7423-01A-11R-2081-07	5.58256	low-FANCE	0.406247	0.597959	0.413382	0.453958	0.745783	0.443264	0.420791	0.57581	0.3802	0.304666	0.436247	0.409777	0.0854245	0.175429	0.39745	0.522577	0.608349	0.580926	0.47006	0.433053	0.495592	0.598784	0.599475	0.230209	0.179452	0.324721	0.580763	0.353176	0.353049	0.475705	0.257201	0.696134	0.790612
TCGA-CV-7435-01A-11R-2132-07	5.58264	low-FANCE	0.486421	0.686845	0.512651	0.515333	0.787126	0.469191	0.49392	0.590732	0.473656	0.302888	0.430676	0.534848	0.193777	0.315846	0.405436	0.571021	0.595388	0.570745	0.65806	0.451457	0.513888	0.618817	0.617768	0.372078	0.219574	0.360887	0.613588	0.223062	0.635149	0.749386	0.482114	0.870428	0.93888
TCGA-CR-7401-01A-11R-2016-07	5.60323	low-FANCE	0.497223	0.643025	0.494061	0.454791	0.791597	0.498437	0.460857	0.581164	0.4443	0.322213	0.451119	0.453635	0.145418	0.234911	0.419986	0.546964	0.596233	0.596708	0.560348	0.423175	0.509762	0.633462	0.619008	0.330515	0.185488	0.425437	0.602154	0.32666	0.52106	0.64094	0.429778	0.808998	0.882299
TCGA-CV-7430-01A-11R-2132-07	5.61328	low-FANCE	0.412055	0.60446	0.415703	0.505123	0.726698	0.427656	0.387394	0.520798	0.392042	0.375178	0.445654	0.333094	0.0379683	0.13208	0.379043	0.506997	0.584937	0.6081	0.454554	0.361003	0.499723	0.606827	0.606828	0.261421	0.196648	0.303738	0.565808	0.358575	0.356537	0.486917	0.225119	0.553235	0.584918
TCGA-CV-7427-01A-11R-2081-07	5.63611	low-FANCE	0.660958	0.609267	0.595198	0.602684	0.780958	0.461777	0.507853	0.601268	0.464861	0.366925	0.464498	0.543241	0.197758	0.369809	0.384815	0.588893	0.577946	0.556482	0.691186	0.435945	0.57142	0.618329	0.622786	0.37357	0.278633	0.364366	0.622785	0.459586	0.673841	0.817811	0.569771	0.99356	0.933186
TCGA-CV-7440-11A-01R-2187-07	5.64118	low-FANCE	0.482227	0.557162	0.465601	0.421473	0.722209	0.464276	0.376605	0.508121	0.39507	0.347514	0.438583	0.340215	0.0712422	0.220634	0.366782	0.520101	0.588147	0.59203	0.469825	0.360319	0.481877	0.614484	0.663628	0.250797	0.285965	0.366178	0.604908	0.303604	0.389494	0.654561	0.297784	0.555804	0.591805
TCGA-CV-6938-11A-01R-1915-07	5.64136	low-FANCE	0.45138	0.660494	0.473827	0.377479	0.759615	0.489293	0.498527	0.630802	0.440495	0.310782	0.430498	0.464737	0.123648	0.217525	0.383987	0.555762	0.618212	0.547947	0.557473	0.379774	0.486213	0.642441	0.650386	0.377631	0.332814	0.556565	0.613045	0.30984	0.594918	0.642312	0.349449	0.513691	0.49156
TCGA-BA-5557-01A-01R-1514-07	5.64832	low-FANCE	0.577021	0.680288	0.561847	0.623105	0.815284	0.503263	0.574252	0.629993	0.499795	0.38829	0.440702	0.698527	0.161261	0.366911	0.441407	0.595454	0.583993	0.637203	0.746505	0.470143	0.615076	0.7209	0.660582	0.484273	0.332607	0.502716	0.629992	0.550063	0.761684	0.92039	0.620419	0.714864	0.773739
TCGA-CV-6935-11A-01R-1915-07	5.65206	low-FANCE	0.514416	0.617035	0.482076	0.414666	0.725046	0.466881	0.47308	0.581479	0.40976	0.335361	0.403803	0.409149	0.116391	0.223293	0.410274	0.524957	0.57729	0.617031	0.560558	0.350241	0.493115	0.635957	0.637959	0.316531	0.265043	0.391612	0.614282	0.364487	0.513353	0.651409	0.380604	0.556833	0.544638
TCGA-QK-A6IH-01A-11R-A31N-07	5.66198	low-FANCE	0.502777	0.579072	0.445101	0.400323	0.750933	0.454477	0.407554	0.597573	0.388225	0.288392	0.398536	0.430728	0.0803016	0.186829	0.372732	0.487001	0.569106	0.625262	0.547843	0.413524	0.494603	0.581701	0.583059	0.331206	0.199201	0.293749	0.615085	0.274303	0.504707	0.504293	0.304784	0.64827	0.691125
TCGA-CN-6013-01A-11R-1686-07	5.66919	low-FANCE	0.69274	0.621396	0.631792	0.582277	0.803915	0.433286	0.525558	0.638915	0.497655	0.353009	0.438512	0.616505	0.230433	0.401254	0.360378	0.58174	0.595056	0.616836	0.775671	0.477553	0.578707	0.630645	0.635731	0.418194	0.314767	0.371662	0.638162	0.242977	0.754757	0.857952	0.626042	0.950946	0.892744
TCGA-CV-6959-11A-01R-1915-07	5.67095	low-FANCE	0.594983	0.594862	0.523229	0.464126	0.749237	0.507932	0.486117	0.558043	0.436884	0.298033	0.43458	0.381607	0.158631	0.263305	0.427432	0.515177	0.584672	0.610439	0.581042	0.345215	0.526532	0.639407	0.635002	0.287036	0.218894	0.342837	0.591271	0.262053	0.541702	0.684239	0.50823	0.850016	0.716701
TCGA-F7-A50J-01A-21R-A28V-07	5.68085	low-FANCE	0.590699	0.595369	0.483589	0.5284	0.785285	0.460431	0.437007	0.587819	0.429754	0.310639	0.440659	0.433448	0.157038	0.255312	0.379201	0.526724	0.589024	0.605526	0.563716	0.421029	0.549813	0.640379	0.583128	0.295861	0.282328	0.347897	0.593479	0.362129	0.464832	0.591325	0.43629	0.882077	0.85433
TCGA-DQ-5624-01A-01R-1873-07	5.68383	low-FANCE	0.471543	0.635329	0.483548	0.498038	0.77959	0.435477	0.474496	0.569728	0.431679	0.37524	0.442871	0.51934	0.159208	0.252311	0.420126	0.587545	0.61437	0.604261	0.561707	0.424561	0.523577	0.628072	0.59489	0.313181	0.305463	0.354203	0.610143	0.36142	0.512437	0.614774	0.406951	0.719569	0.805332
TCGA-CV-7103-11A-01R-2016-07	5.68614	low-FANCE	0.521069	0.58704	0.460558	0.404587	0.741532	0.504858	0.45869	0.529235	0.408132	0.271162	0.40761	0.366851	0.120235	0.206934	0.417777	0.514149	0.568309	0.614802	0.522197	0.347364	0.460383	0.616512	0.623553	0.274379	0.193338	0.313963	0.595898	0.247368	0.432503	0.604228	0.394571	0.600406	0.630997
TCGA-CV-6955-01A-11R-2016-07	5.69234	low-FANCE	0.634545	0.605825	0.549893	0.511718	0.762347	0.455421	0.493786	0.578024	0.439629	0.346121	0.449049	0.465333	0.139742	0.305582	0.409637	0.517031	0.560237	0.596407	0.616776	0.37033	0.565674	0.611876	0.632592	0.355829	0.250505	0.373213	0.620142	0.448953	0.596896	0.735967	0.497969	0.908232	0.892526
TCGA-D6-6516-01A-11R-1873-07	5.70566	low-FANCE	0.63733	0.610127	0.521452	0.510317	0.767494	0.471396	0.472051	0.588255	0.437269	0.318827	0.490331	0.457701	0.182633	0.289849	0.373245	0.525257	0.597872	0.584079	0.622178	0.386616	0.565403	0.592475	0.612063	0.336325	0.220321	0.39962	0.618314	0.326906	0.54525	0.672	0.470231	0.941065	0.927192
TCGA-CV-6956-11A-01R-2016-07	5.71511	low-FANCE	0.562095	0.586969	0.529074	0.470507	0.721716	0.458624	0.43497	0.53305	0.430062	0.352159	0.440867	0.309609	0.0987442	0.194991	0.336988	0.537533	0.593551	0.601467	0.544097	0.373779	0.523663	0.613077	0.647312	0.300049	0.243912	0.286032	0.601212	0.389208	0.443447	0.603628	0.399944	0.749794	0.594946
TCGA-D6-A6EN-01A-11R-A31N-07	5.71548	low-FANCE	0.766263	0.577424	0.586051	0.603301	0.778667	0.458991	0.472957	0.60075	0.499344	0.339923	0.466033	0.552482	0.271194	0.364539	0.38559	0.583745	0.62096	0.578144	0.719678	0.458847	0.554043	0.603541	0.625164	0.433008	0.254284	0.379898	0.650027	0.286119	0.728809	0.718552	0.61973	0.969649	0.869463
TCGA-D6-A6EQ-01A-11R-A31N-07	5.73397	low-FANCE	0.613784	0.624538	0.518677	0.473619	0.759559	0.461047	0.456701	0.604426	0.444934	0.309931	0.438836	0.51552	0.22743	0.268518	0.397629	0.534356	0.59709	0.634024	0.651902	0.433437	0.535879	0.617708	0.596164	0.380696	0.258997	0.377636	0.609653	0.308581	0.629317	0.601358	0.493905	0.826114	0.693591
TCGA-CQ-6224-01A-11R-1915-07	5.73487	low-FANCE	0.5038	0.655618	0.51875	0.457892	0.800822	0.475574	0.500326	0.584014	0.46807	0.299186	0.405474	0.541579	0.16656	0.306014	0.450715	0.613161	0.604354	0.64784	0.649207	0.448033	0.536611	0.625257	0.597114	0.374856	0.174695	0.277836	0.602948	0.136979	0.676792	0.729731	0.490636	0.927514	0.945632
TCGA-BA-A6DB-01A-11R-A30B-07	5.81355	low-FANCE	0.733907	0.618357	0.574355	0.529205	0.807628	0.516479	0.525393	0.619324	0.481479	0.307629	0.430001	0.546327	0.284641	0.359413	0.365609	0.596647	0.606349	0.621653	0.69666	0.447801	0.537233	0.625231	0.629263	0.378302	0.275108	0.423231	0.621618	0.341927	0.669773	0.804725	0.668816	0.928782	0.907281
TCGA-QK-A6IJ-01A-11R-A31N-07	5.83562	low-FANCE	0.605806	0.577417	0.53048	0.466785	0.73707	0.439349	0.438721	0.595735	0.410788	0.340277	0.396875	0.514232	0.204866	0.261778	0.337049	0.528722	0.607046	0.578618	0.636045	0.395683	0.531245	0.631815	0.617373	0.367358	0.187837	0.322831	0.640298	0.432768	0.581405	0.597513	0.472067	0.878523	0.810606
TCGA-CV-6938-01A-11R-1915-07	5.83575	low-FANCE	0.67637	0.650957	0.578715	0.542697	0.801003	0.481263	0.521323	0.633021	0.487206	0.341175	0.501996	0.584813	0.160735	0.370399	0.393945	0.523742	0.6295	0.587213	0.729291	0.450335	0.547429	0.572644	0.652054	0.435788	0.221311	0.30927	0.633599	0.320734	0.743715	0.829049	0.584362	0.991719	0.980975
TCGA-CV-5977-01A-11R-1686-07	5.8654	low-FANCE	0.48192	0.582703	0.433601	0.506568	0.755403	0.462247	0.427253	0.558137	0.409387	0.273386	0.453374	0.404138	0.0980707	0.209449	0.390519	0.514989	0.596349	0.562155	0.52267	0.412466	0.510474	0.595732	0.569269	0.289753	0.166555	0.286756	0.572527	0.356032	0.437998	0.51853	0.295403	0.962747	0.949583
TCGA-CN-6016-01A-11R-1686-07	5.95348	low-FANCE	0.569542	0.66159	0.526565	0.336435	0.823438	0.489015	0.504766	0.576877	0.490316	0.344819	0.386265	0.527064	0.130057	0.300482	0.37572	0.620022	0.590058	0.643694	0.653292	0.460287	0.546307	0.630592	0.614554	0.376569	0.187092	0.33811	0.624514	0.197057	0.635431	0.717133	0.473603	0.84748	0.859839
TCGA-HD-7753-01A-11R-2081-07	5.95756	low-FANCE	0.530006	0.64058	0.463989	0.54555	0.777147	0.491676	0.411539	0.589782	0.428321	0.31969	0.469673	0.502035	0.135367	0.258748	0.452309	0.553539	0.612433	0.620065	0.563613	0.436742	0.503451	0.617469	0.592164	0.319562	0.16747	0.358384	0.611342	0.344436	0.483899	0.65011	0.444314	0.831141	0.833763
TCGA-F7-A61S-01A-11R-A28V-07	5.98932	low-FANCE	0.661634	0.583661	0.53221	0.561477	0.786197	0.472117	0.462662	0.615281	0.441331	0.312234	0.458755	0.473199	0.217814	0.301703	0.384341	0.496376	0.624891	0.583602	0.643638	0.457238	0.518836	0.610759	0.604432	0.306603	0.197535	0.305578	0.589256	0.368109	0.592864	0.70291	0.507794	0.966833	0.984981
TCGA-CQ-5330-01A-01R-1686-07	6.0184	low-FANCE	0.606056	0.651406	0.574883	0.548754	0.811398	0.471671	0.534078	0.606891	0.479843	0.301045	0.430982	0.61561	0.223576	0.35071	0.411954	0.624622	0.606891	0.608469	0.737927	0.47261	0.533627	0.632153	0.626653	0.414865	0.20189	0.325167	0.623469	0.245405	0.750234	0.828904	0.591077	0.984499	0.920826
TCGA-MZ-A7D7-01A-21R-A34R-07	6.07174	low-FANCE	0.460195	0.529939	0.407203	0.484291	0.733553	0.432881	0.416506	0.527268	0.37849	0.297821	0.434601	0.334853	0.0918682	0.148191	0.396633	0.449271	0.584813	0.576837	0.416454	0.388084	0.512054	0.575273	0.62446	0.262175	0.211073	0.295784	0.5734	0.348906	0.364888	0.433497	0.243106	0.661566	0.757984
TCGA-BB-8596-01A-11R-2403-07	6.07196	low-FANCE	0.479404	0.663072	0.498184	0.500758	0.804541	0.493463	0.486743	0.598691	0.493339	0.294426	0.454366	0.549284	0.186283	0.294398	0.424554	0.595271	0.590326	0.651343	0.653665	0.458422	0.503677	0.672078	0.642752	0.407833	0.300097	0.403871	0.621852	0.217562	0.673325	0.763907	0.513126	0.701144	0.587407
TCGA-CV-7425-11A-01R-2081-07	6.08632	low-FANCE	0.649806	0.597585	0.535525	0.528568	0.768918	0.469045	0.511901	0.621306	0.445748	0.320319	0.44035	0.463117	0.248422	0.320662	0.379641	0.492575	0.585929	0.594212	0.653435	0.383569	0.523227	0.610329	0.612774	0.342904	0.206303	0.454274	0.638865	0.42047	0.594323	0.720721	0.580034	0.936483	0.856657
TCGA-CQ-6227-01A-11R-1915-07	6.08921	low-FANCE	0.495054	0.6572	0.474522	0.477695	0.783127	0.502297	0.469739	0.592552	0.439281	0.286972	0.450397	0.458539	0.17404	0.249501	0.380488	0.583014	0.606351	0.587107	0.557285	0.44511	0.510919	0.642117	0.617954	0.313412	0.215393	0.390214	0.605076	0.324551	0.509141	0.57654	0.409689	0.74083	0.737009
TCGA-BA-A6DG-01A-21R-A30B-07	6.08969	low-FANCE	0.547123	0.674648	0.496881	0.457548	0.796192	0.493136	0.500632	0.634887	0.467371	0.323082	0.375954	0.620253	0.075875	0.239668	0.36742	0.57899	0.609874	0.67194	0.66022	0.470394	0.557516	0.690835	0.644337	0.410032	0.19038	0.347926	0.626865	0.377983	0.63779	0.763677	0.495166	0.646761	0.550816
TCGA-CR-6484-01A-11R-1873-07	6.12741	low-FANCE	0.62393	0.648682	0.591211	0.611864	0.805895	0.503448	0.525866	0.616064	0.512319	0.346396	0.446024	0.609383	0.314838	0.385197	0.366852	0.617051	0.576737	0.639418	0.752869	0.432737	0.586394	0.628129	0.628746	0.430259	0.272987	0.395709	0.630697	0.41495	0.760417	0.841441	0.619495	0.928332	0.881203
TCGA-CV-5978-01A-11R-1686-07	6.15352	low-FANCE	0.491792	0.668567	0.495115	0.508498	0.794875	0.470452	0.519464	0.637439	0.460282	0.297277	0.430601	0.632561	0.135608	0.333904	0.436672	0.584016	0.606898	0.600162	0.710512	0.447417	0.5386	0.643482	0.650075	0.451181	0.186359	0.407881	0.617027	0.178636	0.776399	0.838575	0.519714	0.646547	0.940713
TCGA-MT-A67D-01A-31R-A30B-07	6.15993	low-FANCE	0.532811	0.626836	0.496488	0.57079	0.779899	0.49475	0.477698	0.587278	0.451883	0.352503	0.41163	0.473977	0.321957	0.317313	0.378989	0.535964	0.575638	0.631233	0.609043	0.416268	0.485617	0.64031	0.613025	0.335508	0.303325	0.386933	0.598537	0.413509	0.562339	0.666039	0.48481	0.796425	0.90418
TCGA-CV-6953-01A-11R-1915-07	6.20978	low-FANCE	0.568587	0.596573	0.490987	0.47401	0.761457	0.493518	0.458366	0.586685	0.436385	0.309011	0.41638	0.472494	0.22819	0.327603	0.329377	0.50375	0.585021	0.59703	0.621861	0.366664	0.527483	0.623842	0.600688	0.306587	0.282817	0.334964	0.627303	0.393547	0.542897	0.674551	0.462028	0.632878	0.555731
TCGA-CN-4733-01A-02R-1873-07	6.22033	low-FANCE	0.733586	0.660559	0.617728	0.642349	0.83136	0.543521	0.540688	0.627838	0.556823	0.301406	0.486131	0.656903	0.443991	0.491374	0.450352	0.632422	0.600417	0.584919	0.78954	0.506101	0.579945	0.64231	0.625512	0.408727	0.333597	0.527002	0.658796	0.27614	0.771367	0.910171	0.758384	0.983086	0.928387
TCGA-CR-7389-01A-11R-2016-07	6.22106	low-FANCE	0.447503	0.620872	0.499712	0.42351	0.766491	0.467066	0.47751	0.62694	0.44112	0.311914	0.444806	0.491779	0.240657	0.323408	0.399034	0.565679	0.561622	0.600129	0.604085	0.389872	0.519964	0.66665	0.62676	0.351823	0.236266	0.374085	0.628623	0.352797	0.580885	0.723099	0.441489	0.746023	0.898106
TCGA-HD-7831-01A-11R-2132-07	6.23189	low-FANCE	0.429087	0.651298	0.476791	0.40752	0.793091	0.469853	0.444944	0.605499	0.429961	0.279032	0.404736	0.518508	0.108624	0.224841	0.426487	0.574655	0.581457	0.592385	0.611136	0.450111	0.524995	0.618137	0.597566	0.364909	0.197482	0.382163	0.61421	0.194616	0.551246	0.617289	0.366125	0.652684	0.43065
TCGA-CN-4740-01A-01R-1436-07	6.23464	low-FANCE	0.596468	0.705947	0.544898	0.561335	0.800524	0.553533	0.572663	0.664675	0.510746	0.313707	0.456239	0.629946	0.14422	0.32646	0.439299	0.619171	0.574066	0.620529	0.745028	0.467465	0.53835	0.652986	0.646622	0.462319	0.301693	0.516512	0.614579	0.351775	0.774836	0.834844	0.569767	0.808179	0.692195
TCGA-H7-A6C4-01A-11R-A30B-07	6.26613	low-FANCE	0.527464	0.61776	0.515265	0.530621	0.785111	0.48394	0.486812	0.57351	0.444374	0.330181	0.429421	0.478946	0.183749	0.28329	0.381268	0.56018	0.608258	0.605991	0.571124	0.426285	0.519455	0.63481	0.607643	0.303873	0.29855	0.409341	0.601024	0.450057	0.503443	0.636481	0.43933	0.907737	0.911849
TCGA-CV-7438-11A-01R-2132-07	6.27202	low-FANCE	0.63261	0.569514	0.525551	0.505207	0.76026	0.464907	0.461725	0.549933	0.439951	0.30882	0.424921	0.392577	0.287313	0.341891	0.407797	0.52803	0.568466	0.616699	0.603405	0.375316	0.520941	0.614551	0.632909	0.323916	0.251168	0.329161	0.610466	0.323062	0.522643	0.733457	0.549865	0.839267	0.796045
TCGA-CN-A63T-01A-11R-A28V-07	6.29942	low-FANCE	0.625574	0.611258	0.523384	0.588878	0.780071	0.496615	0.486284	0.599123	0.451481	0.339668	0.399212	0.482655	0.185858	0.270173	0.383378	0.541753	0.598389	0.595209	0.649977	0.423536	0.542223	0.63246	0.627403	0.321018	0.21465	0.323653	0.597267	0.331256	0.608049	0.692785	0.523758	0.889584	0.869797
TCGA-F7-A623-01A-11R-A28V-07	6.30298	low-FANCE	0.524201	0.562681	0.477721	0.568668	0.740951	0.469302	0.416156	0.5811	0.392611	0.344311	0.414369	0.416585	0.173563	0.22943	0.369484	0.473975	0.560755	0.540433	0.553664	0.371363	0.491448	0.618475	0.600251	0.282999	0.224548	0.269504	0.577466	0.36417	0.467471	0.584416	0.383854	0.815951	0.913691
TCGA-CR-7373-01A-11R-2016-07	6.34847	low-FANCE	0.637366	0.605251	0.550213	0.604478	0.799693	0.498821	0.47715	0.613692	0.465768	0.308146	0.500889	0.552413	0.230233	0.336659	0.408426	0.570806	0.630773	0.565207	0.711948	0.473932	0.525319	0.607163	0.62978	0.374196	0.239396	0.359924	0.613915	0.266266	0.673024	0.806701	0.553788	0.984988	0.964597
TCGA-CV-7183-11A-01R-2016-07	6.36134	low-FANCE	0.544196	0.56239	0.45188	0.422557	0.714731	0.482461	0.449271	0.536788	0.390991	0.282335	0.396335	0.327168	0.0761692	0.167772	0.383985	0.445945	0.566339	0.605669	0.474116	0.314056	0.471956	0.566011	0.629579	0.289628	0.2439	0.33078	0.593789	0.311787	0.417473	0.635115	0.355955	0.549461	0.549227
TCGA-CV-A45P-01A-11R-A24H-07	6.40144	low-FANCE	0.506921	0.552565	0.462795	0.483357	0.746083	0.463109	0.42262	0.554553	0.400084	0.335189	0.443745	0.387367	0.0902452	0.193688	0.328604	0.492215	0.579192	0.588986	0.491331	0.361833	0.480408	0.641002	0.605592	0.248703	0.233599	0.320083	0.596754	0.434333	0.351631	0.511132	0.308247	0.866481	0.870661
TCGA-P3-A6T0-01A-12R-A34R-07	6.41305	low-FANCE	0.448578	0.583437	0.397818	0.440165	0.757316	0.451394	0.361751	0.521958	0.37918	0.249587	0.42161	0.427413	0.0581271	0.166197	0.390272	0.47095	0.559632	0.591178	0.460491	0.445258	0.479188	0.594812	0.610241	0.24697	0.138751	0.260986	0.595047	0.195979	0.386955	0.459563	0.229675	0.508182	0.448356
TCGA-CR-6492-01A-12R-2081-07	6.41341	low-FANCE	0.525951	0.617051	0.502205	0.499546	0.762281	0.471703	0.449112	0.583466	0.421079	0.345299	0.440668	0.442511	0.235207	0.299694	0.386264	0.542663	0.607886	0.60436	0.600586	0.387336	0.519352	0.633844	0.635085	0.334231	0.218593	0.374196	0.605502	0.416407	0.553987	0.66805	0.434462	0.934969	0.941044
TCGA-CQ-A4C6-01A-11R-A24Z-07	6.41668	low-FANCE	0.565248	0.613496	0.5366	0.551656	0.779667	0.495367	0.478045	0.583298	0.42247	0.305558	0.461068	0.4983	0.146309	0.288064	0.400807	0.537224	0.616783	0.602028	0.624738	0.434805	0.504389	0.635317	0.595828	0.311379	0.231651	0.38705	0.580325	0.388902	0.562431	0.672182	0.461984	0.980534	0.969899
TCGA-QK-AA3K-01A-11R-A39I-07	6.43004	low-FANCE	0.608121	0.632658	0.52573	0.577827	0.762555	0.484193	0.427334	0.596408	0.479613	0.244255	0.450814	0.556922	0.125892	0.270764	0.450765	0.568436	0.555513	0.619208	0.649214	0.45328	0.516779	0.618059	0.560982	0.412121	0.268483	0.322873	0.606949	0.123969	0.647923	0.691542	0.520317	0.776125	0.755915
TCGA-T3-A92N-01A-11R-A39I-07	6.44407	low-FANCE	0.545721	0.626534	0.504042	0.551579	0.724686	0.446574	0.404319	0.566411	0.42716	0.314804	0.456592	0.455683	0.0984075	0.262649	0.367364	0.527292	0.600215	0.60459	0.600669	0.396431	0.541163	0.590516	0.607142	0.336811	0.196097	0.258714	0.580973	0.221664	0.540555	0.661814	0.371122	0.931104	0.919834
TCGA-CV-7177-11A-01R-2016-07	6.44848	low-FANCE	0.488501	0.56194	0.463267	0.434164	0.734102	0.476234	0.435616	0.538555	0.361062	0.29219	0.398736	0.378966	0.0909628	0.196637	0.375631	0.495116	0.589076	0.595914	0.479067	0.347522	0.461411	0.620544	0.639861	0.269044	0.226441	0.377906	0.587493	0.362738	0.370177	0.612157	0.297347	0.772786	0.827235
TCGA-CV-7416-01A-11R-2081-07	6.45192	low-FANCE	0.424549	0.667386	0.450423	0.475874	0.776604	0.454981	0.427321	0.590637	0.407712	0.277728	0.451597	0.512668	0.0700411	0.262999	0.446868	0.523	0.579873	0.563479	0.583214	0.44291	0.486397	0.626401	0.607141	0.33772	0.218182	0.31701	0.603846	0.226321	0.595464	0.615153	0.342137	0.696196	0.868289
TCGA-MT-A51X-01A-11R-A266-07	6.4543	low-FANCE	0.507117	0.610207	0.44803	0.456273	0.782673	0.47896	0.432888	0.564464	0.40072	0.302342	0.438946	0.401152	0.145312	0.198003	0.353311	0.52113	0.595684	0.572224	0.490253	0.392663	0.474427	0.617371	0.595358	0.276153	0.230432	0.350432	0.602185	0.395706	0.40809	0.550175	0.343529	0.792185	0.77548
TCGA-UF-A7JS-01A-11R-A34R-07	6.45441	low-FANCE	0.623038	0.604178	0.526913	0.511866	0.7119	0.422476	0.446206	0.596123	0.443532	0.315762	0.384563	0.528506	0.182652	0.25253	0.364098	0.554381	0.592617	0.627624	0.670241	0.449904	0.529547	0.584966	0.572682	0.45552	0.241103	0.374767	0.63222	0.424662	0.655116	0.541635	0.492546	0.796813	0.923269
TCGA-CV-7424-11A-01R-2081-07	6.47855	low-FANCE	0.454009	0.564373	0.447607	0.356434	0.719573	0.491809	0.434343	0.545461	0.375158	0.312172	0.401645	0.325472	0.0550081	0.166314	0.397229	0.523309	0.561985	0.608498	0.465681	0.343793	0.468876	0.637734	0.66174	0.255498	0.247154	0.311056	0.583287	0.309063	0.352169	0.624545	0.260128	0.565048	0.795282
TCGA-BA-7269-01A-11R-2016-07	6.49048	low-FANCE	0.536154	0.605468	0.451123	0.408135	0.718444	0.430999	0.410561	0.572478	0.432932	0.325988	0.409793	0.410505	0.118405	0.163262	0.385446	0.518073	0.596106	0.639496	0.537966	0.398669	0.486009	0.615907	0.599763	0.387769	0.198999	0.334415	0.640405	0.209481	0.498735	0.506187	0.340203	0.597751	0.54455
TCGA-CV-A6JD-01A-11R-A31N-07	6.51674	low-FANCE	0.636439	0.600243	0.562645	0.500205	0.797832	0.441536	0.454188	0.589285	0.469234	0.287737	0.430641	0.544226	0.125852	0.307829	0.428448	0.611679	0.614137	0.601457	0.672594	0.440187	0.5681	0.597861	0.599188	0.40858	0.28673	0.307107	0.628225	0.167399	0.699976	0.72035	0.538444	0.969556	0.918896
TCGA-BA-5152-01A-02R-1873-07	6.54061	low-FANCE	0.646159	0.615195	0.545875	0.605722	0.807866	0.45855	0.458826	0.598686	0.469071	0.345888	0.44464	0.547962	0.228481	0.334595	0.442547	0.569733	0.611791	0.591903	0.673285	0.4437	0.538411	0.615007	0.631307	0.3825	0.259501	0.379746	0.611714	0.339061	0.650718	0.748903	0.568241	0.910533	0.938875
TCGA-CV-5444-01A-02R-1514-07	6.56888	low-FANCE	0.593756	0.656604	0.553591	0.507597	0.792148	0.501886	0.498953	0.609123	0.480968	0.319133	0.447047	0.573873	0.176332	0.326716	0.41698	0.600094	0.597223	0.610706	0.708681	0.457351	0.518604	0.633127	0.615574	0.386264	0.24687	0.362399	0.606839	0.208488	0.725172	0.789583	0.542412	0.928849	0.971925
TCGA-CV-A45X-01A-21R-A24Z-07	6.5742	low-FANCE	0.443824	0.578136	0.474105	0.486324	0.739393	0.436564	0.438473	0.575322	0.40083	0.322415	0.423675	0.37798	0.102438	0.225395	0.379473	0.501674	0.595781	0.593746	0.51084	0.362232	0.504076	0.617111	0.615883	0.273747	0.228273	0.278957	0.594126	0.434946	0.420433	0.555598	0.28964	0.652184	0.732536
TCGA-CV-7437-11A-01R-2132-07	6.58412	low-FANCE	0.542905	0.557858	0.479637	0.462316	0.722211	0.474702	0.442229	0.527644	0.379198	0.317489	0.413883	0.35897	0.271534	0.297461	0.414867	0.473719	0.559873	0.605619	0.526569	0.322682	0.490705	0.61353	0.646757	0.282504	0.250606	0.298864	0.599006	0.32563	0.45984	0.655907	0.427871	0.564217	0.611794
TCGA-CV-6934-11A-01R-1915-07	6.58527	low-FANCE	0.538621	0.549991	0.499537	0.374324	0.722359	0.378671	0.374528	0.485225	0.374309	0.351439	0.356725	0.327936	0.158433	0.21433	0.325858	0.517092	0.57006	0.59181	0.525421	0.317767	0.55152	0.619785	0.635438	0.251942	0.295782	0.211027	0.641494	0.281543	0.366323	0.66141	0.318416	0.77791	0.664681
TCGA-HD-8634-01A-11R-2403-07	6.59471	low-FANCE	0.473384	0.573713	0.489896	0.502713	0.750863	0.465671	0.423608	0.552623	0.429879	0.317037	0.453371	0.373021	0.157105	0.23551	0.386529	0.500482	0.584315	0.565036	0.524261	0.369883	0.512687	0.626262	0.621073	0.278729	0.199557	0.312504	0.597559	0.426851	0.421576	0.560376	0.355307	0.935569	0.950363
TCGA-IQ-A61J-01A-11R-A30B-07	6.60651	low-FANCE	0.546159	0.625513	0.510402	0.44169	0.790623	0.491093	0.490874	0.582536	0.437602	0.294201	0.442031	0.499796	0.110496	0.276536	0.401453	0.5986	0.609902	0.635497	0.614916	0.436879	0.534663	0.643367	0.608329	0.3229	0.209426	0.409093	0.596034	0.30715	0.581229	0.701808	0.439453	0.889546	0.853802
TCGA-CV-7183-01A-11R-2016-07	6.63104	low-FANCE	0.439428	0.573311	0.408446	0.379125	0.756545	0.461133	0.420505	0.565324	0.386105	0.28998	0.439674	0.357364	0.067679	0.151447	0.345661	0.48588	0.581752	0.605056	0.468683	0.355453	0.458052	0.627685	0.598329	0.23115	0.163887	0.325663	0.621739	0.458763	0.313565	0.450593	0.244634	0.645717	0.60878
TCGA-MZ-A5BI-01A-31R-A34R-07	6.7516	low-FANCE	0.674377	0.576324	0.585655	0.643863	0.776809	0.492734	0.503773	0.574846	0.531503	0.362121	0.489346	0.548651	0.413629	0.403776	0.401071	0.584563	0.602987	0.589508	0.705327	0.458313	0.611856	0.638846	0.632974	0.431618	0.255214	0.399311	0.628027	0.355092	0.703492	0.78721	0.675196	0.890764	0.73441
TCGA-CV-7254-01A-11R-2016-07	6.77018	low-FANCE	0.661567	0.637765	0.554085	0.584691	0.805659	0.509414	0.508924	0.60306	0.51342	0.290886	0.433303	0.567378	0.405603	0.4506	0.453471	0.568565	0.617587	0.588064	0.72079	0.452509	0.534749	0.645765	0.634015	0.478928	0.272112	0.469889	0.631456	0.145534	0.739487	0.847582	0.643625	0.80317	0.612306
TCGA-CV-7099-01A-41R-2016-07	6.78219	low-FANCE	0.603728	0.632048	0.538098	0.599333	0.796956	0.474199	0.448243	0.582991	0.458769	0.306319	0.506156	0.491172	0.142402	0.31318	0.372767	0.52399	0.582292	0.61619	0.652877	0.430366	0.544142	0.599994	0.63548	0.356279	0.270397	0.381741	0.608224	0.374941	0.616345	0.716794	0.46631	0.969572	0.950988
TCGA-CQ-7072-01A-21R-A30B-07	6.79973	low-FANCE	0.452438	0.633912	0.484775	0.379641	0.785178	0.51713	0.444975	0.564112	0.431821	0.25561	0.406677	0.494318	0.0780245	0.203239	0.459941	0.573228	0.579835	0.64348	0.541037	0.446664	0.492884	0.626082	0.599945	0.321551	0.139693	0.238251	0.599156	0.093852	0.507121	0.572412	0.349908	0.519081	0.422311
TCGA-CX-7219-01A-11R-2016-07	6.87915	low-FANCE	0.531018	0.651397	0.530652	0.585228	0.780351	0.43414	0.491212	0.607267	0.462248	0.30752	0.454881	0.555681	0.178862	0.300511	0.370986	0.578827	0.554181	0.580434	0.662709	0.436526	0.554708	0.647748	0.616622	0.361946	0.321462	0.365163	0.608472	0.359697	0.6452	0.778574	0.486591	0.92014	0.787544
TCGA-D6-6825-01A-21R-1915-07	6.88314	low-FANCE	0.644553	0.647693	0.601622	0.591285	0.79378	0.512274	0.520367	0.636061	0.471522	0.351998	0.470762	0.573249	0.23233	0.378588	0.409321	0.587037	0.590627	0.584653	0.7297	0.458154	0.546653	0.65775	0.626961	0.354634	0.24389	0.406602	0.597836	0.39608	0.715361	0.870944	0.624326	0.979454	0.945099
TCGA-QK-A6IF-01A-11R-A31N-07	6.88811	low-FANCE	0.708294	0.560049	0.52606	0.672061	0.790107	0.461823	0.438572	0.525525	0.512173	0.289173	0.461805	0.449251	0.574233	0.569403	0.355331	0.574129	0.59322	0.587985	0.687328	0.440143	0.533111	0.646038	0.606495	0.323375	0.327851	0.342843	0.60973	0.107225	0.599488	0.852347	0.712331	0.884413	0.72635
TCGA-CV-7413-01A-11R-2081-07	6.89315	low-FANCE	0.53269	0.642375	0.470048	0.441922	0.807724	0.464679	0.473253	0.62929	0.441622	0.325327	0.40757	0.500719	0.10931	0.275652	0.391137	0.555943	0.591347	0.599228	0.625135	0.425788	0.559498	0.630897	0.6198	0.368209	0.15331	0.297473	0.613446	0.346579	0.60582	0.649472	0.449008	0.875206	0.806053
TCGA-CR-7380-01A-11R-2016-07	6.91401	low-FANCE	0.497272	0.665291	0.473111	0.482318	0.785874	0.488967	0.473945	0.642003	0.447527	0.300151	0.466693	0.520408	0.173241	0.281126	0.404013	0.56282	0.630751	0.566914	0.601917	0.410907	0.496933	0.617741	0.623304	0.347049	0.202164	0.461389	0.623668	0.249133	0.572066	0.701004	0.432684	0.791409	0.911409
TCGA-CQ-A4CH-01A-11R-A266-07	6.91484	low-FANCE	0.422536	0.621199	0.396384	0.478277	0.78094	0.42752	0.434493	0.595294	0.40645	0.313665	0.411948	0.499218	0.130647	0.247323	0.375528	0.518458	0.621546	0.59493	0.557453	0.425654	0.499819	0.623901	0.627056	0.336241	0.199113	0.328656	0.601515	0.359806	0.514219	0.640649	0.342747	0.57063	0.759616
TCGA-D6-A6EK-01A-11R-A31N-07	6.95833	low-FANCE	0.705037	0.578541	0.572441	0.513629	0.752622	0.458764	0.476681	0.618402	0.456576	0.320271	0.434784	0.487408	0.252331	0.323574	0.362709	0.525499	0.571756	0.603595	0.668733	0.394364	0.539081	0.624252	0.587544	0.345288	0.230242	0.322801	0.647403	0.372606	0.607798	0.663793	0.596127	0.919318	0.870828
TCGA-CN-4722-01A-01R-1436-07	6.98074	low-FANCE	0.498385	0.613944	0.463079	0.420206	0.767069	0.493529	0.463235	0.596205	0.442527	0.295413	0.439948	0.387236	0.17532	0.264305	0.382984	0.535015	0.555585	0.593777	0.55452	0.367034	0.490538	0.63621	0.600387	0.271431	0.186897	0.320388	0.618106	0.351719	0.436925	0.624108	0.418654	0.490126	0.498391
TCGA-CV-7255-11A-01R-2016-07	6.99347	low-FANCE	0.540659	0.592891	0.498497	0.510329	0.735779	0.443008	0.412408	0.505984	0.420953	0.352871	0.440534	0.371055	0.136613	0.236252	0.3956	0.559206	0.584323	0.613132	0.550183	0.37554	0.495278	0.612571	0.662807	0.293485	0.362463	0.442255	0.614966	0.32924	0.448988	0.691185	0.406392	0.759098	0.673775
TCGA-CN-4734-01A-01R-1436-07	7.01238	low-FANCE	0.645673	0.628817	0.555075	0.593219	0.798432	0.503102	0.498997	0.594125	0.478493	0.347812	0.465713	0.531875	0.176758	0.343448	0.437696	0.565026	0.588941	0.590204	0.675974	0.447241	0.601884	0.613549	0.614322	0.321849	0.273565	0.385991	0.62123	0.365062	0.620445	0.785906	0.558561	0.962634	0.934353
TCGA-CV-6960-01A-41R-2016-07	7.02549	low-FANCE	0.410635	0.595925	0.431961	0.437381	0.754932	0.439076	0.397544	0.530294	0.381968	0.29636	0.4408	0.376845	0.0483506	0.175149	0.432466	0.492328	0.587925	0.596958	0.459595	0.424711	0.509855	0.612782	0.615762	0.251404	0.108752	0.298732	0.582141	0.293343	0.342401	0.486438	0.219735	0.46929	0.67486
TCGA-QK-A652-01A-11R-A30B-07	7.03586	low-FANCE	0.574217	0.605516	0.523949	0.48205	0.779251	0.497375	0.488516	0.608877	0.429703	0.314415	0.43103	0.470261	0.20392	0.300454	0.376074	0.563891	0.596323	0.61366	0.612435	0.408869	0.519698	0.644538	0.603898	0.339937	0.211871	0.316089	0.591339	0.424807	0.5714	0.68368	0.506549	0.934959	0.971303
TCGA-CV-7180-01A-11R-2016-07	7.05652	low-FANCE	0.538202	0.564881	0.421906	0.506519	0.743159	0.451768	0.4063	0.547277	0.388734	0.294176	0.466476	0.366096	0.115814	0.17448	0.414015	0.461439	0.597415	0.571948	0.488499	0.363119	0.47254	0.586835	0.616683	0.264515	0.247146	0.340491	0.607802	0.334324	0.350832	0.523402	0.322893	0.791769	0.716687
TCGA-CV-6942-01A-21R-2016-07	7.06613	low-FANCE	0.686198	0.641188	0.568889	0.604897	0.81389	0.524451	0.481049	0.617545	0.502868	0.303408	0.451279	0.57564	0.378019	0.453799	0.387568	0.588786	0.605555	0.588452	0.720363	0.466413	0.524859	0.641245	0.620139	0.404955	0.27866	0.449177	0.618885	0.314569	0.698213	0.862752	0.632357	0.976717	0.954449
TCGA-C9-A480-01A-12R-A24H-07	7.12721	low-FANCE	0.533824	0.571082	0.457022	0.443518	0.760608	0.427753	0.437421	0.543836	0.411128	0.305358	0.434167	0.437197	0.121431	0.23381	0.325263	0.513238	0.593769	0.61083	0.517259	0.410284	0.517241	0.613168	0.609549	0.28768	0.234905	0.327061	0.599325	0.324355	0.425752	0.579092	0.354804	0.933797	0.945188
TCGA-CV-7104-01A-11R-2016-07	7.13598	low-FANCE	0.517214	0.666827	0.519149	0.514197	0.79277	0.461687	0.501207	0.602552	0.474872	0.33075	0.450259	0.546042	0.179238	0.330188	0.401212	0.598319	0.599148	0.59022	0.659165	0.464476	0.554165	0.635566	0.630935	0.370229	0.282112	0.385612	0.613871	0.37259	0.655623	0.749898	0.488096	0.934484	0.969271
TCGA-CV-6003-01A-11R-1686-07	7.1622	low-FANCE	0.44771	0.583547	0.399304	0.501201	0.742853	0.446025	0.392414	0.564685	0.375204	0.263993	0.443682	0.425169	0.14203	0.209737	0.348603	0.474978	0.583143	0.584456	0.492788	0.402473	0.522928	0.593623	0.585444	0.31514	0.132056	0.27709	0.59863	0.300446	0.39713	0.479962	0.296643	0.858276	0.900156
TCGA-CN-5358-01A-01R-1514-07	7.16504	low-FANCE	0.679637	0.716179	0.619041	0.589329	0.8165	0.54609	0.554947	0.64067	0.531693	0.319799	0.471366	0.653466	0.372569	0.446936	0.430109	0.638112	0.582857	0.627136	0.779188	0.50285	0.579007	0.688597	0.639995	0.445246	0.317737	0.520445	0.656963	0.409087	0.784941	0.91246	0.713917	0.863424	0.766143
TCGA-CV-A6JE-01A-11R-A31N-07	7.17601	low-FANCE	0.697746	0.59355	0.531752	0.471951	0.756493	0.423207	0.447774	0.58891	0.429843	0.304416	0.380481	0.465504	0.154675	0.256283	0.380482	0.531106	0.622112	0.634953	0.635093	0.436817	0.516849	0.618173	0.579779	0.370205	0.24959	0.280601	0.623163	0.269622	0.597933	0.595893	0.483336	0.892242	0.854068
TCGA-CV-7245-01A-11R-2016-07	7.17766	low-FANCE	0.48964	0.607411	0.446947	0.508138	0.753593	0.461393	0.410149	0.57543	0.394687	0.329449	0.447227	0.419748	0.0732395	0.158724	0.363273	0.514183	0.573727	0.582106	0.472736	0.40447	0.527781	0.619798	0.576243	0.257071	0.229445	0.342208	0.57899	0.296493	0.365267	0.512846	0.312615	0.613195	0.649216
TCGA-CQ-A4C7-01A-11R-A24Z-07	7.21671	low-FANCE	0.510927	0.623345	0.483562	0.51235	0.776973	0.448907	0.436628	0.602175	0.419083	0.286527	0.433275	0.465545	0.0335444	0.221335	0.391865	0.600771	0.601756	0.588114	0.5743	0.439397	0.529362	0.603656	0.593635	0.321011	0.215192	0.256484	0.587287	0.250211	0.481805	0.581627	0.326411	0.941983	0.900426
TCGA-CN-6989-01A-11R-1915-07	7.22266	low-FANCE	0.480374	0.677368	0.525759	0.524428	0.804654	0.502777	0.501499	0.633885	0.485891	0.283982	0.454155	0.638793	0.130191	0.296691	0.444478	0.595695	0.603063	0.634503	0.71005	0.489047	0.562162	0.641685	0.624319	0.443985	0.231813	0.403604	0.599644	0.163802	0.739019	0.823995	0.517673	0.630595	0.723575
TCGA-CV-6950-01A-11R-1915-07	7.26404	low-FANCE	0.491139	0.636124	0.471627	0.499836	0.780039	0.521267	0.435762	0.604749	0.436321	0.28735	0.442906	0.460671	0.0794339	0.268744	0.415226	0.566912	0.587768	0.613862	0.583528	0.467082	0.494751	0.626155	0.592869	0.296797	0.167809	0.32632	0.595035	0.220756	0.496771	0.596813	0.347254	0.904141	0.821847
TCGA-UF-A7JD-01A-11R-A34R-07	7.26443	low-FANCE	0.451548	0.620924	0.408697	0.555694	0.764198	0.43891	0.417852	0.579272	0.420261	0.237164	0.387702	0.538518	0.0877657	0.220102	0.406035	0.5895	0.565534	0.588385	0.564061	0.444765	0.499964	0.614777	0.610727	0.329908	0.271984	0.385548	0.597059	0.201136	0.486531	0.546699	0.313758	0.615283	0.604186
TCGA-CQ-5331-01A-02R-1873-07	7.26845	low-FANCE	0.659068	0.598807	0.596897	0.58099	0.798711	0.472911	0.510022	0.621615	0.473034	0.34187	0.475269	0.530605	0.286334	0.392621	0.359804	0.565532	0.577562	0.555663	0.70707	0.429158	0.570044	0.627107	0.620347	0.358362	0.240857	0.35374	0.630021	0.425458	0.696416	0.826404	0.603072	0.994847	0.979976
TCGA-CV-6962-11A-01R-1915-07	7.27235	low-FANCE	0.510569	0.604027	0.493944	0.378979	0.741345	0.490808	0.458435	0.558893	0.393909	0.305873	0.404372	0.386564	0.112422	0.210034	0.408438	0.533023	0.565906	0.608294	0.499962	0.375668	0.478267	0.628153	0.625395	0.308962	0.276211	0.389265	0.597923	0.308884	0.44186	0.629427	0.32655	0.714297	0.670851
TCGA-HD-A633-01A-11R-A28V-07	7.27954	low-FANCE	0.464453	0.594682	0.431345	0.525826	0.756339	0.450593	0.422842	0.558503	0.41698	0.294979	0.426197	0.401639	0.0847086	0.177899	0.431416	0.546072	0.613991	0.599265	0.5203	0.405348	0.499424	0.603711	0.606012	0.291283	0.204408	0.266179	0.591817	0.318168	0.449359	0.532752	0.294745	0.589541	0.54147
TCGA-T2-A6WZ-01A-21R-A34R-07	7.29638	low-FANCE	0.57663	0.57608	0.486554	0.479246	0.710271	0.421326	0.413937	0.549645	0.416136	0.287549	0.419468	0.402156	0.294602	0.26524	0.358658	0.474335	0.608795	0.62585	0.567529	0.410865	0.484411	0.599231	0.552879	0.325292	0.283402	0.287135	0.594224	0.316215	0.478981	0.510254	0.411107	0.724138	0.865168
TCGA-CQ-5327-01A-01R-1686-07	7.29745	low-FANCE	0.656495	0.618966	0.567165	0.568242	0.792727	0.476543	0.513551	0.616596	0.46908	0.32775	0.443395	0.527093	0.224128	0.350129	0.368064	0.580232	0.60105	0.581603	0.706307	0.442641	0.558376	0.615423	0.611839	0.393694	0.198139	0.317787	0.641153	0.378625	0.712159	0.780644	0.567136	0.978139	0.871523
TCGA-D6-A6EM-01A-21R-A31N-07	7.29915	low-FANCE	0.703922	0.59309	0.577329	0.544079	0.755711	0.501527	0.487827	0.639223	0.470895	0.280197	0.441967	0.56071	0.292798	0.325459	0.351727	0.573008	0.614769	0.594226	0.706179	0.444297	0.519789	0.591411	0.620274	0.426655	0.202644	0.387274	0.635834	0.257034	0.6926	0.70279	0.565746	0.959639	0.906691
TCGA-HD-A634-01A-11R-A28V-07	7.30647	low-FANCE	0.42176	0.530087	0.301215	0.473718	0.651079	0.446378	0.271347	0.495233	0.329888	0.282533	0.391546	0.289466	0.0618351	0.101377	0.403566	0.474546	0.536346	0.53667	0.377548	0.307615	0.403824	0.601997	0.579816	0.230977	0.179559	0.175783	0.636015	0.0401847	0.277399	0.406784	0.131488	0.384679	0.207307
TCGA-F7-A622-01A-11R-A28V-07	7.32255	low-FANCE	0.472019	0.57804	0.425914	0.494499	0.73357	0.465769	0.420485	0.578096	0.381934	0.301766	0.450536	0.344785	0.0664144	0.176005	0.362385	0.488899	0.612386	0.593026	0.493166	0.394638	0.494513	0.577945	0.629017	0.294157	0.130476	0.2898	0.602916	0.377215	0.406389	0.46827	0.250839	0.807805	0.939795
TCGA-BB-A6UO-01A-12R-A34R-07	7.33149	low-FANCE	0.529173	0.609017	0.450738	0.52561	0.775493	0.472831	0.450967	0.594634	0.419875	0.308089	0.429022	0.467759	0.0184816	0.212021	0.390134	0.531771	0.596792	0.594187	0.565382	0.437911	0.513891	0.608594	0.588936	0.32164	0.226556	0.270001	0.588398	0.302467	0.51827	0.586493	0.344369	0.836376	0.906916
TCGA-CN-5359-01A-01R-1436-07	7.37455	low-FANCE	0.639894	0.692369	0.568022	0.591712	0.810254	0.476495	0.515845	0.627244	0.492986	0.318324	0.442772	0.643169	0.229721	0.392279	0.402369	0.603195	0.562766	0.591557	0.745916	0.463015	0.570242	0.670617	0.632272	0.410464	0.204159	0.395126	0.617411	0.403131	0.740474	0.900652	0.659557	0.878019	0.906105
TCGA-CN-4735-01A-01R-1436-07	7.42338	low-FANCE	0.58155	0.586451	0.533967	0.594365	0.792183	0.477627	0.42996	0.56113	0.484229	0.302928	0.501666	0.539527	0.209935	0.325814	0.475308	0.579953	0.618996	0.623917	0.683787	0.483158	0.579855	0.606702	0.616631	0.392411	0.253043	0.367657	0.578585	0.141393	0.675548	0.785264	0.546795	0.905093	0.753725
TCGA-F7-A620-01A-11R-A28V-07	7.4262	low-FANCE	0.671335	0.616241	0.577594	0.605333	0.777172	0.485734	0.485118	0.600603	0.461899	0.325837	0.436943	0.483756	0.282889	0.337214	0.37523	0.53129	0.611115	0.568259	0.670482	0.450196	0.53582	0.606056	0.609675	0.332869	0.257451	0.348307	0.595662	0.32852	0.600145	0.745657	0.565737	0.992165	0.985629
TCGA-MT-A51W-01A-21R-A266-07	7.43291	low-FANCE	0.558676	0.581501	0.486817	0.513242	0.735439	0.449936	0.441038	0.566664	0.410556	0.33189	0.465142	0.412675	0.121757	0.253987	0.372881	0.496088	0.603697	0.576255	0.540372	0.408119	0.520623	0.622399	0.608819	0.271384	0.247152	0.337639	0.606218	0.383345	0.44974	0.585104	0.389589	0.944369	0.963351
TCGA-BA-A6DL-01A-21R-A30B-07	7.46663	low-FANCE	0.517295	0.573651	0.442678	0.491414	0.72519	0.485723	0.423007	0.542913	0.376967	0.299952	0.397959	0.340746	0.157506	0.240865	0.335954	0.46785	0.594804	0.597322	0.46898	0.353403	0.500918	0.609982	0.635161	0.213201	0.143949	0.253775	0.574238	0.344976	0.318666	0.55439	0.326875	0.70304	0.921613
TCGA-HD-A6I0-01A-11R-A31N-07	7.49781	low-FANCE	0.629487	0.584963	0.536834	0.491558	0.737373	0.484486	0.43943	0.615492	0.421768	0.287391	0.425951	0.461058	0.155716	0.226731	0.36194	0.508598	0.593371	0.578597	0.635397	0.397943	0.515355	0.585247	0.591159	0.360602	0.263873	0.358898	0.636315	0.348074	0.582975	0.56836	0.467827	0.8961	0.841139
TCGA-CV-7091-01A-11R-2016-07	7.51548	low-FANCE	0.532336	0.603174	0.475181	0.505085	0.768263	0.458714	0.412605	0.555863	0.441974	0.315558	0.428289	0.449874	0.145554	0.214852	0.376867	0.517793	0.606842	0.63432	0.555754	0.416428	0.508512	0.603625	0.599293	0.299497	0.193084	0.350031	0.611835	0.322214	0.468255	0.603372	0.393166	0.886979	0.713921
TCGA-CN-5366-01A-01R-1436-07	7.53616	low-FANCE	0.587251	0.625641	0.508923	0.457658	0.771211	0.428648	0.475303	0.604924	0.442034	0.309356	0.429949	0.504737	0.149061	0.26332	0.398435	0.539257	0.578192	0.603421	0.616305	0.429509	0.477962	0.618594	0.602964	0.325999	0.150674	0.277	0.595619	0.290128	0.577004	0.675049	0.425536	0.887617	0.844749
TCGA-CV-6960-11A-01R-2016-07	7.56139	low-FANCE	0.471381	0.625296	0.45956	0.394775	0.732884	0.456905	0.448818	0.576461	0.386323	0.303789	0.399858	0.3844	0.091353	0.199763	0.405433	0.521703	0.568063	0.59668	0.520889	0.349518	0.492459	0.61622	0.64514	0.322573	0.213944	0.351507	0.602417	0.304103	0.502336	0.624873	0.320161	0.479661	0.481619
TCGA-CV-7250-01A-11R-2016-07	7.57389	low-FANCE	0.52157	0.586086	0.468404	0.512945	0.72935	0.404133	0.447498	0.565724	0.404993	0.338311	0.409543	0.42242	0.155586	0.244347	0.344363	0.529486	0.614588	0.575418	0.55467	0.384229	0.547708	0.595774	0.643813	0.251172	0.154396	0.255706	0.59473	0.26578	0.464467	0.662183	0.339378	0.751311	0.731288
TCGA-CR-6478-01A-11R-1873-07	7.63338	low-FANCE	0.682234	0.684624	0.589755	0.642401	0.803164	0.510382	0.518696	0.658168	0.510309	0.308964	0.454618	0.637746	0.335871	0.438237	0.419799	0.589669	0.609461	0.599067	0.783597	0.510419	0.566971	0.642007	0.644217	0.420153	0.216938	0.396407	0.657169	0.342031	0.779676	0.905998	0.690985	0.988573	0.929813
TCGA-QK-A6VC-01A-23R-A34R-07	7.67097	low-FANCE	0.660428	0.601406	0.568076	0.640463	0.791508	0.450233	0.44725	0.565586	0.469514	0.330759	0.429234	0.427441	0.245378	0.352559	0.407629	0.553892	0.596318	0.601465	0.668942	0.404397	0.556666	0.606155	0.646694	0.354455	0.242775	0.381545	0.585071	0.309278	0.561903	0.74828	0.554863	0.954715	0.892209
TCGA-4P-AA8J-01A-11R-A39I-07	7.68355	low-FANCE	0.592324	0.623097	0.51309	0.506142	0.800649	0.455829	0.450348	0.583212	0.454145	0.271743	0.404615	0.527113	0.219146	0.248686	0.395919	0.572699	0.592753	0.629261	0.651314	0.433628	0.536973	0.634568	0.594486	0.391948	0.170514	0.322038	0.604439	0.245982	0.619823	0.638501	0.488143	0.833539	0.81011
TCGA-UF-A7JT-01A-11R-A34R-07	7.72569	low-FANCE	0.738323	0.616371	0.627478	0.586448	0.816017	0.485079	0.515215	0.637368	0.494605	0.321667	0.447281	0.577046	0.231929	0.35559	0.356642	0.594366	0.600591	0.571724	0.743517	0.464984	0.541492	0.613896	0.622865	0.426381	0.202472	0.335442	0.606694	0.367952	0.746026	0.790152	0.611689	0.988496	0.970182
TCGA-QK-A64Z-01A-11R-A30B-07	7.7321	low-FANCE	0.513614	0.594958	0.458323	0.478809	0.757695	0.446134	0.395206	0.531608	0.410068	0.30848	0.452832	0.443423	0.0462904	0.200249	0.384576	0.52761	0.619798	0.610558	0.530901	0.392957	0.510432	0.595921	0.611885	0.300247	0.157486	0.26353	0.580469	0.197065	0.475878	0.537591	0.322028	0.914721	0.953928
TCGA-IQ-7632-01A-11R-2081-07	7.74988	low-FANCE	0.445883	0.562029	0.433899	0.515099	0.737284	0.432619	0.389293	0.540239	0.398361	0.297892	0.452477	0.336732	0.183079	0.229444	0.357664	0.498757	0.57948	0.624555	0.475583	0.36788	0.478024	0.61563	0.611116	0.287979	0.205321	0.254541	0.610862	0.377081	0.294046	0.510656	0.293536	0.757069	0.728685
TCGA-CV-5431-01A-01R-1514-07	7.77244	low-FANCE	0.664476	0.625987	0.530997	0.63198	0.799583	0.468626	0.477331	0.554711	0.521553	0.30744	0.474244	0.542995	0.372569	0.432252	0.431663	0.587279	0.583323	0.618538	0.728268	0.497505	0.575562	0.625252	0.59878	0.384073	0.301078	0.391827	0.619924	0.202834	0.656275	0.838838	0.621624	0.852751	0.633638
TCGA-HD-8635-01A-11R-2403-07	7.81954	low-FANCE	0.539472	0.632645	0.471708	0.458602	0.767753	0.453359	0.446091	0.601723	0.443087	0.292511	0.415747	0.508331	0.166553	0.255738	0.387208	0.554864	0.572443	0.616066	0.584106	0.425559	0.526963	0.636339	0.621494	0.29394	0.215221	0.350586	0.600925	0.34613	0.510386	0.657483	0.416118	0.800878	0.770359
TCGA-CV-A45V-01A-21R-A24Z-07	7.85524	low-FANCE	0.592648	0.626857	0.534392	0.518679	0.775916	0.478626	0.466217	0.616824	0.454921	0.295266	0.440334	0.460308	0.135977	0.271728	0.33826	0.556022	0.581595	0.589168	0.606251	0.387623	0.521726	0.616406	0.635387	0.340454	0.229773	0.416112	0.596162	0.397072	0.540957	0.663783	0.443	0.851529	0.847687
TCGA-CV-7434-01A-11R-2132-07	7.87904	low-FANCE	0.518405	0.597762	0.49654	0.547173	0.771398	0.467495	0.432	0.558796	0.418407	0.271878	0.467148	0.460201	0.0776244	0.241494	0.379473	0.51004	0.59085	0.56213	0.597238	0.449567	0.492186	0.584346	0.608913	0.317871	0.230188	0.276865	0.590427	0.30571	0.552232	0.597703	0.374823	0.957166	0.970021
TCGA-T2-A6WX-01A-12R-A34R-07	7.88555	low-FANCE	0.748104	0.595063	0.581624	0.593419	0.811619	0.4692	0.480721	0.591102	0.487617	0.328246	0.452661	0.55715	0.284533	0.375362	0.367627	0.572714	0.605968	0.592475	0.733719	0.461587	0.557687	0.596668	0.635521	0.35992	0.209625	0.298899	0.623671	0.290658	0.705715	0.79841	0.618556	0.994851	0.96927
TCGA-CN-5373-01A-01R-1436-07	7.91052	low-FANCE	0.557049	0.666233	0.575669	0.543011	0.795762	0.484546	0.528552	0.629671	0.479569	0.344785	0.466962	0.561289	0.220998	0.35995	0.404811	0.592213	0.564495	0.629959	0.67891	0.429785	0.551093	0.642827	0.617665	0.348436	0.255797	0.383684	0.612539	0.437632	0.668499	0.79938	0.550702	0.964898	0.987807
TCGA-BA-5556-01A-01R-1514-07	7.93392	low-FANCE	0.706384	0.610911	0.607258	0.608145	0.805582	0.46058	0.509561	0.605634	0.495507	0.347125	0.482147	0.522924	0.315772	0.400144	0.413272	0.590051	0.5858	0.592605	0.726004	0.451069	0.589027	0.606138	0.626535	0.350644	0.235335	0.35558	0.646445	0.354878	0.646512	0.809612	0.651164	0.991915	0.970397
TCGA-CN-4729-01A-01R-1436-07	7.94012	low-FANCE	0.456682	0.626389	0.457352	0.519497	0.772772	0.479496	0.455291	0.583337	0.432778	0.312817	0.43496	0.457908	0.164992	0.25567	0.413363	0.546803	0.587486	0.597747	0.551235	0.417242	0.506405	0.6669	0.610057	0.311539	0.275865	0.458596	0.597322	0.412453	0.463328	0.623147	0.400971	0.654502	0.570682
TCGA-CN-6010-01A-11R-1686-07	7.99014	low-FANCE	0.514081	0.609974	0.458811	0.503584	0.74578	0.465433	0.392096	0.533977	0.396958	0.262897	0.421362	0.396426	0.24385	0.271923	0.412243	0.519216	0.593466	0.576907	0.544038	0.402574	0.492283	0.624602	0.623005	0.316854	0.157704	0.302569	0.603609	0.152989	0.478413	0.643993	0.38492	0.627608	0.521492
TCGA-HD-A6HZ-01A-12R-A31N-07	8.00025	low-FANCE	0.582024	0.642046	0.555728	0.613066	0.798045	0.523813	0.491981	0.615896	0.488516	0.314939	0.453995	0.549303	0.255721	0.324447	0.382215	0.562699	0.577671	0.617694	0.690096	0.463642	0.595788	0.651999	0.620734	0.366153	0.220347	0.371093	0.59609	0.326847	0.656478	0.821262	0.580745	0.911694	0.692589
TCGA-CN-A6V7-01A-12R-A34R-07	8.03784	low-FANCE	0.529373	0.557196	0.450967	0.571463	0.694771	0.435574	0.347789	0.530553	0.393013	0.333317	0.472013	0.359097	0.0883312	0.242252	0.329644	0.486599	0.574115	0.561779	0.53855	0.374289	0.493693	0.59393	0.570876	0.295068	0.260533	0.252852	0.617316	0.0981866	0.473138	0.593018	0.339311	0.74233	0.764438
TCGA-UF-A7JF-01A-11R-A34R-07	8.08254	low-FANCE	0.555863	0.558221	0.487882	0.480657	0.744338	0.43758	0.438967	0.562606	0.388467	0.317064	0.390523	0.447645	0.137411	0.244559	0.360223	0.503917	0.587344	0.62425	0.59646	0.384195	0.557085	0.601	0.627461	0.362043	0.240733	0.292207	0.60027	0.305507	0.597132	0.586161	0.385091	0.597651	0.467378
TCGA-CN-4737-01A-01R-1436-07	8.10163	low-FANCE	0.422018	0.65201	0.432303	0.4009	0.781259	0.474347	0.483618	0.590091	0.426951	0.28815	0.434258	0.511517	0.115756	0.248811	0.348099	0.557117	0.576895	0.627143	0.563507	0.402402	0.476046	0.660621	0.595472	0.31341	0.221241	0.365505	0.595282	0.285405	0.538962	0.631762	0.335578	0.551367	0.70604
TCGA-CQ-6223-01A-11R-1915-07	8.10197	low-FANCE	0.536912	0.611361	0.489732	0.530558	0.753048	0.473083	0.44296	0.581721	0.418145	0.34977	0.448903	0.449164	0.176521	0.258632	0.359491	0.493459	0.584408	0.584711	0.585267	0.410579	0.55631	0.640075	0.636714	0.304884	0.272043	0.384984	0.586313	0.420538	0.527831	0.669771	0.407733	0.922121	0.895034
TCGA-CV-6948-01A-11R-1915-07	8.10759	low-FANCE	0.566377	0.59878	0.44943	0.570712	0.740699	0.416671	0.409434	0.568441	0.406854	0.232254	0.338617	0.410517	0.0986598	0.229171	0.451039	0.501226	0.600233	0.585462	0.568447	0.382824	0.499666	0.581212	0.623873	0.326738	0.139981	0.248974	0.58949	0.133107	0.542163	0.687447	0.41335	0.821473	0.491462
TCGA-CV-A45Y-01A-11R-A24Z-07	8.12515	low-FANCE	0.631502	0.619383	0.565405	0.560389	0.800955	0.469234	0.486443	0.625839	0.492095	0.316007	0.429346	0.554188	0.316004	0.349622	0.358002	0.561682	0.59497	0.648299	0.70104	0.455118	0.558288	0.659571	0.602582	0.398011	0.24439	0.320064	0.610914	0.326206	0.649665	0.749455	0.591212	0.88189	0.722899
TCGA-BB-A5HZ-01A-21R-A28V-07	8.14148	low-FANCE	0.48186	0.592777	0.423149	0.432218	0.759296	0.477595	0.41305	0.567648	0.389002	0.280088	0.402705	0.366203	0.119458	0.162995	0.31256	0.485421	0.560654	0.606349	0.49003	0.382724	0.516936	0.616089	0.593532	0.244993	0.246798	0.340394	0.579971	0.324263	0.351236	0.474389	0.266907	0.610082	0.926498
TCGA-CV-7438-01A-21R-2132-07	8.15864	low-FANCE	0.510575	0.637551	0.496948	0.545583	0.770631	0.473001	0.441869	0.559318	0.458065	0.291484	0.448584	0.502972	0.159618	0.293824	0.439258	0.60178	0.601295	0.653097	0.608927	0.443691	0.539339	0.621013	0.613767	0.340499	0.191602	0.255083	0.603419	0.29759	0.570743	0.648121	0.432491	0.945464	0.929116
TCGA-CR-7399-01A-11R-2016-07	8.16647	low-FANCE	0.69446	0.593708	0.533153	0.666443	0.775876	0.436675	0.467433	0.58892	0.498041	0.303147	0.44521	0.520789	0.218676	0.342359	0.449283	0.587482	0.602778	0.589066	0.728722	0.458208	0.555785	0.622684	0.618036	0.401333	0.212348	0.345219	0.623544	0.193002	0.700389	0.851081	0.627693	0.894262	0.635432
TCGA-TN-A7HI-01A-11R-A34R-07	8.20932	low-FANCE	0.681561	0.56301	0.518353	0.584865	0.732735	0.431085	0.487196	0.583492	0.431119	0.306749	0.401992	0.457794	0.37147	0.347831	0.398447	0.550356	0.595215	0.570664	0.660146	0.432966	0.517687	0.609586	0.560954	0.364936	0.243146	0.362463	0.613793	0.131835	0.595078	0.651239	0.560422	0.799716	0.686458
TCGA-CQ-7071-01A-12R-A30B-07	8.2246	low-FANCE	0.577508	0.617601	0.549373	0.554278	0.787204	0.487896	0.474996	0.600465	0.44569	0.306371	0.493713	0.495845	0.156368	0.307205	0.390201	0.540676	0.581644	0.560039	0.614459	0.421965	0.505996	0.61434	0.634076	0.313994	0.25729	0.339269	0.596282	0.418443	0.606675	0.722383	0.460989	0.940241	0.862499
TCGA-HD-7229-01A-11R-2016-07	8.22848	low-FANCE	0.576868	0.567503	0.512193	0.530169	0.770654	0.435375	0.437326	0.593325	0.410563	0.314481	0.434419	0.464032	0.216686	0.30385	0.398806	0.514347	0.615777	0.572224	0.615372	0.430611	0.513935	0.611105	0.606229	0.293362	0.198638	0.345718	0.603852	0.325721	0.500244	0.689743	0.429276	0.959352	0.964861
TCGA-CR-6477-01A-11R-1873-07	8.29638	low-FANCE	0.51404	0.652884	0.516173	0.496782	0.808691	0.469423	0.509357	0.651114	0.460439	0.325495	0.441895	0.620027	0.199889	0.326988	0.403272	0.574445	0.590022	0.626387	0.698466	0.461716	0.585169	0.625117	0.59848	0.373055	0.188953	0.372475	0.63586	0.285331	0.688544	0.767947	0.534503	0.727074	0.8475
TCGA-CV-A463-01A-11R-A266-07	8.40482	low-FANCE	0.530671	0.568755	0.464345	0.527335	0.736234	0.459643	0.411952	0.554271	0.412737	0.311223	0.433275	0.35347	0.131394	0.244941	0.384174	0.489121	0.568422	0.566229	0.522255	0.385731	0.489085	0.594614	0.586403	0.260211	0.215715	0.245743	0.586632	0.37403	0.374227	0.530779	0.326752	0.858316	0.860009
TCGA-CV-7101-11A-01R-2016-07	8.43816	low-FANCE	0.441979	0.546976	0.422244	0.387594	0.701705	0.438445	0.402695	0.508087	0.347527	0.294974	0.401712	0.312064	0.0909928	0.171373	0.393846	0.50287	0.568692	0.593054	0.437325	0.318086	0.431615	0.621065	0.659646	0.268061	0.249934	0.254875	0.616301	0.286517	0.27339	0.609395	0.238885	0.461587	0.494909
TCGA-D6-6517-01A-11R-1873-07	8.44148	low-FANCE	0.482245	0.631636	0.472327	0.491271	0.796695	0.449425	0.436301	0.593278	0.429467	0.311167	0.436557	0.518282	0.257158	0.325894	0.413996	0.545519	0.616637	0.627151	0.612514	0.440834	0.527404	0.613628	0.619548	0.33161	0.158955	0.281748	0.616014	0.312279	0.56965	0.690715	0.453778	0.680089	0.727488
TCGA-CV-6441-01A-11R-1686-07	8.50884	low-FANCE	0.468384	0.567769	0.397097	0.500653	0.717802	0.406885	0.363534	0.49447	0.362864	0.284221	0.437652	0.27004	0.00773357	0.195224	0.379143	0.497866	0.606544	0.628623	0.46436	0.379807	0.50472	0.555779	0.599394	0.25524	0.120354	0.201245	0.609925	0.135128	0.407246	0.557656	0.248271	0.705439	0.830662
TCGA-H7-7774-01A-21R-2081-07	8.51435	low-FANCE	0.575115	0.611887	0.518863	0.525336	0.752599	0.449628	0.492946	0.605465	0.41915	0.293116	0.463453	0.414836	0.189597	0.302413	0.390824	0.472049	0.550277	0.60909	0.582808	0.385155	0.539671	0.612896	0.595889	0.317945	0.226931	0.350214	0.607382	0.406319	0.546093	0.702829	0.460921	0.900966	0.948656
TCGA-CV-A464-01A-11R-A266-07	8.52759	low-FANCE	0.569041	0.627701	0.486343	0.5019	0.783855	0.501475	0.446187	0.575181	0.45237	0.285767	0.459366	0.443587	0.164428	0.254164	0.439798	0.553871	0.600856	0.593411	0.568925	0.41261	0.484641	0.625691	0.585277	0.334564	0.23247	0.349363	0.609452	0.284742	0.503454	0.589723	0.423692	0.940719	0.959593
TCGA-RS-A6TO-01A-32R-A34R-07	8.5365	low-FANCE	0.589048	0.623234	0.496136	0.517952	0.771977	0.469146	0.493236	0.605592	0.446167	0.294326	0.390589	0.519179	0.0754052	0.278801	0.394521	0.548994	0.569808	0.607761	0.642631	0.426146	0.550387	0.632879	0.615414	0.395733	0.209118	0.270706	0.586317	0.207379	0.613554	0.651663	0.421234	0.943687	0.91694
TCGA-CQ-7063-01A-11R-2403-07	8.5413	low-FANCE	0.653291	0.591642	0.590347	0.559668	0.804229	0.44857	0.535619	0.610758	0.476975	0.338771	0.492991	0.537543	0.253897	0.376733	0.412556	0.583448	0.611939	0.603999	0.697567	0.435234	0.535748	0.632563	0.62471	0.346656	0.302794	0.416659	0.628918	0.374767	0.6762	0.816982	0.577955	0.986741	0.957589
TCGA-CV-5966-01A-11R-1686-07	8.56223	low-FANCE	0.599013	0.612584	0.534482	0.591444	0.767036	0.499777	0.475658	0.613589	0.458805	0.283874	0.464129	0.522546	0.148228	0.277129	0.382027	0.56932	0.639315	0.569788	0.662653	0.451652	0.533911	0.604611	0.626786	0.39612	0.248361	0.30326	0.615302	0.170444	0.708576	0.712249	0.527833	0.957451	0.954899
TCGA-CN-4738-01A-02R-1514-07	8.58847	low-FANCE	0.574077	0.623294	0.539778	0.528413	0.781141	0.442288	0.460435	0.565043	0.447334	0.311698	0.427311	0.505313	0.206939	0.324301	0.388704	0.562526	0.605521	0.597498	0.665191	0.404984	0.556131	0.653333	0.660785	0.34106	0.280174	0.38118	0.624231	0.304758	0.608503	0.772491	0.516167	0.875983	0.773196
TCGA-QK-A6II-01A-11R-A31N-07	8.62686	low-FANCE	0.587719	0.568531	0.519389	0.464299	0.730389	0.405012	0.438	0.537559	0.40728	0.321096	0.409322	0.439609	0.121357	0.220381	0.35794	0.503249	0.597933	0.585515	0.565853	0.412162	0.53923	0.619415	0.599364	0.332401	0.218737	0.363264	0.636755	0.422532	0.477957	0.554702	0.365718	0.856926	0.720172
TCGA-D6-A74Q-01A-11R-A34R-07	8.63009	low-FANCE	0.621865	0.566497	0.462369	0.525198	0.757177	0.467056	0.405363	0.544136	0.422809	0.367501	0.421483	0.344047	0.23238	0.271157	0.357873	0.51443	0.607836	0.637034	0.552997	0.3905	0.512733	0.608366	0.620682	0.277303	0.247043	0.363781	0.602928	0.259035	0.435008	0.564835	0.424931	0.728916	0.872516
TCGA-CR-7372-01A-11R-2016-07	8.66654	low-FANCE	0.477832	0.628724	0.451342	0.438888	0.782379	0.487369	0.450037	0.59565	0.415833	0.297443	0.453838	0.409694	0.160374	0.231347	0.388606	0.533169	0.58923	0.590412	0.535282	0.405341	0.502132	0.635151	0.599259	0.306899	0.24924	0.453841	0.600946	0.335709	0.459878	0.611052	0.35618	0.648073	0.808332
TCGA-CV-6961-01A-21R-1915-07	8.67005	low-FANCE	0.459388	0.678266	0.483787	0.541279	0.751763	0.493747	0.458147	0.581773	0.46126	0.281957	0.52741	0.457942	0.0418034	0.200974	0.379441	0.602089	0.581059	0.590512	0.58822	0.446231	0.547324	0.638292	0.59608	0.310832	0.237287	0.404161	0.58731	0.344531	0.538902	0.658954	0.336261	0.840614	0.635496
TCGA-CV-7411-01A-11R-2081-07	8.67594	low-FANCE	0.504114	0.611273	0.482228	0.475912	0.774206	0.47604	0.463023	0.592434	0.437311	0.323338	0.428147	0.431756	0.150167	0.242809	0.342053	0.535715	0.576972	0.60048	0.547335	0.395698	0.51429	0.621875	0.607275	0.297712	0.238674	0.288378	0.632	0.413025	0.45496	0.586155	0.38027	0.731654	0.724032
TCGA-CV-A6JY-01A-11R-A31N-07	8.78324	low-FANCE	0.458575	0.572825	0.427133	0.424922	0.738294	0.468154	0.431012	0.573778	0.373241	0.28918	0.419095	0.328966	0.141191	0.172209	0.35196	0.44921	0.569395	0.586806	0.479581	0.336524	0.463186	0.612095	0.617953	0.267605	0.217452	0.360788	0.588908	0.378625	0.355902	0.499523	0.263058	0.527669	0.624784
TCGA-CV-7410-01A-21R-2081-07	8.82236	low-FANCE	0.704005	0.596911	0.5828	0.625233	0.814551	0.535776	0.515764	0.615005	0.520179	0.318272	0.472004	0.593563	0.635647	0.633722	0.485867	0.572268	0.564767	0.626116	0.748478	0.457743	0.572476	0.640388	0.629818	0.372452	0.260556	0.335123	0.66018	0.307103	0.691226	0.898279	0.767485	0.920849	0.771399
TCGA-CQ-6229-01A-11R-1915-07	8.84583	low-FANCE	0.579791	0.612575	0.514019	0.511315	0.778698	0.479455	0.473289	0.598114	0.412615	0.307036	0.445906	0.428746	0.166073	0.273153	0.366414	0.552836	0.587913	0.594082	0.568123	0.415174	0.522475	0.633797	0.606963	0.298814	0.183761	0.298697	0.57936	0.44021	0.526183	0.63034	0.414621	0.944271	0.943965
TCGA-P3-A5Q6-01A-11R-A28V-07	8.86623	low-FANCE	0.4537	0.633437	0.421006	0.480388	0.764533	0.466284	0.436062	0.602745	0.416238	0.302933	0.410829	0.432813	0.073872	0.211773	0.399181	0.500771	0.602667	0.625243	0.561598	0.411105	0.47404	0.611154	0.595987	0.347838	0.176349	0.297577	0.601078	0.185158	0.54376	0.541249	0.328258	0.664842	0.584079
TCGA-CV-5979-01A-11R-1686-07	8.88716	low-FANCE	0.450846	0.570756	0.433049	0.499374	0.773509	0.460385	0.42272	0.583038	0.370569	0.230423	0.476117	0.447539	0.102192	0.224868	0.389549	0.543051	0.593155	0.634858	0.513101	0.437809	0.496986	0.595568	0.600591	0.304831	0.162502	0.275511	0.600819	0.221328	0.464703	0.540344	0.323978	0.824019	0.929175
TCGA-CN-A63W-01A-11R-A30B-07	8.9167	low-FANCE	0.543384	0.591112	0.465871	0.458986	0.759239	0.447187	0.429378	0.56249	0.385091	0.311904	0.421772	0.346535	0.0974808	0.156637	0.372768	0.482643	0.584247	0.592112	0.487149	0.420337	0.500903	0.597086	0.601735	0.243727	0.136873	0.287276	0.593736	0.326431	0.362215	0.509072	0.277097	0.870047	0.929573
TCGA-CQ-7065-01A-11R-2081-07	8.9238	low-FANCE	0.380285	0.588363	0.381832	0.3426	0.744959	0.43755	0.380144	0.555204	0.330415	0.285618	0.428586	0.394348	0.0361666	0.176203	0.383236	0.464552	0.602289	0.580804	0.390224	0.365338	0.425779	0.617832	0.592188	0.245832	0.160788	0.303641	0.585199	0.318575	0.24068	0.428806	0.149939	0.602419	0.914559
TCGA-CN-6019-01A-11R-1686-07	8.92398	low-FANCE	0.59716	0.695475	0.53653	0.450707	0.814187	0.491273	0.552146	0.619958	0.499755	0.294407	0.3944	0.64737	0.186394	0.311645	0.395601	0.618381	0.586147	0.613981	0.747135	0.464217	0.555123	0.664197	0.656385	0.453292	0.271222	0.532039	0.626718	0.19794	0.777081	0.823093	0.562047	0.700324	0.58117
TCGA-CV-7414-01A-11R-2081-07	8.94531	low-FANCE	0.544423	0.631706	0.452036	0.420351	0.746661	0.413987	0.392077	0.536707	0.426741	0.281532	0.43863	0.301925	0.0354443	0.188935	0.362664	0.52358	0.611908	0.557615	0.497304	0.388095	0.504706	0.580707	0.615434	0.287977	0.133488	0.299594	0.596636	0.16741	0.38084	0.564306	0.327865	0.712383	0.791754
TCGA-CQ-5324-01A-01R-1686-07	8.95266	low-FANCE	0.552051	0.623416	0.512392	0.519838	0.777727	0.466511	0.440038	0.564971	0.433178	0.309526	0.465583	0.44831	0.168589	0.249048	0.371211	0.558649	0.582288	0.597523	0.591781	0.416819	0.534014	0.610663	0.620519	0.339565	0.23995	0.318207	0.616506	0.272974	0.53892	0.647362	0.409771	0.928795	0.876768
TCGA-CR-7395-01A-11R-2016-07	8.95592	low-FANCE	0.672333	0.628959	0.576851	0.578493	0.820188	0.483688	0.515044	0.628401	0.498553	0.334425	0.501013	0.581025	0.303077	0.395456	0.415724	0.582458	0.593071	0.574815	0.716541	0.43044	0.550483	0.62997	0.61871	0.372761	0.305158	0.417327	0.64097	0.384694	0.666179	0.850643	0.638183	0.972092	0.867076
TCGA-TN-A7HJ-01A-12R-A34R-07	8.99512	low-FANCE	0.472652	0.565457	0.417498	0.482307	0.730828	0.446709	0.407486	0.551075	0.395785	0.324288	0.431712	0.333907	0.211181	0.225425	0.379779	0.49946	0.580649	0.601299	0.517599	0.38588	0.491315	0.627041	0.619309	0.278534	0.18403	0.27471	0.592802	0.316679	0.427284	0.570592	0.340473	0.665867	0.809664
TCGA-CN-6018-01A-11R-1686-07	9.01031	low-FANCE	0.588035	0.693961	0.498246	0.60506	0.787169	0.514281	0.477186	0.617742	0.486691	0.273477	0.479754	0.606714	0.195603	0.3419	0.438427	0.577631	0.597864	0.613517	0.691688	0.506688	0.553736	0.621562	0.622688	0.394184	0.274879	0.364146	0.613019	0.300126	0.68026	0.772002	0.520779	0.946956	0.928726
TCGA-CN-6996-01A-11R-1915-07	9.01864	low-FANCE	0.615603	0.64936	0.590459	0.592159	0.795761	0.516456	0.528253	0.639873	0.481177	0.326136	0.476138	0.61063	0.252846	0.385528	0.397814	0.601106	0.616987	0.563636	0.723454	0.463629	0.54544	0.637569	0.627879	0.37606	0.246852	0.459127	0.609427	0.33556	0.724782	0.854082	0.614218	0.988226	0.985242
TCGA-BB-A5HU-01A-11R-A28V-07	9.04931	low-FANCE	0.453201	0.635584	0.48741	0.531747	0.790586	0.452283	0.428242	0.578956	0.42497	0.300221	0.411435	0.471997	0.099869	0.239046	0.416777	0.533496	0.587915	0.590221	0.566076	0.446598	0.571217	0.641608	0.606461	0.325834	0.213653	0.281866	0.604007	0.332347	0.499705	0.598784	0.379454	0.695548	0.528905
TCGA-CN-4742-01A-02R-1514-07	9.09501	high-FANCE	0.488699	0.638238	0.482947	0.47998	0.77744	0.495443	0.489529	0.590716	0.42788	0.313316	0.426947	0.511942	0.194837	0.294341	0.426797	0.576366	0.586199	0.600135	0.604375	0.414105	0.513174	0.668487	0.607399	0.333633	0.196252	0.318463	0.613291	0.440317	0.570025	0.658246	0.434636	0.769766	0.885037
TCGA-CV-7177-01A-11R-2016-07	9.11183	high-FANCE	0.426427	0.661647	0.453035	0.421978	0.783592	0.467187	0.458215	0.575568	0.415157	0.292159	0.418511	0.444784	0.0727231	0.228578	0.434398	0.524097	0.568052	0.593013	0.535647	0.405684	0.491478	0.615372	0.606977	0.346269	0.219608	0.342259	0.611829	0.245599	0.543056	0.6192	0.306485	0.495828	0.506421
TCGA-CV-7095-01A-21R-2016-07	9.12615	high-FANCE	0.480571	0.610059	0.470883	0.473745	0.776206	0.444483	0.427644	0.56449	0.391735	0.319911	0.441246	0.453165	0.108655	0.267362	0.405577	0.526767	0.593716	0.589572	0.562294	0.431073	0.521089	0.591313	0.606133	0.247305	0.176055	0.247482	0.598412	0.286248	0.49296	0.56864	0.345713	0.841265	0.855789
TCGA-CN-5370-01A-01R-2016-07	9.15091	high-FANCE	0.587593	0.682978	0.568368	0.595317	0.796341	0.530057	0.532164	0.636173	0.505549	0.310033	0.452852	0.655282	0.1888	0.355964	0.411692	0.61521	0.625743	0.59892	0.743192	0.488895	0.558251	0.644169	0.653698	0.428587	0.288721	0.440394	0.609819	0.329361	0.791517	0.876805	0.597696	0.957479	0.970034
TCGA-CV-A6K2-01A-11R-A31N-07	9.1575	high-FANCE	0.555435	0.621225	0.49021	0.549867	0.765213	0.446411	0.469719	0.566466	0.433512	0.315125	0.453586	0.455193	0.11618	0.25808	0.444022	0.556271	0.58143	0.611188	0.590731	0.40921	0.500252	0.612816	0.638528	0.355612	0.177614	0.300977	0.621837	0.400808	0.56143	0.62927	0.423346	0.872084	0.875199
TCGA-P3-A6T7-01A-11R-A34R-07	9.16222	high-FANCE	0.532392	0.609034	0.485543	0.53697	0.75252	0.437136	0.462773	0.572307	0.407826	0.37428	0.423329	0.385896	0.0638581	0.208813	0.355413	0.527004	0.568985	0.59022	0.537206	0.389462	0.527176	0.626815	0.575822	0.31132	0.264172	0.247647	0.583002	0.387727	0.456008	0.53531	0.328245	0.922869	0.928398
TCGA-CV-A6K1-01A-11R-A31N-07	9.19425	high-FANCE	0.604696	0.568467	0.500042	0.451785	0.749822	0.440474	0.420233	0.581342	0.393157	0.302098	0.423377	0.403006	0.129534	0.215753	0.343296	0.511471	0.601077	0.573013	0.596339	0.404999	0.493099	0.602517	0.61129	0.347867	0.197942	0.316402	0.606135	0.370734	0.540203	0.537364	0.382275	0.792026	0.888118
TCGA-CR-7383-01A-11R-2132-07	9.23011	high-FANCE	0.593709	0.64503	0.54923	0.567643	0.800252	0.531329	0.479442	0.598674	0.488751	0.279317	0.443896	0.583792	0.259114	0.332546	0.409784	0.590901	0.601183	0.644889	0.661143	0.468811	0.53196	0.59903	0.621098	0.401612	0.199091	0.391448	0.612413	0.217658	0.708311	0.76411	0.557684	0.864262	0.869474
TCGA-D6-8568-01A-11R-2403-07	9.25357	high-FANCE	0.483839	0.65457	0.470104	0.60212	0.780355	0.518938	0.467736	0.594698	0.451754	0.321248	0.4566	0.528571	0.173193	0.252025	0.410243	0.566074	0.591461	0.61011	0.598197	0.453761	0.529766	0.663226	0.631328	0.349028	0.32971	0.472061	0.609006	0.414898	0.577127	0.719322	0.428618	0.864934	0.77182
TCGA-CN-6994-01A-11R-1915-07	9.31767	high-FANCE	0.477919	0.640164	0.46212	0.46461	0.769994	0.463905	0.439384	0.611624	0.422767	0.31107	0.431022	0.477499	0.0807214	0.212853	0.406788	0.549513	0.59282	0.594159	0.591038	0.390282	0.532201	0.634779	0.601411	0.349069	0.196552	0.269126	0.604585	0.243409	0.542546	0.656221	0.352044	0.702201	0.725763
TCGA-CR-6482-01A-11R-1873-07	9.3316	high-FANCE	0.672689	0.643379	0.580488	0.643599	0.808255	0.469776	0.478832	0.586149	0.497739	0.286562	0.481567	0.57594	0.522039	0.521366	0.456108	0.622216	0.60676	0.568521	0.747944	0.458403	0.55357	0.640125	0.630791	0.356715	0.251377	0.350599	0.676593	0.175967	0.745758	0.905627	0.734828	0.903398	0.773275
TCGA-CV-7242-01A-11R-2016-07	9.36244	high-FANCE	0.636793	0.585469	0.533166	0.534138	0.766793	0.420277	0.444468	0.513559	0.423796	0.284112	0.385405	0.391005	0.316006	0.312525	0.379986	0.534886	0.599538	0.571819	0.608596	0.378856	0.566521	0.644359	0.636557	0.280005	0.189499	0.313092	0.61037	0.270169	0.516971	0.747553	0.550993	0.81908	0.72868
TCGA-CN-5355-01A-01R-1436-07	9.37159	high-FANCE	0.468944	0.634551	0.476801	0.50706	0.785248	0.508005	0.461038	0.570517	0.43879	0.304057	0.454612	0.428845	0.204336	0.236051	0.400922	0.543113	0.572317	0.575091	0.569816	0.395901	0.489346	0.658098	0.614783	0.296737	0.249458	0.423939	0.600293	0.347756	0.469771	0.609713	0.365282	0.595148	0.398156
TCGA-DQ-5625-01A-01R-1873-07	9.39247	high-FANCE	0.683186	0.595543	0.59044	0.518955	0.809685	0.4784	0.493797	0.586532	0.484467	0.352149	0.483146	0.523403	0.188541	0.346914	0.394647	0.596633	0.596724	0.577999	0.670101	0.45721	0.570215	0.603363	0.612678	0.34766	0.23791	0.320621	0.644882	0.327277	0.667862	0.799301	0.568797	0.991664	0.91828
TCGA-P3-A6T2-01A-11R-A34R-07	9.40945	high-FANCE	0.472421	0.582932	0.458442	0.560528	0.767574	0.480421	0.391178	0.571085	0.407842	0.268555	0.495756	0.460936	0.0904436	0.175584	0.397156	0.520754	0.590865	0.533561	0.537918	0.42707	0.475916	0.585608	0.599502	0.294279	0.218633	0.279813	0.591524	0.284933	0.447114	0.506223	0.317517	0.868322	0.830458
TCGA-D6-8569-01A-11R-2403-07	9.41168	high-FANCE	0.494302	0.596609	0.482827	0.526194	0.765579	0.47967	0.424466	0.562398	0.433369	0.327406	0.459206	0.469483	0.167512	0.272461	0.398991	0.557087	0.599196	0.595737	0.547285	0.422577	0.548301	0.62575	0.604519	0.303855	0.173665	0.281517	0.589135	0.325364	0.507498	0.652441	0.408931	0.915089	0.947728
TCGA-CV-A45R-01A-11R-A24H-07	9.42075	high-FANCE	0.532206	0.635663	0.476203	0.455656	0.796119	0.441783	0.483138	0.578513	0.44144	0.344072	0.421168	0.490871	0.127411	0.246574	0.384738	0.584418	0.576785	0.626636	0.598477	0.415863	0.490302	0.625722	0.629703	0.37774	0.187086	0.37526	0.612231	0.319751	0.588471	0.683659	0.415483	0.925754	0.943842
TCGA-CV-6952-01A-11R-1915-07	9.47298	high-FANCE	0.55974	0.597259	0.524532	0.545763	0.772216	0.46621	0.481188	0.601097	0.446857	0.310081	0.465645	0.473206	0.193357	0.299107	0.366506	0.530387	0.600932	0.573309	0.605668	0.435345	0.538394	0.613413	0.605898	0.314145	0.260145	0.365725	0.571355	0.446063	0.534145	0.655645	0.448966	0.969518	0.973898
TCGA-WA-A7H4-01A-21R-A34R-07	9.61347	high-FANCE	0.498398	0.598957	0.452322	0.433799	0.772489	0.508785	0.396421	0.553174	0.416786	0.268819	0.423028	0.416463	0.127011	0.217122	0.395675	0.567444	0.606406	0.596118	0.549681	0.405275	0.501541	0.649502	0.615913	0.293682	0.118455	0.289928	0.5903	0.200551	0.481611	0.60865	0.391877	0.655922	0.589258
TCGA-CQ-A4CG-01A-11R-A266-07	9.61821	high-FANCE	0.444184	0.592316	0.43174	0.52655	0.74085	0.471639	0.364242	0.514767	0.383995	0.258777	0.476964	0.405058	0.103564	0.165861	0.402892	0.529671	0.598309	0.598565	0.500746	0.429837	0.522646	0.630314	0.622096	0.303015	0.225264	0.298577	0.574168	0.166439	0.440163	0.506432	0.258664	0.867679	0.896309
TCGA-D6-A6EP-01A-11R-A31N-07	9.63515	high-FANCE	0.504887	0.543938	0.431134	0.307697	0.673261	0.378642	0.386302	0.552871	0.389648	0.23264	0.34973	0.350629	0.131199	0.161647	0.36148	0.523483	0.551911	0.596183	0.547791	0.364138	0.420384	0.574568	0.535309	0.348784	0.167424	0.281347	0.625397	0.122078	0.458476	0.427094	0.3021	0.493768	0.589218
TCGA-BA-6872-01A-11R-1873-07	9.68122	high-FANCE	0.490856	0.634198	0.469511	0.532919	0.776256	0.461216	0.449859	0.624826	0.416541	0.33559	0.41956	0.461525	0.114609	0.240785	0.366231	0.535947	0.626204	0.634391	0.576571	0.411152	0.498658	0.603352	0.600682	0.318271	0.179264	0.382825	0.600437	0.35609	0.494019	0.58115	0.383594	0.786566	0.893765
TCGA-UF-A7JC-01A-21R-A34R-07	9.76231	high-FANCE	0.398465	0.537106	0.425484	0.497846	0.750912	0.443162	0.418091	0.568306	0.365741	0.296457	0.448354	0.358069	0.0672519	0.141776	0.355211	0.472415	0.575241	0.59249	0.42917	0.37469	0.463725	0.614303	0.582242	0.201872	0.215152	0.308005	0.58167	0.39938	0.299427	0.434533	0.221486	0.767044	0.857182
TCGA-CR-6493-01A-11R-1873-07	9.8021	high-FANCE	0.434857	0.571986	0.468274	0.501419	0.761947	0.469148	0.401542	0.565536	0.37855	0.251554	0.4519	0.435162	0.128018	0.209356	0.406679	0.522687	0.59664	0.55873	0.510159	0.413529	0.48076	0.57108	0.60028	0.262816	0.142898	0.269846	0.600498	0.301841	0.415781	0.524198	0.278338	0.879904	0.9013
TCGA-CV-7418-01A-11R-2081-07	9.83774	high-FANCE	0.568221	0.586869	0.472268	0.613127	0.728382	0.500658	0.407796	0.548137	0.432827	0.292077	0.470145	0.390595	0.155146	0.213534	0.411201	0.526734	0.603208	0.578535	0.57618	0.385422	0.506812	0.62908	0.619408	0.34408	0.247205	0.393446	0.605658	0.121218	0.514401	0.701553	0.383744	0.806566	0.781889
TCGA-CV-6951-01A-11R-1915-07	9.84489	high-FANCE	0.459677	0.58477	0.413573	0.368655	0.748934	0.416042	0.376978	0.560725	0.387071	0.264582	0.384521	0.334843	0.101972	0.173238	0.317869	0.51075	0.578752	0.578558	0.456401	0.389575	0.482318	0.601526	0.607118	0.26876	0.178267	0.286457	0.591134	0.257655	0.380143	0.483012	0.236257	0.595949	0.810536
TCGA-CV-7247-01A-11R-2016-07	9.91217	high-FANCE	0.404061	0.618447	0.393347	0.515785	0.734636	0.478361	0.379229	0.544026	0.42256	0.277845	0.476097	0.348619	0.053778	0.157978	0.408305	0.53202	0.597296	0.583992	0.475198	0.444715	0.460606	0.599712	0.602047	0.264755	0.118997	0.257138	0.585056	0.207164	0.335351	0.476335	0.249479	0.611227	0.582537
TCGA-CN-5361-01A-01R-1436-07	9.9358	high-FANCE	0.529588	0.642029	0.504551	0.462967	0.777263	0.457919	0.446405	0.592557	0.443254	0.317616	0.426098	0.446069	0.102753	0.258857	0.453062	0.580671	0.590161	0.623641	0.601567	0.425763	0.508706	0.610042	0.614218	0.35545	0.125802	0.275095	0.62235	0.108123	0.537698	0.650842	0.368715	0.899174	0.866957
TCGA-CN-A6V3-01A-12R-A34R-07	9.95001	high-FANCE	0.573321	0.56983	0.507524	0.560308	0.779128	0.441427	0.419925	0.580884	0.421947	0.312073	0.422284	0.456651	0.221201	0.30034	0.391193	0.492557	0.598261	0.595513	0.595741	0.440122	0.583262	0.592657	0.615727	0.280111	0.193808	0.273929	0.585027	0.309248	0.485137	0.671052	0.431004	0.970478	0.944028
TCGA-BB-4217-01A-11R-2081-07	9.98596	high-FANCE	0.686569	0.605547	0.548377	0.63686	0.814876	0.515181	0.473398	0.582116	0.497022	0.304456	0.435757	0.454002	0.619686	0.570691	0.465712	0.564801	0.584809	0.595047	0.690069	0.43468	0.551053	0.635514	0.615042	0.324254	0.296594	0.321548	0.641083	0.233406	0.560591	0.860664	0.74627	0.650461	0.654486
TCGA-CV-6936-01A-11R-1915-07	9.99355	high-FANCE	0.579308	0.584137	0.543	0.554746	0.758618	0.4733	0.416054	0.61302	0.422794	0.312541	0.456115	0.420173	0.162566	0.24443	0.395735	0.547691	0.594799	0.607095	0.58708	0.402793	0.554806	0.577891	0.599636	0.313424	0.164202	0.333492	0.592965	0.309615	0.490702	0.670446	0.380124	0.886776	0.798951
TCGA-CR-6472-01A-11R-1873-07	9.99757	high-FANCE	0.554938	0.577164	0.395813	0.522049	0.745625	0.432665	0.396331	0.537354	0.406767	0.297482	0.438858	0.293948	0.195681	0.243091	0.349367	0.520345	0.58582	0.55328	0.495069	0.338721	0.446765	0.561476	0.610053	0.255693	0.198889	0.326632	0.628883	0.121609	0.336837	0.641941	0.381748	0.61582	0.57087
TCGA-BA-A6DA-01A-31R-A31N-07	10.0015	high-FANCE	0.558711	0.56787	0.489171	0.485681	0.745107	0.442861	0.445645	0.578533	0.413935	0.333539	0.38616	0.469589	0.132909	0.2275	0.34243	0.48911	0.59359	0.617932	0.578279	0.40085	0.530989	0.64028	0.597809	0.331835	0.237712	0.358893	0.59751	0.453023	0.52132	0.557201	0.404513	0.80493	0.676139
TCGA-CV-7421-01A-11R-2081-07	10.015	high-FANCE	0.46198	0.613403	0.444689	0.446881	0.773912	0.457237	0.40515	0.535368	0.416708	0.291384	0.475558	0.404701	0.122426	0.184484	0.375632	0.549046	0.607481	0.618043	0.542227	0.402195	0.458395	0.637713	0.587639	0.343028	0.181186	0.3557	0.589507	0.191916	0.524013	0.523157	0.283113	0.621134	0.803882
TCGA-UF-A71B-01A-12R-A34R-07	10.0789	high-FANCE	0.50498	0.617727	0.479555	0.537849	0.764755	0.477604	0.440451	0.587507	0.437214	0.288341	0.48597	0.449678	0.208602	0.238185	0.350023	0.513317	0.571749	0.576266	0.606451	0.422853	0.526659	0.627216	0.631647	0.326798	0.188575	0.324281	0.584492	0.351042	0.573478	0.641163	0.416231	0.688337	0.83474
TCGA-CV-6940-01A-11R-1915-07	10.1169	high-FANCE	0.499055	0.613053	0.461859	0.458404	0.727662	0.471627	0.422689	0.548943	0.398233	0.286834	0.430163	0.431447	0.0969108	0.192694	0.400762	0.50585	0.591343	0.582085	0.514827	0.415184	0.51849	0.609911	0.614466	0.298185	0.183106	0.267224	0.580697	0.248791	0.479129	0.552688	0.326402	0.513481	0.456096
TCGA-H7-8501-01A-11R-2403-07	10.1245	high-FANCE	0.766339	0.613301	0.60087	0.700434	0.812148	0.483447	0.516546	0.636266	0.517561	0.317	0.494539	0.600759	0.235056	0.383785	0.405377	0.590232	0.608332	0.536079	0.737476	0.508874	0.58281	0.603945	0.649491	0.411312	0.278055	0.376312	0.616908	0.285968	0.751834	0.867743	0.664733	0.999387	0.955676
TCGA-CR-7364-01A-11R-2016-07	10.1402	high-FANCE	0.470125	0.619756	0.456041	0.513206	0.769411	0.472916	0.476123	0.55969	0.433635	0.323636	0.459096	0.415601	0.169599	0.269779	0.409821	0.534532	0.602303	0.583354	0.512088	0.394523	0.517966	0.645089	0.63931	0.331909	0.30127	0.409347	0.613608	0.32502	0.437259	0.699845	0.419838	0.66887	0.630277
TCGA-HD-A4C1-01A-11R-A24H-07	10.1741	high-FANCE	0.464031	0.593353	0.50374	0.526043	0.745166	0.466803	0.437269	0.557663	0.411094	0.312079	0.474063	0.38946	0.127786	0.212336	0.381501	0.527322	0.571365	0.554955	0.506993	0.376848	0.457975	0.643904	0.622808	0.279372	0.240143	0.288642	0.601161	0.373962	0.41694	0.576946	0.306617	0.902588	0.735859
TCGA-CN-6023-01A-11R-1686-07	10.2591	high-FANCE	0.662733	0.61318	0.519493	0.633177	0.75435	0.448981	0.45736	0.55155	0.443679	0.234805	0.398326	0.44576	0.267336	0.374261	0.444587	0.555383	0.587589	0.612379	0.660308	0.443858	0.543965	0.595467	0.670594	0.369179	0.214104	0.319772	0.627905	0.0892356	0.669129	0.803099	0.57918	0.813591	0.872343
TCGA-CN-A642-01A-12R-A30B-07	10.2629	high-FANCE	0.659349	0.582572	0.548242	0.537835	0.789167	0.454903	0.440536	0.575916	0.443608	0.290175	0.40836	0.463073	0.144826	0.286672	0.3621	0.548441	0.588228	0.553841	0.651004	0.432632	0.562262	0.579092	0.633127	0.349288	0.178915	0.290392	0.610853	0.129331	0.614305	0.69446	0.482524	0.961434	0.851419
TCGA-CQ-5334-01A-01R-1686-07	10.3275	high-FANCE	0.654337	0.648197	0.568378	0.578883	0.807163	0.495211	0.500986	0.621345	0.477998	0.352047	0.467965	0.575969	0.179063	0.33634	0.436148	0.565064	0.59884	0.554037	0.6954	0.464068	0.518918	0.619066	0.62041	0.391768	0.165703	0.324687	0.644027	0.330051	0.690491	0.804123	0.584554	0.980918	0.936669
TCGA-CR-7365-01A-11R-2016-07	10.344	high-FANCE	0.468879	0.636342	0.44752	0.462031	0.753993	0.475661	0.450626	0.576937	0.405418	0.313906	0.440591	0.430073	0.0940535	0.230562	0.408811	0.535537	0.588309	0.594424	0.565355	0.426796	0.493928	0.641551	0.599487	0.30577	0.182332	0.371174	0.601152	0.366785	0.504625	0.596902	0.326295	0.802349	0.781097
TCGA-CV-A6JZ-01A-11R-A31N-07	10.3584	high-FANCE	0.718776	0.615443	0.582271	0.601061	0.816153	0.438934	0.50783	0.611217	0.491848	0.295612	0.414333	0.601837	0.223534	0.358153	0.407123	0.573798	0.586901	0.615167	0.755153	0.445993	0.546407	0.625604	0.633464	0.424853	0.23188	0.337278	0.612179	0.200025	0.767723	0.831791	0.624089	0.967865	0.898621
TCGA-CN-4726-01A-01R-1436-07	10.3884	high-FANCE	0.483377	0.668685	0.4691	0.519548	0.798813	0.487974	0.496257	0.63185	0.432315	0.301078	0.431559	0.568772	0.0891611	0.251657	0.421322	0.545038	0.59094	0.581483	0.58867	0.4413	0.537727	0.659073	0.662954	0.360474	0.198571	0.406157	0.601687	0.474309	0.595156	0.72374	0.414553	0.670442	0.750461
TCGA-CN-4736-01A-01R-1436-07	10.4409	high-FANCE	0.660625	0.638419	0.566786	0.512543	0.825314	0.48112	0.533376	0.630988	0.498379	0.319119	0.447952	0.593718	0.182545	0.364114	0.393649	0.592738	0.609148	0.629928	0.72478	0.467924	0.554962	0.626361	0.637336	0.384758	0.231645	0.387256	0.615472	0.238085	0.718269	0.830408	0.567424	0.984981	0.966958
TCGA-MT-A67F-01A-11R-A30B-07	10.4534	high-FANCE	0.775567	0.621718	0.616369	0.661618	0.819826	0.489886	0.54843	0.639849	0.523278	0.358853	0.461817	0.584205	0.267818	0.415424	0.373764	0.596824	0.625469	0.547068	0.766651	0.482139	0.622568	0.667208	0.648203	0.44649	0.32353	0.506492	0.638006	0.424549	0.73162	0.871357	0.726123	0.979115	0.953427
TCGA-CV-7406-01A-11R-2081-07	10.4774	high-FANCE	0.40446	0.617329	0.399056	0.468224	0.757083	0.499098	0.412561	0.523942	0.43815	0.319804	0.479819	0.344707	0.0642102	0.167058	0.396611	0.58621	0.561299	0.56767	0.482383	0.388874	0.490116	0.623135	0.631714	0.32697	0.230589	0.379219	0.608521	0.114849	0.377053	0.521873	0.27322	0.448442	0.41228
TCGA-CV-5443-01A-01R-1514-07	10.5356	high-FANCE	0.662946	0.586723	0.56591	0.620501	0.777876	0.465516	0.450449	0.562137	0.492538	0.329079	0.473996	0.499144	0.346114	0.363276	0.388921	0.591505	0.585082	0.612052	0.752271	0.475419	0.537583	0.611802	0.628749	0.367402	0.173728	0.356134	0.642518	0.14149	0.674391	0.808505	0.609544	0.857632	0.488677
TCGA-CX-7086-01A-11R-2081-07	10.5597	high-FANCE	0.480653	0.60133	0.463233	0.578997	0.717933	0.426285	0.426768	0.536534	0.3747	0.3215	0.450302	0.341797	0.156581	0.263312	0.347797	0.47221	0.573283	0.565762	0.527703	0.351629	0.521354	0.596122	0.622142	0.26765	0.226156	0.31407	0.595618	0.372121	0.411195	0.586924	0.330567	0.824267	0.928022
TCGA-CV-5439-01A-01R-1686-07	10.5898	high-FANCE	0.548324	0.562365	0.511515	0.503322	0.750268	0.469324	0.467355	0.550095	0.438844	0.32037	0.425292	0.386686	0.232803	0.295417	0.371738	0.495319	0.568407	0.593856	0.569176	0.398402	0.560251	0.571504	0.611673	0.28639	0.242776	0.311546	0.609806	0.293874	0.464148	0.649439	0.394227	0.878191	0.707058
TCGA-CN-5369-01A-01R-1436-07	10.6373	high-FANCE	0.670648	0.643709	0.590764	0.587433	0.81363	0.453678	0.526673	0.612567	0.500897	0.340639	0.457885	0.537547	0.284711	0.391582	0.36127	0.58858	0.605048	0.577917	0.727925	0.457425	0.581672	0.666745	0.646755	0.385816	0.244533	0.371662	0.630504	0.429536	0.685434	0.819927	0.607722	0.980081	0.924954
TCGA-CV-7097-01A-11R-2016-07	10.6505	high-FANCE	0.573377	0.67543	0.513962	0.538935	0.775999	0.496789	0.491886	0.61666	0.466222	0.282186	0.438433	0.553593	0.152083	0.312946	0.378735	0.572625	0.584979	0.585578	0.678095	0.47557	0.521244	0.61075	0.627323	0.369609	0.221007	0.389165	0.599991	0.218933	0.691625	0.738321	0.478615	0.897393	0.921152
TCGA-CQ-5326-01A-01R-1873-07	10.6535	high-FANCE	0.46847	0.687275	0.515466	0.601824	0.771006	0.484982	0.46577	0.639358	0.438825	0.34369	0.475483	0.622724	0.0584098	0.320217	0.368456	0.577533	0.605778	0.58859	0.645657	0.446939	0.54947	0.65642	0.634651	0.36485	0.180498	0.404587	0.595408	0.405421	0.659963	0.749959	0.428011	0.78061	0.858631
TCGA-CN-5364-01A-01R-1436-07	10.6565	high-FANCE	0.554866	0.601027	0.509912	0.532601	0.749359	0.539928	0.446423	0.574086	0.418329	0.329583	0.467061	0.457726	0.0844641	0.267017	0.448784	0.570165	0.590078	0.609085	0.588734	0.441219	0.515243	0.610609	0.62812	0.332757	0.171287	0.298802	0.604055	0.339078	0.580471	0.658325	0.406347	0.809028	0.872206
TCGA-CV-7252-01A-11R-2016-07	10.6689	high-FANCE	0.526784	0.62987	0.49466	0.525279	0.81613	0.450504	0.442147	0.584795	0.441929	0.294008	0.474458	0.477492	0.17818	0.264211	0.432373	0.564693	0.598474	0.591384	0.588023	0.439982	0.546176	0.626395	0.628001	0.312624	0.251873	0.291739	0.62511	0.302726	0.545308	0.614116	0.404163	0.863839	0.856931
TCGA-CQ-6219-01A-11R-1915-07	10.6759	high-FANCE	0.670124	0.643375	0.566445	0.570504	0.791979	0.466733	0.484453	0.611203	0.47362	0.320742	0.45375	0.55754	0.184742	0.323129	0.407106	0.579959	0.602056	0.590146	0.696578	0.453049	0.566008	0.624066	0.613176	0.371936	0.22833	0.340191	0.612555	0.273615	0.699013	0.778338	0.567924	0.97812	0.927115
TCGA-CQ-A4CB-01A-11R-A24Z-07	10.7061	high-FANCE	0.480988	0.669331	0.520261	0.614261	0.772403	0.509709	0.439652	0.583401	0.445476	0.281196	0.45525	0.567657	0.198126	0.313154	0.437408	0.560286	0.60379	0.601842	0.620974	0.457257	0.497017	0.647422	0.624608	0.354149	0.237247	0.382225	0.599701	0.29727	0.60092	0.690053	0.448011	0.84559	0.932169
TCGA-CN-6988-01A-11R-1915-07	10.7505	high-FANCE	0.426341	0.569258	0.429917	0.419233	0.716628	0.431461	0.406871	0.530758	0.328037	0.374192	0.396771	0.258154	0	0.17004	0.35849	0.487293	0.579643	0.566651	0.421397	0.329161	0.460533	0.613037	0.586845	0.210706	0.172071	0.241837	0.569112	0.227644	0.277035	0.511009	0.171574	0.545924	0.638501
TCGA-CV-7424-01A-11R-2081-07	10.8169	high-FANCE	0.591107	0.609203	0.448887	0.489265	0.751288	0.455011	0.414104	0.557237	0.439921	0.253099	0.360036	0.440347	0.216524	0.246406	0.414544	0.554728	0.590205	0.609968	0.58498	0.422638	0.500847	0.629514	0.630412	0.379752	0.150963	0.289527	0.595165	0.0711977	0.519778	0.658116	0.448685	0.786243	0.623181
TCGA-CN-A497-01A-11R-A24H-07	10.8689	high-FANCE	0.514339	0.584937	0.466958	0.511048	0.752617	0.469419	0.424689	0.543186	0.433711	0.277008	0.403185	0.421709	0.168146	0.249756	0.291091	0.53773	0.603163	0.598229	0.549976	0.40594	0.550197	0.613973	0.692495	0.263124	0.280997	0.341551	0.573055	0.120276	0.460928	0.670386	0.418704	0.692143	0.625533
TCGA-D6-A4Z9-01A-11R-A24Z-07	10.9136	high-FANCE	0.501684	0.602988	0.486001	0.527804	0.757939	0.477152	0.441253	0.582451	0.421179	0.314887	0.445645	0.458662	0.165748	0.255123	0.392052	0.55237	0.570124	0.611137	0.555548	0.430699	0.488535	0.619822	0.608535	0.286679	0.167199	0.336959	0.602481	0.358389	0.504121	0.621374	0.389786	0.906265	0.849785
TCGA-CN-4725-01A-01R-1436-07	10.9155	high-FANCE	0.399464	0.59245	0.402009	0.457054	0.764805	0.487058	0.425465	0.560652	0.38214	0.285731	0.481082	0.428878	0.0926821	0.192672	0.388342	0.502755	0.605699	0.612559	0.470006	0.432484	0.449758	0.605258	0.618018	0.248222	0.158752	0.346239	0.60127	0.349097	0.378409	0.506187	0.270442	0.596955	0.669614
TCGA-CV-7425-01A-11R-2081-07	10.9287	high-FANCE	0.587695	0.584223	0.536	0.505874	0.773966	0.461999	0.487501	0.565243	0.426519	0.299507	0.43555	0.46781	0.214826	0.323708	0.400685	0.493289	0.567999	0.538936	0.611133	0.400803	0.510445	0.604151	0.608025	0.309528	0.181825	0.337823	0.6345	0.375712	0.568917	0.680223	0.490156	0.954339	0.945867
TCGA-CN-6020-01A-11R-1686-07	10.9431	high-FANCE	0.49784	0.633447	0.50554	0.550554	0.768889	0.474507	0.461416	0.623347	0.445361	0.334723	0.470061	0.481682	0.158291	0.265245	0.37711	0.575931	0.596033	0.594893	0.619069	0.437313	0.55128	0.6675	0.635768	0.361158	0.272658	0.396898	0.602702	0.428211	0.586364	0.703123	0.424418	0.828623	0.867761
TCGA-CN-4730-01A-01R-1436-07	10.9963	high-FANCE	0.429247	0.57714	0.405719	0.486036	0.748317	0.472378	0.3825	0.552907	0.375026	0.260078	0.430562	0.391099	0.108193	0.132947	0.385345	0.467282	0.585799	0.606154	0.472212	0.388715	0.488539	0.595272	0.614915	0.24736	0.174793	0.341185	0.598941	0.247324	0.363058	0.48024	0.250899	0.627733	0.517833
TCGA-CV-7101-01A-11R-2016-07	11.0013	high-FANCE	0.535639	0.635558	0.529701	0.519836	0.766361	0.468274	0.454661	0.594813	0.438334	0.293191	0.430376	0.504938	0.295978	0.345787	0.384299	0.562712	0.592345	0.603653	0.639499	0.420186	0.528739	0.639301	0.662663	0.361104	0.256049	0.392816	0.612883	0.287212	0.621956	0.750993	0.476121	0.799753	0.625312
TCGA-CV-7446-01A-11R-2232-07	11.0259	high-FANCE	0.448907	0.599312	0.434589	0.48367	0.735294	0.413247	0.397908	0.566897	0.4044	0.273527	0.429502	0.402708	0.0437434	0.196792	0.397118	0.545986	0.625178	0.552981	0.472206	0.372602	0.505494	0.606558	0.639622	0.275905	0.263338	0.299219	0.573188	0.208488	0.432312	0.642772	0.292152	0.807365	0.708558
TCGA-QK-A8Z9-01B-11R-A39I-07	11.0371	high-FANCE	0.55038	0.624911	0.536905	0.468	0.799132	0.450172	0.481064	0.56194	0.453559	0.266024	0.410055	0.507131	0.105262	0.303432	0.394221	0.561554	0.60097	0.613524	0.651074	0.420257	0.515095	0.623079	0.602411	0.366793	0.222913	0.284956	0.594201	0.193815	0.630532	0.708271	0.45324	0.87714	0.904659
TCGA-CV-7261-11A-01R-2016-07	11.1188	high-FANCE	0.469982	0.572383	0.429352	0.404184	0.718183	0.484809	0.435519	0.530677	0.37556	0.277778	0.377499	0.320167	0.0895644	0.165851	0.410222	0.475024	0.565033	0.603241	0.463167	0.326857	0.450026	0.617449	0.622388	0.255435	0.251105	0.321323	0.596592	0.282636	0.373647	0.581957	0.314393	0.408281	0.561111
TCGA-IQ-A6SH-01A-12R-A34R-07	11.1868	high-FANCE	0.619845	0.60139	0.528829	0.496029	0.766954	0.457201	0.446888	0.61531	0.427624	0.332792	0.462491	0.479628	0.198821	0.266833	0.349933	0.514928	0.617732	0.598646	0.623734	0.44696	0.515561	0.626347	0.58018	0.324362	0.174664	0.338808	0.605833	0.278207	0.57355	0.588969	0.465581	0.924377	0.966247
TCGA-D6-6826-01A-11R-1915-07	11.2384	high-FANCE	0.52646	0.70081	0.558396	0.609211	0.791991	0.465308	0.498941	0.668591	0.470796	0.336974	0.481212	0.713193	0.198597	0.345269	0.418731	0.59969	0.595171	0.59792	0.721824	0.448074	0.56861	0.714575	0.667849	0.443085	0.201311	0.472543	0.623825	0.413903	0.758436	0.903168	0.558878	0.828345	0.849311
TCGA-F7-A50G-01A-11R-A266-07	11.2834	high-FANCE	0.598967	0.600605	0.539908	0.52208	0.770974	0.474264	0.51079	0.624605	0.439776	0.322741	0.457659	0.503278	0.171676	0.318231	0.357143	0.535223	0.616119	0.612877	0.64274	0.427227	0.553812	0.639096	0.623192	0.338455	0.217157	0.387015	0.614717	0.43707	0.606095	0.752937	0.517596	0.961417	0.949571
TCGA-CV-7255-01A-11R-2016-07	11.324	high-FANCE	0.4174	0.567858	0.361629	0.448513	0.763402	0.453847	0.375143	0.556355	0.376404	0.290611	0.440319	0.404715	0.0604657	0.161856	0.356071	0.553151	0.59731	0.571648	0.462119	0.408046	0.46448	0.607779	0.594004	0.221453	0.132369	0.31466	0.599948	0.347147	0.286364	0.409745	0.23095	0.68831	0.904479
TCGA-C9-A47Z-01A-11R-A24H-07	11.3283	high-FANCE	0.49374	0.586758	0.4578	0.449995	0.745441	0.451069	0.449523	0.581094	0.388302	0.290245	0.42825	0.403459	0.0944444	0.212983	0.31997	0.484656	0.601293	0.599078	0.505853	0.418525	0.481279	0.640163	0.585353	0.261701	0.157454	0.273889	0.59638	0.390491	0.400372	0.558645	0.325708	0.924991	0.910099
TCGA-CV-5434-01A-01R-1686-07	11.3511	high-FANCE	0.517421	0.681592	0.520183	0.524144	0.796676	0.517328	0.508988	0.619369	0.451846	0.238385	0.460087	0.583592	0.16842	0.260843	0.415134	0.570281	0.578861	0.606346	0.672763	0.467378	0.506017	0.627508	0.618149	0.417088	0.187495	0.364475	0.60843	0.145821	0.697582	0.796252	0.493554	0.792265	0.877588
TCGA-UF-A7JO-01A-11R-A34R-07	11.4188	high-FANCE	0.68382	0.634984	0.597635	0.618064	0.809132	0.474872	0.51043	0.627774	0.485978	0.316811	0.427168	0.618129	0.178001	0.360972	0.394051	0.563118	0.590944	0.646883	0.747864	0.441986	0.597854	0.628896	0.632092	0.4592	0.262977	0.315198	0.615531	0.28382	0.777381	0.844899	0.627663	0.97613	0.936235
TCGA-CV-7432-01A-11R-2132-07	11.4422	high-FANCE	0.443079	0.595305	0.449686	0.52389	0.754814	0.456287	0.398808	0.590824	0.381807	0.277009	0.468328	0.47331	0.100079	0.177025	0.378292	0.509348	0.574317	0.592006	0.542705	0.442268	0.479388	0.581888	0.603122	0.282367	0.17961	0.307992	0.604778	0.300557	0.450156	0.553305	0.25597	0.880459	0.749019
TCGA-BA-A6DE-01A-22R-A31N-07	11.5049	high-FANCE	0.494457	0.552764	0.457777	0.496471	0.747419	0.433416	0.424448	0.538523	0.387535	0.257823	0.438114	0.338647	0.120332	0.194774	0.407584	0.490248	0.57345	0.563136	0.454046	0.379989	0.478023	0.612727	0.586072	0.223969	0.196198	0.303255	0.583046	0.310474	0.328313	0.567307	0.300465	0.871059	0.877969
TCGA-CV-7422-01A-21R-2081-07	11.5587	high-FANCE	0.527013	0.622876	0.482556	0.593713	0.742996	0.467726	0.442068	0.56958	0.420675	0.318487	0.476767	0.452317	0.269161	0.323726	0.376524	0.536001	0.582209	0.556748	0.586779	0.426021	0.484031	0.628503	0.619656	0.316275	0.238602	0.36458	0.604876	0.216217	0.537616	0.686799	0.41055	0.865542	0.945256
TCGA-BA-A6DD-01A-12R-A31N-07	11.5749	high-FANCE	0.655794	0.600261	0.554697	0.580668	0.768122	0.470066	0.465156	0.60098	0.466197	0.332885	0.45415	0.494237	0.257802	0.300121	0.371782	0.539217	0.586451	0.588041	0.642569	0.415385	0.539903	0.623926	0.609252	0.340585	0.210754	0.280765	0.594827	0.338019	0.593444	0.688719	0.529595	0.959973	0.947818
TCGA-UP-A6WW-01A-12R-A34R-07	11.6057	high-FANCE	0.572643	0.583966	0.526011	0.515781	0.740243	0.497636	0.438477	0.584924	0.461927	0.35803	0.394681	0.481178	0.205226	0.263706	0.428306	0.531551	0.567917	0.647434	0.653262	0.420812	0.556015	0.627395	0.626503	0.366227	0.152756	0.292198	0.604915	0.194781	0.605515	0.659586	0.476923	0.812547	0.65674
TCGA-CN-A49B-01A-31R-A24H-07	11.6226	high-FANCE	0.630821	0.622771	0.556473	0.624401	0.778916	0.447931	0.464625	0.600546	0.473587	0.340873	0.499009	0.528642	0.187106	0.32816	0.356198	0.575414	0.628378	0.598667	0.693217	0.450632	0.548851	0.589653	0.645209	0.404331	0.280931	0.383997	0.591642	0.260227	0.684772	0.758708	0.537846	0.940416	0.943188
TCGA-BA-A6DI-01A-11R-A30B-07	11.625	high-FANCE	0.472318	0.566537	0.49725	0.456853	0.744037	0.442383	0.387755	0.529495	0.397052	0.31266	0.455652	0.364202	0.137098	0.209532	0.347114	0.505951	0.608125	0.614973	0.473132	0.402013	0.48817	0.627576	0.637104	0.251484	0.249712	0.380574	0.576825	0.321622	0.338784	0.595212	0.277652	0.864492	0.72577
TCGA-IQ-A61H-01A-11R-A30B-07	11.6834	high-FANCE	0.492696	0.635044	0.425169	0.502459	0.749798	0.434324	0.41273	0.559565	0.397039	0.248017	0.441335	0.398136	0.134402	0.179184	0.390196	0.533397	0.586804	0.604846	0.521641	0.40173	0.479242	0.608471	0.628132	0.336833	0.150314	0.309133	0.58221	0.200848	0.491248	0.571798	0.303162	0.752783	0.546873
TCGA-D6-6823-01A-11R-1915-07	11.7015	high-FANCE	0.447762	0.616164	0.427491	0.506576	0.74979	0.469312	0.407859	0.556913	0.378973	0.291797	0.466243	0.412478	0.149741	0.21988	0.372509	0.506352	0.592596	0.631286	0.510921	0.386092	0.487863	0.618757	0.61079	0.284234	0.14144	0.345559	0.590147	0.316588	0.411264	0.584452	0.32336	0.748253	0.90673
TCGA-CV-7178-01A-21R-2016-07	11.7119	high-FANCE	0.621135	0.667671	0.521629	0.565197	0.788537	0.507811	0.478095	0.580464	0.472539	0.25708	0.457174	0.501668	0.151268	0.290621	0.406624	0.582779	0.592549	0.564894	0.674098	0.447282	0.542773	0.578519	0.62302	0.350739	0.232461	0.363615	0.591006	0.189246	0.639917	0.757687	0.490057	0.878019	0.769937
TCGA-CV-7253-01A-11R-2016-07	11.7233	high-FANCE	0.432313	0.566178	0.405816	0.419918	0.730998	0.394955	0.36034	0.555207	0.344269	0.263095	0.423839	0.331847	0.0234384	0.159857	0.383289	0.477284	0.590905	0.581745	0.399677	0.382029	0.461926	0.582125	0.599901	0.197369	0.208737	0.284363	0.577584	0.207406	0.233297	0.493052	0.182025	0.518025	0.519178
TCGA-CR-6481-01A-11R-1873-07	11.736	high-FANCE	0.75426	0.620887	0.651107	0.698738	0.821052	0.502306	0.516191	0.626722	0.547276	0.348647	0.519894	0.62553	0.567961	0.563243	0.451117	0.6152	0.621425	0.638357	0.788673	0.481219	0.585042	0.645104	0.638823	0.438424	0.232732	0.437964	0.676146	0.271633	0.786219	0.933958	0.78067	0.927248	0.786274
TCGA-CR-7369-01A-11R-2132-07	11.7592	high-FANCE	0.509932	0.636556	0.469724	0.569057	0.75968	0.479589	0.449016	0.559382	0.422027	0.313661	0.473808	0.403797	0.224555	0.281563	0.409083	0.564485	0.582261	0.587521	0.563076	0.404444	0.51491	0.615683	0.606411	0.297587	0.245581	0.426998	0.596553	0.292204	0.483637	0.681594	0.433746	0.630744	0.72892
TCGA-CN-6024-01A-11R-1686-07	11.7803	high-FANCE	0.379256	0.634061	0.386589	0.419452	0.724096	0.435879	0.401519	0.553755	0.373241	0.268818	0.456116	0.354644	0.0367507	0.100169	0.372841	0.500837	0.58922	0.589419	0.458756	0.4188	0.474806	0.616539	0.584467	0.286349	0.224586	0.367138	0.580514	0.245169	0.33986	0.423871	0.162151	0.504341	0.568979
TCGA-CV-7263-01A-11R-2016-07	11.7968	high-FANCE	0.559445	0.630926	0.479374	0.48739	0.786082	0.508513	0.477893	0.585738	0.446295	0.284818	0.391395	0.497747	0.235379	0.275949	0.36794	0.560632	0.575316	0.623161	0.638365	0.412181	0.535443	0.632238	0.62409	0.373527	0.224673	0.41337	0.610111	0.16237	0.615947	0.731693	0.471606	0.774531	0.724732
TCGA-CR-6491-01A-11R-1873-07	11.9297	high-FANCE	0.54007	0.56941	0.475435	0.517916	0.750063	0.451093	0.427243	0.566374	0.409585	0.315158	0.460842	0.385526	0.115516	0.214318	0.379508	0.505594	0.576181	0.578178	0.502444	0.415292	0.528784	0.604209	0.576285	0.232115	0.159105	0.310402	0.580296	0.356146	0.377856	0.541592	0.352611	0.817977	0.75592
TCGA-H7-A76A-01A-51R-A34R-07	11.9701	high-FANCE	0.735113	0.619154	0.626994	0.657217	0.811803	0.511693	0.520665	0.581334	0.529265	0.312954	0.416055	0.587936	0.485119	0.462854	0.37614	0.611854	0.590519	0.657947	0.791144	0.468394	0.556535	0.65081	0.634834	0.468189	0.234632	0.397261	0.65896	0.242305	0.793649	0.826686	0.736672	0.893154	0.747658
TCGA-CN-6022-01A-21R-1686-07	12.0092	high-FANCE	0.472574	0.645876	0.496404	0.529381	0.786328	0.51656	0.485762	0.579058	0.469698	0.313469	0.430589	0.591749	0.109758	0.269958	0.394576	0.600202	0.606851	0.586476	0.664834	0.44199	0.543512	0.646689	0.622984	0.398839	0.172967	0.358503	0.625767	0.264654	0.690823	0.755765	0.465272	0.646951	0.615201
TCGA-CQ-A4CD-01A-21R-A24Z-07	12.0442	high-FANCE	0.527032	0.621799	0.561881	0.602788	0.767811	0.467636	0.424652	0.592348	0.455007	0.307171	0.457049	0.49574	0.168619	0.271884	0.347	0.53889	0.601856	0.578682	0.639998	0.444567	0.582072	0.565153	0.622866	0.36629	0.227071	0.302653	0.581168	0.321929	0.594602	0.652508	0.418024	0.953031	0.951719
TCGA-CQ-6225-01A-11R-1915-07	12.0734	high-FANCE	0.416127	0.603432	0.387685	0.46447	0.708691	0.453084	0.377306	0.534758	0.346331	0.269549	0.361866	0.295143	0.0254629	0.123033	0.410275	0.439539	0.602186	0.593134	0.434402	0.363809	0.484315	0.609536	0.61675	0.256257	0.16209	0.231365	0.579684	0.277963	0.328331	0.492916	0.218081	0.452445	0.364801
TCGA-CQ-5332-01A-01R-1686-07	12.0813	high-FANCE	0.460361	0.653078	0.457519	0.50965	0.761812	0.463419	0.457165	0.572042	0.41892	0.260505	0.42288	0.458227	0.099019	0.208435	0.399731	0.5304	0.576723	0.581952	0.572233	0.414657	0.475783	0.590129	0.599822	0.297924	0.180794	0.342958	0.582199	0.200348	0.512196	0.631334	0.325466	0.487346	0.365582
TCGA-IQ-7630-01A-11R-2081-07	12.1015	high-FANCE	0.536654	0.614011	0.465819	0.530308	0.769295	0.445581	0.425012	0.579193	0.400827	0.26992	0.450591	0.490362	0.0685418	0.248162	0.400653	0.534498	0.60671	0.598423	0.583329	0.43713	0.525827	0.610199	0.623814	0.326612	0.235009	0.267037	0.600356	0.26375	0.556544	0.634341	0.393876	0.858959	0.946526
TCGA-CN-A499-01A-11R-A24H-07	12.1521	high-FANCE	0.652883	0.601188	0.564274	0.640154	0.772641	0.480711	0.438631	0.579635	0.455542	0.318657	0.517473	0.509558	0.211622	0.340624	0.37508	0.523581	0.61043	0.606444	0.661331	0.428948	0.539172	0.630158	0.635266	0.320029	0.204149	0.332803	0.583042	0.305004	0.614948	0.772669	0.551693	0.996138	0.982831
TCGA-BA-4077-01B-01R-1436-07	12.2481	high-FANCE	0.608523	0.636146	0.554372	0.570317	0.787968	0.465592	0.468185	0.599112	0.46977	0.353555	0.493734	0.510401	0.178548	0.310192	0.432099	0.587962	0.606926	0.594241	0.660625	0.459336	0.56651	0.610948	0.664136	0.386011	0.200412	0.359966	0.606947	0.27871	0.662603	0.795083	0.520357	0.971066	0.878182
TCGA-F7-8489-01A-31R-2403-07	12.3279	high-FANCE	0.643235	0.622487	0.576646	0.593911	0.802739	0.459117	0.472217	0.565703	0.468483	0.335719	0.459163	0.478841	0.24826	0.34556	0.450829	0.580149	0.589163	0.62459	0.648188	0.418375	0.558104	0.627561	0.622654	0.36936	0.282946	0.31536	0.613726	0.246965	0.57202	0.751629	0.566182	0.954629	0.931542
TCGA-CX-A4AQ-01A-11R-A24Z-07	12.354	high-FANCE	0.669945	0.543346	0.557138	0.605425	0.785934	0.477814	0.477237	0.543378	0.517637	0.297443	0.472268	0.490069	0.536805	0.466786	0.421246	0.573461	0.603039	0.649467	0.71986	0.470121	0.563859	0.635433	0.567023	0.386011	0.258329	0.273897	0.613987	0.155413	0.649894	0.700603	0.648015	0.835175	0.706742
TCGA-HL-7533-01A-11R-2232-07	12.3777	high-FANCE	0.652304	0.575711	0.528313	0.57457	0.763687	0.476572	0.452286	0.552112	0.458531	0.318506	0.497666	0.418584	0.168363	0.29365	0.3791	0.531453	0.576173	0.583907	0.587252	0.435854	0.534128	0.567738	0.598598	0.300683	0.140312	0.237891	0.599486	0.253959	0.523569	0.648291	0.450162	0.959768	0.947146
TCGA-BA-6871-01A-11R-1873-07	12.4633	high-FANCE	0.637276	0.62823	0.471821	0.585101	0.736296	0.508938	0.42147	0.560481	0.478376	0.300892	0.462849	0.484164	0.238657	0.214652	0.38752	0.569579	0.595336	0.615988	0.643467	0.453524	0.507351	0.590476	0.573092	0.36865	0.166298	0.388617	0.595	0.173315	0.558887	0.686873	0.4596	0.813745	0.714409
TCGA-CX-7082-01A-11R-2016-07	12.5064	high-FANCE	0.489458	0.606415	0.468477	0.512217	0.744323	0.459234	0.431181	0.57146	0.408929	0.277808	0.438048	0.387829	0.0955347	0.216666	0.387904	0.546055	0.583254	0.597643	0.530217	0.421462	0.491483	0.616774	0.547423	0.282494	0.201547	0.298059	0.566142	0.118221	0.494125	0.6021	0.334641	0.831	0.683723
TCGA-MZ-A6I9-01A-11R-A31N-07	12.5741	high-FANCE	0.531965	0.554418	0.424327	0.478111	0.722474	0.436543	0.399149	0.534105	0.392835	0.305002	0.397076	0.336837	0.297885	0.237556	0.354889	0.491232	0.557935	0.634994	0.523356	0.343315	0.538512	0.613979	0.595744	0.250939	0.190174	0.279778	0.611836	0.178476	0.396192	0.563839	0.384829	0.592172	0.602851
TCGA-CN-A63U-01A-11R-A30B-07	12.6451	high-FANCE	0.48185	0.519208	0.359417	0.461332	0.720279	0.439788	0.371707	0.520565	0.362654	0.207241	0.347157	0.272124	0.137432	0.182953	0.359894	0.460751	0.603376	0.61429	0.441514	0.345326	0.464691	0.565988	0.656013	0.273959	0.177625	0.287672	0.573468	0.0881473	0.285007	0.478365	0.23277	0.649409	0.82293
TCGA-CV-7429-01A-11R-2132-07	12.6542	high-FANCE	0.546924	0.653793	0.473763	0.527251	0.775941	0.483015	0.437673	0.576667	0.412929	0.281022	0.407478	0.488883	0.0721027	0.259372	0.382187	0.549194	0.591825	0.585896	0.614318	0.447302	0.528843	0.622885	0.617912	0.376522	0.233615	0.294918	0.607113	0.171162	0.622777	0.641132	0.433683	0.708791	0.820008
TCGA-P3-A6T5-01A-11R-A34R-07	12.694	high-FANCE	0.487178	0.568822	0.478746	0.456287	0.759947	0.461608	0.45517	0.585453	0.408543	0.312266	0.420593	0.466353	0.127118	0.216645	0.389456	0.520407	0.576149	0.601983	0.562284	0.407804	0.529127	0.605763	0.59079	0.318157	0.197069	0.329184	0.600815	0.402768	0.531038	0.586114	0.364899	0.709294	0.87911
TCGA-CV-6959-01A-11R-1915-07	12.7021	high-FANCE	0.504026	0.632186	0.544641	0.557826	0.788919	0.499868	0.460179	0.606833	0.44604	0.276579	0.46721	0.577466	0.192004	0.304625	0.385918	0.576362	0.609044	0.569921	0.617769	0.468456	0.531282	0.626621	0.620949	0.344792	0.224043	0.400919	0.605182	0.347327	0.585597	0.731652	0.461784	0.927176	0.825901
TCGA-UF-A718-01A-22R-A34R-07	12.704	high-FANCE	0.577772	0.617632	0.496602	0.517302	0.759052	0.451869	0.439691	0.603471	0.447117	0.310201	0.457164	0.455672	0.202463	0.262014	0.348781	0.552608	0.597663	0.630838	0.578661	0.435537	0.543074	0.616907	0.587104	0.28564	0.171214	0.340679	0.628914	0.313406	0.479097	0.622781	0.453828	0.77391	0.69467
TCGA-CN-A6V6-01A-12R-A34R-07	12.706	high-FANCE	0.704318	0.57907	0.565076	0.640489	0.777665	0.488045	0.449334	0.562764	0.46027	0.314576	0.467284	0.451945	0.288003	0.361198	0.339273	0.595266	0.583406	0.574952	0.685057	0.438883	0.537776	0.614463	0.626687	0.325031	0.254587	0.375432	0.613433	0.284355	0.627502	0.816475	0.607646	0.961518	0.905654
TCGA-CQ-7068-01A-11R-2081-07	12.7376	high-FANCE	0.708086	0.589938	0.589937	0.593551	0.80914	0.443099	0.465356	0.599485	0.480911	0.324316	0.479377	0.499997	0.241612	0.385594	0.358913	0.562495	0.616488	0.579187	0.701292	0.461408	0.581179	0.583016	0.620123	0.361278	0.20786	0.307497	0.628102	0.300561	0.663999	0.788218	0.58182	1	0.982816
TCGA-CR-7390-01A-11R-2016-07	12.747	high-FANCE	0.399835	0.63449	0.445245	0.50364	0.741275	0.489204	0.412713	0.594454	0.409221	0.309448	0.4527	0.471432	0.121112	0.176658	0.367537	0.501585	0.566425	0.587439	0.503783	0.412519	0.509576	0.63788	0.623864	0.287288	0.224206	0.343046	0.582102	0.414065	0.437009	0.592753	0.309659	0.43798	0.318653
TCGA-BA-A4IH-01A-11R-A266-07	12.7717	high-FANCE	0.547401	0.577475	0.499824	0.628941	0.735635	0.490735	0.414932	0.514749	0.441121	0.315788	0.514794	0.404601	0.178709	0.218154	0.407151	0.56107	0.600242	0.568634	0.545641	0.419233	0.526327	0.611535	0.658931	0.280389	0.311664	0.322958	0.57552	0.278359	0.449182	0.672027	0.387531	0.899822	0.868895
TCGA-CV-5432-01A-02R-1686-07	12.8235	high-FANCE	0.508996	0.596302	0.441534	0.459479	0.748451	0.463594	0.409675	0.574307	0.379378	0.279645	0.447288	0.3902	0.131294	0.18758	0.323451	0.488828	0.588603	0.596868	0.544649	0.389364	0.513957	0.608189	0.577775	0.283297	0.119247	0.263682	0.564685	0.261847	0.483893	0.541731	0.316992	0.651666	0.563694
TCGA-DQ-7592-01A-11R-2081-07	12.8478	high-FANCE	0.527612	0.643288	0.469147	0.518791	0.781568	0.45267	0.465199	0.57517	0.425077	0.293432	0.440053	0.447319	0.119002	0.261409	0.381565	0.552977	0.597233	0.611279	0.584792	0.420655	0.530776	0.616345	0.601838	0.3369	0.195624	0.34993	0.602021	0.254234	0.513243	0.632108	0.386606	0.941255	0.927778
TCGA-CV-6941-01A-11R-1915-07	12.8782	high-FANCE	0.486151	0.663047	0.483393	0.511043	0.772516	0.459035	0.449983	0.587314	0.420301	0.259172	0.404217	0.464367	0.161487	0.276865	0.375579	0.54311	0.594165	0.576054	0.581566	0.409679	0.490783	0.62711	0.604455	0.323638	0.195309	0.336019	0.595927	0.23614	0.525259	0.650022	0.370724	0.786739	0.920795
TCGA-P3-A6T8-01A-11R-A34R-07	12.9171	high-FANCE	0.397101	0.619344	0.424271	0.451391	0.769659	0.504751	0.403423	0.533626	0.432117	0.288606	0.425802	0.426853	0.0663113	0.139705	0.399905	0.547042	0.609057	0.628891	0.467571	0.446838	0.530828	0.636377	0.576037	0.282949	0.139171	0.314192	0.583242	0.199153	0.364606	0.457518	0.27894	0.588192	0.612456
TCGA-CQ-6220-01A-11R-1915-07	12.9423	high-FANCE	0.55111	0.594394	0.525795	0.504415	0.754411	0.470185	0.463763	0.593779	0.417554	0.325758	0.458162	0.465433	0.12245	0.279669	0.3247	0.500388	0.595356	0.557176	0.577223	0.411394	0.546689	0.636832	0.595297	0.286608	0.223231	0.332422	0.607269	0.419094	0.510859	0.604261	0.375134	0.930853	0.903807
TCGA-UF-A7JK-01A-11R-A34R-07	13.0579	high-FANCE	0.396763	0.574969	0.36878	0.363234	0.725108	0.451708	0.381437	0.553583	0.346283	0.314911	0.447333	0.374513	0.015233	0.107395	0.392282	0.449116	0.582885	0.602973	0.403635	0.36469	0.434088	0.619997	0.591371	0.270514	0.144138	0.247665	0.576307	0.260879	0.221877	0.38792	0.153174	0.535624	0.549607
TCGA-CR-6471-01A-11R-1873-07	13.0751	high-FANCE	0.64268	0.638212	0.561595	0.61677	0.791185	0.493825	0.493307	0.594743	0.486183	0.331012	0.479019	0.502066	0.249745	0.336851	0.451104	0.581453	0.572119	0.58405	0.65506	0.419575	0.529494	0.614901	0.613827	0.36717	0.251592	0.37255	0.632474	0.385653	0.582751	0.775317	0.588178	0.902022	0.81433
TCGA-CN-4739-01A-02R-1514-07	13.139	high-FANCE	0.613089	0.614432	0.496756	0.592581	0.76849	0.447263	0.45155	0.540948	0.451525	0.334699	0.407939	0.405112	0.289037	0.336374	0.409227	0.564222	0.568157	0.585707	0.629985	0.360334	0.556759	0.641288	0.627789	0.350753	0.185575	0.308339	0.631021	0.434789	0.53087	0.743854	0.520126	0.649343	0.588071
TCGA-CN-5365-01A-01R-1436-07	13.2403	high-FANCE	0.576206	0.603184	0.50807	0.511297	0.785983	0.429892	0.487316	0.62191	0.430192	0.307813	0.472423	0.522074	0.149917	0.272552	0.408656	0.504782	0.582933	0.617656	0.649447	0.447608	0.561919	0.604653	0.615174	0.348023	0.193947	0.279869	0.590804	0.319483	0.637366	0.657651	0.430882	0.923684	0.868135
TCGA-BA-A4IG-01A-11R-A266-07	13.2465	high-FANCE	0.566386	0.573272	0.479074	0.604309	0.739366	0.42834	0.413744	0.538365	0.424733	0.26803	0.492845	0.383449	0.308839	0.339843	0.386654	0.512136	0.58026	0.575192	0.549335	0.413267	0.516033	0.583248	0.625458	0.290365	0.237946	0.367803	0.606664	0.247597	0.434824	0.686013	0.482446	0.809325	0.722752
TCGA-CV-A461-01A-41R-A266-07	13.2715	high-FANCE	0.721586	0.614607	0.56628	0.558938	0.801227	0.462147	0.523235	0.62045	0.463215	0.283799	0.4332	0.526029	0.264593	0.351892	0.404096	0.524458	0.621322	0.5789	0.717625	0.426257	0.550465	0.61443	0.609154	0.34787	0.21906	0.331069	0.570875	0.222429	0.66503	0.775528	0.593353	0.960276	0.976788
TCGA-CV-6945-01A-11R-1915-07	13.3178	high-FANCE	0.418478	0.594126	0.399208	0.42647	0.754254	0.473777	0.406293	0.57279	0.37511	0.288264	0.417547	0.381492	0.0431535	0.1388	0.359555	0.4835	0.572563	0.618328	0.474613	0.425463	0.552457	0.609982	0.580054	0.269528	0.153266	0.22894	0.592915	0.301396	0.39952	0.445592	0.227458	0.599916	0.711909
TCGA-BA-4075-01A-01R-1436-07	13.3657	high-FANCE	0.481016	0.60247	0.435937	0.558754	0.747768	0.462299	0.446545	0.652725	0.437547	0.241297	0.473188	0.537305	0.0334847	0.255715	0.394416	0.545987	0.625492	0.564666	0.58944	0.445596	0.547022	0.599276	0.64199	0.352293	0.190299	0.3333	0.617335	0.345107	0.601081	0.680156	0.407064	0.635336	0.66749
TCGA-F7-A61W-01A-11R-A28V-07	13.367	high-FANCE	0.409976	0.563292	0.40665	0.454347	0.728538	0.456314	0.397654	0.552174	0.357802	0.242303	0.472702	0.365548	0.0654365	0.16883	0.379818	0.50185	0.586893	0.572934	0.43773	0.389656	0.447271	0.606294	0.621947	0.259165	0.203987	0.280304	0.571823	0.257299	0.346673	0.446147	0.223944	0.670866	0.820047
TCGA-CN-5374-01A-01R-1436-07	13.389	high-FANCE	0.710832	0.578324	0.531952	0.620774	0.764534	0.422188	0.445337	0.544119	0.464748	0.322356	0.437963	0.406429	0.387413	0.371268	0.431447	0.580179	0.585116	0.595371	0.643967	0.423661	0.540873	0.578472	0.617181	0.339027	0.191765	0.26582	0.619289	0.160663	0.543238	0.774282	0.643456	0.867536	0.654281
TCGA-HD-8314-01A-11R-2403-07	13.5635	high-FANCE	0.535198	0.665809	0.512795	0.537882	0.770554	0.480135	0.503683	0.579538	0.432444	0.291948	0.444754	0.504011	0.169228	0.30219	0.384439	0.580944	0.544539	0.563399	0.658392	0.41453	0.486246	0.648263	0.58442	0.366151	0.17863	0.346267	0.58822	0.0875562	0.680816	0.778521	0.525422	0.754897	0.842252
TCGA-CQ-5329-01A-01R-1686-07	13.5786	high-FANCE	0.572844	0.610973	0.513737	0.573045	0.802933	0.445096	0.467709	0.616419	0.431934	0.292293	0.427637	0.559874	0.123709	0.316447	0.368873	0.567778	0.623338	0.555497	0.681021	0.449976	0.528825	0.590469	0.606411	0.362892	0.153582	0.330477	0.614478	0.252241	0.683711	0.771794	0.503468	0.950055	0.900953
TCGA-CV-A460-01A-21R-A24Z-07	13.6375	high-FANCE	0.636238	0.613469	0.535954	0.624031	0.791708	0.470154	0.486799	0.568829	0.50186	0.326485	0.448156	0.512583	0.311728	0.356699	0.384529	0.587796	0.589566	0.661069	0.702227	0.468032	0.561401	0.646785	0.610962	0.370109	0.224275	0.393847	0.625181	0.219032	0.642945	0.786408	0.607762	0.873699	0.806131
TCGA-CV-5976-01A-11R-1686-07	13.6464	high-FANCE	0.455701	0.611423	0.425643	0.443898	0.766265	0.450822	0.418371	0.576796	0.405541	0.29754	0.431143	0.436933	0.0776539	0.190659	0.363811	0.561571	0.579886	0.555823	0.520791	0.422007	0.484323	0.612303	0.604478	0.279632	0.221605	0.252054	0.595526	0.20879	0.472807	0.539925	0.286907	0.848011	0.83459
TCGA-CV-A45Z-01A-21R-A24Z-07	13.7843	high-FANCE	0.597136	0.600489	0.506371	0.510024	0.770209	0.428622	0.46542	0.584391	0.42029	0.305981	0.412105	0.428383	0.150103	0.270343	0.379889	0.546049	0.602815	0.618502	0.609178	0.412848	0.520918	0.628988	0.601752	0.327655	0.149153	0.251592	0.595041	0.220918	0.576575	0.703064	0.46327	0.875072	0.777416
TCGA-DQ-7588-01A-11R-2081-07	13.8978	high-FANCE	0.422157	0.562399	0.343065	0.503606	0.721919	0.459496	0.355229	0.50889	0.372583	0.269886	0.493714	0.330172	0.123009	0.0829929	0.388219	0.439659	0.575454	0.600254	0.392413	0.394181	0.432941	0.586768	0.597584	0.216717	0.125199	0.282434	0.595778	0.252114	0.166092	0.297643	0.191399	0.506627	0.437549
TCGA-BA-6873-01A-11R-1873-07	13.9359	high-FANCE	0.553877	0.625187	0.496943	0.550273	0.773205	0.474863	0.448694	0.571486	0.426549	0.298799	0.439656	0.452414	0.159081	0.279009	0.395794	0.559139	0.603294	0.561159	0.585515	0.443224	0.487704	0.583503	0.596027	0.308915	0.197446	0.267622	0.606084	0.261738	0.50777	0.6369	0.419202	0.957223	0.920044
TCGA-BB-A5HY-01A-11R-A28V-07	13.9365	high-FANCE	0.454829	0.579748	0.412092	0.565749	0.739244	0.450817	0.381287	0.552573	0.396028	0.309143	0.423229	0.431871	0.105607	0.129448	0.376359	0.513082	0.616106	0.626355	0.482468	0.395168	0.46824	0.623373	0.57888	0.264237	0.188425	0.242305	0.596709	0.201941	0.367932	0.514564	0.282853	0.701281	0.773877
TCGA-UF-A71A-01A-22R-A34R-07	13.9875	high-FANCE	0.41834	0.614828	0.432419	0.404379	0.721343	0.440576	0.444582	0.563008	0.386489	0.29135	0.387216	0.419386	0.0699991	0.146947	0.40945	0.532078	0.578658	0.599503	0.509485	0.40723	0.46681	0.627166	0.578504	0.362217	0.183147	0.285969	0.570046	0.112058	0.49233	0.535069	0.26722	0.455775	0.39771
TCGA-P3-A6T3-01A-11R-A34R-07	14.0501	high-FANCE	0.410682	0.579695	0.408271	0.441615	0.734697	0.41104	0.410134	0.555803	0.375731	0.305338	0.440216	0.398903	0.0472498	0.153692	0.354437	0.508961	0.60477	0.580765	0.454457	0.42777	0.5173	0.616149	0.614542	0.259925	0.214401	0.278908	0.586615	0.337871	0.356913	0.438846	0.249202	0.72665	0.584787
TCGA-HD-8224-01A-11R-2403-07	14.0707	high-FANCE	0.466202	0.618082	0.489039	0.41588	0.739414	0.472205	0.446267	0.555269	0.407561	0.301272	0.365079	0.435314	0.0606602	0.192677	0.397021	0.584094	0.547081	0.629687	0.550476	0.413911	0.491347	0.634117	0.649607	0.298219	0.18204	0.276466	0.575761	0.137108	0.512816	0.636693	0.324014	0.609083	0.567649
TCGA-UF-A7JH-01A-21R-A34R-07	14.4178	high-FANCE	0.57847	0.618189	0.529727	0.532664	0.787341	0.479973	0.483948	0.571795	0.432165	0.280224	0.404335	0.467921	0.148845	0.264904	0.345256	0.542144	0.574528	0.632383	0.640632	0.431381	0.536414	0.619575	0.594444	0.366478	0.224674	0.352011	0.572025	0.246569	0.627245	0.669629	0.422654	0.88326	0.793992
TCGA-CR-7398-01A-11R-2016-07	14.4187	high-FANCE	0.451719	0.609601	0.398363	0.497299	0.751886	0.47354	0.440008	0.563607	0.407034	0.183673	0.452038	0.428821	0.101621	0.25326	0.379648	0.546047	0.58126	0.565193	0.549056	0.401595	0.449882	0.601893	0.584024	0.327051	0.215691	0.402026	0.617379	0.162531	0.510679	0.669787	0.395224	0.665287	0.776075
TCGA-UF-A7J9-01A-12R-A34R-07	14.4202	high-FANCE	0.477767	0.64065	0.497776	0.496492	0.74944	0.489035	0.457317	0.581491	0.430125	0.305746	0.449161	0.496894	0.041951	0.213814	0.424629	0.565429	0.577139	0.582041	0.582452	0.425888	0.505576	0.646308	0.610946	0.353289	0.143024	0.314903	0.556032	0.120601	0.56682	0.654543	0.386479	0.670467	0.53887
TCGA-CN-5363-01A-01R-1436-07	14.5062	high-FANCE	0.588362	0.646973	0.541727	0.554909	0.777604	0.473202	0.47159	0.598741	0.464255	0.277434	0.424599	0.503476	0.159523	0.323861	0.406324	0.584015	0.60463	0.570003	0.656666	0.448782	0.522191	0.59974	0.607706	0.359125	0.180643	0.326433	0.614339	0.160043	0.62673	0.739791	0.4842	0.984339	0.887369
TCGA-CN-4723-01A-01R-1436-07	14.5992	high-FANCE	0.527488	0.635669	0.498252	0.555113	0.768237	0.505234	0.433854	0.540793	0.424583	0.298851	0.425548	0.520185	0.177356	0.286031	0.39893	0.546052	0.586175	0.632016	0.638168	0.437787	0.527187	0.657819	0.638823	0.344306	0.198742	0.363746	0.588391	0.256398	0.587825	0.719908	0.445408	0.859514	0.844087
TCGA-HD-7832-01A-11R-2132-07	14.5997	high-FANCE	0.532494	0.630579	0.499075	0.575269	0.755986	0.485237	0.434833	0.604208	0.435648	0.27195	0.5024	0.4916	0.128324	0.27348	0.387444	0.521848	0.582098	0.569711	0.599628	0.442543	0.514083	0.572397	0.59685	0.311251	0.17704	0.258802	0.580063	0.267942	0.584049	0.624805	0.383566	0.953489	0.989497
TCGA-QK-AA3J-01A-11R-A39I-07	14.6	high-FANCE	0.539964	0.559939	0.464561	0.525712	0.732217	0.466683	0.379738	0.532181	0.391853	0.267229	0.452336	0.264889	0.181727	0.20841	0.36476	0.522053	0.583273	0.565496	0.47488	0.39025	0.473956	0.567013	0.635871	0.264944	0.200624	0.293568	0.58044	0.19401	0.324536	0.608984	0.342828	0.735484	0.673718
TCGA-CR-6473-01A-11R-1873-07	14.6553	high-FANCE	0.518928	0.569673	0.456691	0.610915	0.709141	0.441089	0.345381	0.481977	0.41256	0.35767	0.522822	0.360795	0.15873	0.209558	0.407703	0.538358	0.608738	0.606296	0.485056	0.432646	0.510697	0.588438	0.601221	0.225425	0.178665	0.243061	0.585959	0.155494	0.301874	0.594023	0.380198	0.784359	0.714982
TCGA-CV-6962-01A-11R-1915-07	14.702	high-FANCE	0.423016	0.603214	0.340203	0.447546	0.731021	0.458524	0.378406	0.561016	0.384648	0.234641	0.426762	0.362824	0.0380469	0.0676446	0.399387	0.473282	0.595757	0.563665	0.462685	0.361705	0.471232	0.590657	0.638266	0.263685	0.177087	0.316331	0.573954	0.113066	0.403259	0.447796	0.162148	0.386974	0.450769
TCGA-CV-5442-01A-01R-1514-07	14.7227	high-FANCE	0.459361	0.547402	0.387536	0.437627	0.689224	0.435549	0.392393	0.507263	0.35365	0.301457	0.416262	0.34156	0.0770615	0.184646	0.352542	0.428845	0.539902	0.576401	0.468857	0.358045	0.486082	0.595096	0.640195	0.23981	0.215622	0.260068	0.61969	0.301059	0.318591	0.480554	0.244959	0.296472	0.212764
TCGA-CN-6995-01A-31R-2016-07	14.821	high-FANCE	0.669975	0.62317	0.524245	0.565548	0.797774	0.487206	0.450953	0.624183	0.473012	0.331111	0.452034	0.538905	0.189477	0.303904	0.407903	0.556288	0.606747	0.584904	0.686977	0.467642	0.597373	0.621253	0.608835	0.337103	0.196976	0.31597	0.602685	0.249258	0.648106	0.732368	0.525327	0.968782	0.757977
TCGA-CV-7407-01A-11R-2081-07	14.8805	high-FANCE	0.5863	0.644193	0.517226	0.513837	0.754679	0.441538	0.467253	0.562353	0.460213	0.309268	0.44882	0.489621	0.122171	0.303461	0.404263	0.552617	0.598469	0.618969	0.634434	0.43508	0.558597	0.583739	0.63147	0.395759	0.285427	0.293053	0.610892	0.148571	0.64698	0.735888	0.483114	0.900688	0.876338
TCGA-CR-5249-01A-01R-1514-07	14.8835	high-FANCE	0.672064	0.625929	0.558832	0.635773	0.784988	0.477716	0.469018	0.567659	0.485644	0.331964	0.483531	0.456373	0.512855	0.50357	0.456779	0.585472	0.580802	0.621114	0.662144	0.425752	0.585033	0.628957	0.638877	0.343048	0.259873	0.347312	0.65391	0.202471	0.59062	0.847702	0.68594	0.813527	0.681842
TCGA-TN-A7HL-01A-11R-A34R-07	14.9434	high-FANCE	0.791415	0.583044	0.632342	0.634328	0.783927	0.454837	0.504102	0.572793	0.516155	0.378226	0.421735	0.516253	0.387037	0.392813	0.368559	0.56029	0.608945	0.657869	0.753705	0.485568	0.587654	0.613095	0.627257	0.434641	0.271402	0.343701	0.658236	0.200684	0.748518	0.80967	0.700141	0.943503	0.806307
TCGA-CN-6021-01A-11R-1686-07	14.9867	high-FANCE	0.513661	0.628441	0.444858	0.480839	0.750567	0.440034	0.458194	0.575309	0.402986	0.318454	0.428496	0.395969	0.237844	0.277653	0.409861	0.521614	0.569818	0.581433	0.556697	0.363524	0.521388	0.643009	0.596475	0.343162	0.1856	0.333834	0.631532	0.300398	0.496252	0.649766	0.419958	0.478161	0.549104
TCGA-IQ-A61E-01A-22R-A30B-07	15.0364	high-FANCE	0.592622	0.587391	0.493021	0.602205	0.787042	0.463984	0.45182	0.581276	0.424287	0.265359	0.471011	0.466911	0.143222	0.260994	0.399117	0.540789	0.617099	0.572529	0.600592	0.452378	0.507059	0.596185	0.61286	0.298055	0.251472	0.317771	0.580405	0.325001	0.536436	0.652169	0.436648	0.935368	0.914531
TCGA-F7-A61V-01A-11R-A28V-07	15.0538	high-FANCE	0.493585	0.579668	0.424259	0.469853	0.708618	0.494726	0.413825	0.545581	0.387188	0.256027	0.453332	0.338343	0.186964	0.192346	0.361182	0.481123	0.576669	0.609851	0.51243	0.358511	0.511655	0.619307	0.594484	0.253866	0.209965	0.308512	0.574789	0.225917	0.411734	0.535132	0.333847	0.723139	0.477616
TCGA-IQ-A61I-01A-11R-A30B-07	15.0671	high-FANCE	0.636903	0.564386	0.555293	0.624801	0.725742	0.454735	0.388726	0.554921	0.440011	0.338247	0.433806	0.498792	0.25809	0.310495	0.385434	0.539199	0.577346	0.687376	0.629918	0.442839	0.504758	0.625078	0.633555	0.328073	0.159069	0.304658	0.584707	0.300302	0.547554	0.639389	0.529227	0.8588	0.923513
TCGA-BA-A6DJ-01A-11R-A30B-07	15.1083	high-FANCE	0.647568	0.593663	0.566618	0.591146	0.783043	0.467791	0.458288	0.598551	0.457094	0.346848	0.415942	0.501609	0.135773	0.308984	0.344485	0.534588	0.591456	0.557782	0.627055	0.442166	0.562528	0.626693	0.597586	0.333714	0.268685	0.371187	0.620443	0.388959	0.554434	0.695834	0.470076	0.964191	0.934977
TCGA-CV-A6JU-01A-11R-A31N-07	15.177	high-FANCE	0.494613	0.596271	0.452507	0.394131	0.716875	0.437588	0.415966	0.546307	0.390897	0.267284	0.347115	0.36014	0.1116	0.206851	0.330459	0.518549	0.588086	0.622401	0.536338	0.380581	0.496131	0.588614	0.613134	0.352379	0.183517	0.280753	0.629914	0.087869	0.518055	0.53359	0.329091	0.648314	0.804596
TCGA-D6-6827-01A-11R-1915-07	15.3455	high-FANCE	0.441361	0.59475	0.392465	0.480097	0.713951	0.425621	0.423963	0.536453	0.409268	0.217368	0.444593	0.332262	0.157768	0.228625	0.373288	0.524342	0.570038	0.570928	0.542594	0.395018	0.506228	0.613668	0.590732	0.287646	0.175911	0.319178	0.562334	0.141096	0.421729	0.632553	0.3206	0.72651	0.510689
TCGA-BA-6869-01A-11R-1873-07	15.3705	high-FANCE	0.541311	0.573575	0.477131	0.473885	0.757493	0.392476	0.414444	0.518839	0.418102	0.323135	0.401322	0.354886	0.129964	0.213774	0.348628	0.488916	0.604896	0.592273	0.509663	0.406888	0.501852	0.599806	0.61092	0.282976	0.228174	0.37012	0.608168	0.282759	0.338228	0.591531	0.332838	0.702172	0.64792
TCGA-T2-A6X2-01A-12R-A34R-07	15.5113	high-FANCE	0.60492	0.580373	0.550534	0.491828	0.77851	0.449149	0.452492	0.59047	0.43746	0.315286	0.436482	0.470824	0.141836	0.289763	0.365798	0.526284	0.576214	0.574569	0.628228	0.423441	0.537327	0.598694	0.597147	0.312813	0.200652	0.257038	0.611537	0.29204	0.566116	0.694245	0.441045	0.978843	0.915944
TCGA-BB-4225-01A-01R-1436-07	15.5402	high-FANCE	0.712009	0.540259	0.539372	0.669808	0.771685	0.454214	0.471927	0.530672	0.478413	0.289981	0.4885	0.474024	0.301049	0.365858	0.482592	0.574788	0.609343	0.627711	0.663226	0.470675	0.565548	0.617476	0.600715	0.337112	0.27676	0.427375	0.646683	0.103615	0.604225	0.763429	0.625579	0.913197	0.878621
TCGA-QK-A8Z8-01A-11R-A39I-07	15.5541	high-FANCE	0.511902	0.561547	0.480581	0.45962	0.727178	0.398199	0.362732	0.524422	0.372654	0.245877	0.377528	0.32976	0.127485	0.256711	0.293001	0.473292	0.589569	0.570067	0.454797	0.380035	0.529376	0.623935	0.61019	0.297423	0.143138	0.309231	0.567474	0.264746	0.300773	0.486337	0.274092	0.681649	0.8972
TCGA-CV-7100-01A-11R-2016-07	15.6471	high-FANCE	0.60176	0.613994	0.517748	0.569688	0.77875	0.474418	0.421994	0.563048	0.45157	0.316336	0.471695	0.509892	0.181469	0.294973	0.381387	0.571447	0.620732	0.551123	0.630025	0.440891	0.511939	0.589183	0.655286	0.302695	0.192207	0.30376	0.592228	0.112784	0.585125	0.703829	0.45913	0.978531	0.869418
TCGA-CR-7388-01A-11R-2016-07	15.7858	high-FANCE	0.553466	0.646647	0.519402	0.571736	0.797844	0.482837	0.460403	0.617886	0.47603	0.319821	0.444307	0.564289	0.327558	0.36419	0.423044	0.56978	0.568847	0.58786	0.672418	0.425453	0.553082	0.686287	0.651155	0.370115	0.253121	0.448853	0.612858	0.463777	0.643287	0.820433	0.587598	0.757826	0.647816
TCGA-CV-A45W-01A-11R-A24Z-07	15.8967	high-FANCE	0.633084	0.639311	0.522801	0.575666	0.76423	0.428564	0.480591	0.592918	0.452588	0.252602	0.361088	0.52913	0.402532	0.412377	0.383142	0.56267	0.614912	0.590755	0.694369	0.418468	0.536271	0.646515	0.600995	0.39644	0.241363	0.388933	0.618513	0.180964	0.670233	0.764564	0.577301	0.817812	0.635164
TCGA-BA-5555-01A-01R-1514-07	15.899	high-FANCE	0.537771	0.606855	0.494919	0.499375	0.754395	0.422872	0.447084	0.585303	0.421618	0.244164	0.483063	0.402106	0.198528	0.290819	0.381729	0.533007	0.600751	0.55811	0.554602	0.40502	0.522603	0.599386	0.616842	0.277842	0.145608	0.365551	0.613231	0.256572	0.488479	0.659318	0.366777	0.810366	0.832789
TCGA-CN-4731-01A-01R-1436-07	15.9016	high-FANCE	0.523464	0.600483	0.510471	0.470613	0.798471	0.456849	0.438555	0.553305	0.416566	0.292635	0.433247	0.373316	0.0903449	0.259216	0.456964	0.550083	0.592356	0.597717	0.540901	0.412137	0.53559	0.599356	0.604467	0.300034	0.147474	0.332039	0.600222	0.326715	0.441381	0.599958	0.320061	0.668494	0.739641
TCGA-P3-A5Q5-01A-11R-A28V-07	15.9036	high-FANCE	0.779881	0.60092	0.58972	0.62948	0.800354	0.463388	0.534872	0.600123	0.486194	0.320869	0.411043	0.591414	0.3169	0.441791	0.396874	0.596569	0.563231	0.663902	0.788998	0.444914	0.558214	0.621937	0.664073	0.436967	0.20822	0.355198	0.649446	0.200871	0.812336	0.880237	0.715797	0.850577	0.706433
TCGA-BA-6868-01B-12R-1915-07	15.9169	high-FANCE	0.431161	0.567089	0.36827	0.500039	0.755296	0.437123	0.39336	0.524144	0.396716	0.279122	0.427755	0.448577	0.093126	0.183061	0.363416	0.535542	0.627931	0.60655	0.468923	0.419294	0.500066	0.647798	0.600175	0.292098	0.146965	0.278764	0.594023	0.297458	0.304234	0.450863	0.287232	0.737018	0.840962
TCGA-D6-A6EO-01A-11R-A31N-07	15.9844	high-FANCE	0.454762	0.554064	0.406995	0.511422	0.741672	0.459824	0.383636	0.516062	0.369363	0.246662	0.434336	0.392291	0.128713	0.183665	0.359591	0.480474	0.581301	0.591142	0.446119	0.398995	0.494085	0.607644	0.615699	0.258763	0.189052	0.317201	0.577698	0.193603	0.325221	0.493485	0.276127	0.700914	0.958454
TCGA-BA-5559-01A-01R-1514-07	15.9873	high-FANCE	0.706293	0.630598	0.611752	0.649078	0.791975	0.527267	0.471034	0.566268	0.514751	0.317327	0.449489	0.600195	0.310107	0.391678	0.406882	0.654613	0.569367	0.61627	0.764614	0.474921	0.566177	0.630229	0.591455	0.370879	0.180984	0.389835	0.631124	0.0798886	0.754658	0.915534	0.691622	0.93963	0.746218
TCGA-CV-6937-01A-11R-2016-07	16.0639	high-FANCE	0.458716	0.613447	0.453624	0.452704	0.754739	0.419368	0.420248	0.540724	0.415398	0.305529	0.332414	0.427268	0.00738224	0.179503	0.344725	0.50609	0.613823	0.585853	0.560043	0.375399	0.532076	0.61619	0.623658	0.342285	0.20464	0.198116	0.575952	0.212172	0.505063	0.522699	0.305705	0.632115	0.66221
TCGA-CV-7102-01A-11R-2016-07	16.1446	high-FANCE	0.489977	0.679257	0.496195	0.536595	0.788218	0.519354	0.464979	0.609437	0.457775	0.280192	0.437482	0.565495	0.125819	0.262015	0.427393	0.567976	0.603393	0.598324	0.66839	0.449215	0.500662	0.610917	0.627691	0.37895	0.162435	0.360588	0.599301	0.191843	0.683196	0.726885	0.463514	0.784548	0.683142
TCGA-H7-8502-01A-11R-2403-07	16.194	high-FANCE	0.458438	0.622793	0.465048	0.588352	0.74454	0.488831	0.44206	0.571088	0.415329	0.268323	0.459611	0.474297	0.0882194	0.243468	0.415794	0.544684	0.607639	0.595485	0.568442	0.444207	0.499405	0.610357	0.614054	0.318366	0.185642	0.278013	0.599928	0.245567	0.523	0.62685	0.353353	0.844284	0.790098
TCGA-KU-A6H7-01A-11R-A31N-07	16.2662	high-FANCE	0.726963	0.591188	0.57923	0.655989	0.754338	0.475515	0.456316	0.577461	0.486218	0.328382	0.453433	0.485289	0.242789	0.321763	0.405492	0.525836	0.574039	0.641685	0.678707	0.4584	0.549694	0.598432	0.618583	0.361439	0.191908	0.310184	0.618152	0.205926	0.664557	0.752949	0.568798	0.947561	0.9374
TCGA-QK-A6VB-01A-12R-A34R-07	16.2677	high-FANCE	0.428201	0.574865	0.375722	0.41223	0.788058	0.415024	0.387772	0.562824	0.34692	0.211725	0.401348	0.344149	0.0720802	0.144172	0.319452	0.499069	0.579261	0.573696	0.442534	0.373686	0.481389	0.596587	0.636543	0.259494	0.173376	0.283664	0.579575	0.227261	0.37966	0.512162	0.199668	0.533625	0.722493
TCGA-DQ-7591-01A-11R-2081-07	16.2825	high-FANCE	0.689488	0.575793	0.531602	0.669202	0.769854	0.493203	0.406536	0.533346	0.443204	0.297612	0.473413	0.494665	0.337573	0.368632	0.427526	0.546023	0.564828	0.62598	0.6397	0.401629	0.590874	0.610864	0.571361	0.361309	0.287212	0.247859	0.614898	0.0545126	0.59564	0.808859	0.619765	0.875794	0.655747
TCGA-DQ-5630-01A-01R-1873-07	16.2921	high-FANCE	0.669076	0.637197	0.581948	0.52122	0.798867	0.48254	0.502202	0.599565	0.483584	0.344599	0.447151	0.533746	0.21954	0.318725	0.396392	0.600324	0.597948	0.594601	0.672768	0.473701	0.588169	0.632887	0.629699	0.414247	0.220904	0.336399	0.602066	0.33552	0.668334	0.778581	0.572031	0.983836	0.934471
TCGA-UF-A7JJ-01A-11R-A34R-07	16.3277	high-FANCE	0.66825	0.640908	0.5708	0.540606	0.836467	0.49671	0.513498	0.621091	0.473615	0.318251	0.40727	0.587247	0.290454	0.375321	0.392119	0.597649	0.595088	0.62126	0.730263	0.454022	0.561694	0.666237	0.637151	0.428593	0.240242	0.359127	0.616775	0.345152	0.7161	0.806428	0.624996	0.895406	0.956587
TCGA-CR-5247-01A-01R-2016-07	16.4313	high-FANCE	0.421503	0.619118	0.415575	0.399278	0.768659	0.468763	0.411438	0.56465	0.404087	0.254836	0.451279	0.394493	0.0728167	0.172073	0.434266	0.523206	0.58334	0.578891	0.416571	0.422746	0.470685	0.58975	0.598111	0.266781	0.112453	0.310109	0.596527	0.105666	0.305475	0.458026	0.213128	0.540813	0.677301
TCGA-CV-7428-01A-11R-2132-07	16.489	high-FANCE	0.605172	0.608804	0.542348	0.550598	0.778583	0.479289	0.464557	0.597689	0.435	0.294719	0.421298	0.482413	0.202581	0.310671	0.395763	0.571952	0.593595	0.607532	0.633215	0.421642	0.559113	0.595487	0.595867	0.306885	0.236879	0.341913	0.605286	0.299803	0.586253	0.685691	0.47492	0.981766	0.939591
TCGA-RS-A6TP-01A-12R-A34R-07	16.5127	high-FANCE	0.554446	0.540974	0.495413	0.553665	0.734653	0.395761	0.356999	0.579629	0.393895	0.351133	0.399847	0.36166	0.0630952	0.175663	0.385402	0.481828	0.580232	0.599807	0.514259	0.426568	0.479249	0.541676	0.595517	0.237536	0.155716	0.242155	0.602048	0.126804	0.372099	0.577685	0.311229	0.932451	0.849576
TCGA-BA-6870-01A-11R-1873-07	16.5571	high-FANCE	0.533382	0.576229	0.472401	0.53292	0.774778	0.448586	0.443967	0.585711	0.453925	0.297003	0.398403	0.444089	0.374218	0.336093	0.442873	0.530754	0.588576	0.613195	0.60655	0.411704	0.547785	0.616721	0.611076	0.33158	0.229407	0.381394	0.605458	0.353946	0.490379	0.617471	0.499746	0.632165	0.756734
TCGA-CN-A49A-01A-11R-A24H-07	16.5599	high-FANCE	0.391425	0.584046	0.388741	0.415804	0.737587	0.428654	0.382048	0.546261	0.388708	0.271246	0.482894	0.372826	0.0832275	0.0339033	0.371236	0.527024	0.60244	0.571067	0.437124	0.376056	0.441467	0.630754	0.575242	0.271388	0.173514	0.239289	0.553512	0.247438	0.277844	0.409251	0.126882	0.62608	0.572249
TCGA-CN-5367-01A-01R-1436-07	16.5892	high-FANCE	0.458447	0.605134	0.471819	0.53246	0.763379	0.436818	0.439859	0.561348	0.412857	0.244921	0.436509	0.486444	0.135396	0.273169	0.433206	0.514903	0.583816	0.592612	0.592432	0.434904	0.518203	0.588842	0.615122	0.322519	0.190306	0.25886	0.58485	0.250129	0.617421	0.631333	0.37507	0.83649	0.922779
TCGA-CV-6935-01A-11R-1915-07	16.6192	high-FANCE	0.437447	0.638287	0.410601	0.415103	0.758712	0.436256	0.427343	0.599471	0.42069	0.26117	0.40207	0.445773	0.112857	0.228687	0.373498	0.52797	0.594093	0.618378	0.530779	0.395455	0.482826	0.61742	0.59058	0.325988	0.219154	0.32445	0.592856	0.165853	0.495687	0.593299	0.285956	0.532931	0.412267
TCGA-WA-A7GZ-01A-11R-A34R-07	16.6612	high-FANCE	0.419967	0.603437	0.400009	0.480342	0.759494	0.434593	0.391544	0.570284	0.385025	0.268686	0.441751	0.349086	0.0355577	0.136877	0.413126	0.500321	0.573293	0.62518	0.475759	0.387713	0.473489	0.627079	0.576164	0.273628	0.128771	0.278073	0.593433	0.214338	0.366546	0.427897	0.256783	0.715835	0.859654
TCGA-CV-7415-01A-11R-2081-07	16.7212	high-FANCE	0.603021	0.615952	0.522949	0.528461	0.784008	0.449272	0.497439	0.576175	0.467387	0.324242	0.41243	0.473601	0.159417	0.280209	0.403285	0.5345	0.592836	0.601752	0.644369	0.443313	0.539025	0.598636	0.597262	0.355254	0.166546	0.257245	0.60338	0.249141	0.584863	0.669072	0.435882	0.971007	0.922726
TCGA-CQ-A4CA-01A-11R-A24Z-07	16.8312	high-FANCE	0.650314	0.64308	0.560988	0.531719	0.786833	0.517013	0.491441	0.610201	0.475642	0.319018	0.467056	0.528097	0.217587	0.312287	0.39192	0.592574	0.606477	0.62853	0.686939	0.44438	0.564745	0.614173	0.628081	0.364276	0.182413	0.362487	0.623336	0.247337	0.675282	0.721115	0.542901	0.976982	0.93188
TCGA-P3-A6T6-01A-11R-A34R-07	16.9322	high-FANCE	0.479306	0.547295	0.404112	0.475576	0.724638	0.40295	0.366474	0.514949	0.352629	0.26908	0.354476	0.275345	0.0503265	0.109947	0.352639	0.493208	0.586697	0.607637	0.451274	0.337996	0.431345	0.54342	0.627668	0.2138	0.16629	0.177023	0.582715	0.152828	0.274402	0.52902	0.226028	0.667143	0.585135
TCGA-CQ-A4C9-01A-11R-A24Z-07	16.9402	high-FANCE	0.460766	0.610047	0.420766	0.514011	0.757112	0.456417	0.425694	0.561011	0.400748	0.307801	0.432065	0.3882	0.159228	0.216634	0.337552	0.526447	0.583843	0.621512	0.539375	0.394684	0.483083	0.613839	0.643553	0.31803	0.203401	0.324911	0.59099	0.268113	0.470725	0.595344	0.301584	0.625808	0.858115
TCGA-DQ-5629-01A-01R-1873-07	17.0597	high-FANCE	0.421496	0.611849	0.42111	0.5034	0.713168	0.443354	0.366996	0.520693	0.392517	0.245376	0.446754	0.343692	0.163858	0.167186	0.422034	0.5062	0.588475	0.55136	0.451982	0.404363	0.477389	0.565389	0.581065	0.253385	0.131573	0.27653	0.588743	0.190246	0.34584	0.479602	0.234102	0.580967	0.658097
TCGA-IQ-A6SG-01A-12R-A34R-07	17.0881	high-FANCE	0.442648	0.599229	0.426242	0.459385	0.734527	0.406124	0.403575	0.583822	0.380332	0.264717	0.426952	0.431141	0.034027	0.145632	0.392697	0.522525	0.593798	0.583691	0.514764	0.394494	0.474966	0.634512	0.625006	0.302349	0.196076	0.283498	0.573146	0.283541	0.416629	0.515286	0.253401	0.496379	0.648762
TCGA-UF-A71A-06A-11R-A39I-07	17.2065	high-FANCE	0.399374	0.591397	0.392693	0.417444	0.696882	0.414139	0.380384	0.520752	0.352344	0.324374	0.378279	0.349275	0.0283022	0.0987444	0.39305	0.495089	0.591071	0.613974	0.432807	0.338397	0.44789	0.613264	0.594009	0.30383	0.194165	0.271844	0.5732	0.116433	0.356877	0.444347	0.169602	0.40464	0.366274
TCGA-CV-A45U-01A-12R-A24H-07	17.3201	high-FANCE	0.571138	0.565937	0.428084	0.545464	0.737778	0.408366	0.417749	0.54454	0.3978	0.27814	0.445084	0.347249	0.0915903	0.176937	0.418853	0.528241	0.616618	0.578542	0.515949	0.386069	0.498766	0.586198	0.612759	0.265994	0.226316	0.303132	0.588334	0.188653	0.406597	0.567318	0.345947	0.796905	0.75695
TCGA-CV-7235-01A-11R-2016-07	17.3357	high-FANCE	0.621802	0.659038	0.50814	0.541857	0.7732	0.508268	0.486086	0.581238	0.495726	0.320962	0.393946	0.516029	0.172992	0.306317	0.429613	0.577926	0.578478	0.595563	0.676373	0.458314	0.50386	0.602536	0.627163	0.397542	0.275961	0.360952	0.602637	0.169289	0.640181	0.741037	0.512035	0.924909	0.931763
TCGA-QK-A8Z7-01A-11R-A39I-07	17.3486	high-FANCE	0.446032	0.554157	0.374487	0.484842	0.735952	0.435939	0.403376	0.505504	0.373777	0.242493	0.295205	0.308488	0.143162	0.194549	0.32773	0.491043	0.594315	0.615765	0.515325	0.368513	0.44674	0.575662	0.536589	0.279967	0.172316	0.251561	0.572034	0.0958176	0.372878	0.519737	0.275019	0.522195	0.427618
TCGA-BA-A4II-01A-11R-A266-07	17.4246	high-FANCE	0.557108	0.599382	0.467024	0.565973	0.733115	0.45009	0.456503	0.60153	0.428026	0.341141	0.456215	0.486552	0.157887	0.256104	0.338862	0.501577	0.555687	0.59354	0.590415	0.426385	0.533625	0.62155	0.634046	0.299184	0.267915	0.333098	0.594805	0.373667	0.526592	0.679803	0.428979	0.777066	0.689928
TCGA-CR-5248-01A-01R-2016-07	17.5068	high-FANCE	0.756365	0.589197	0.593083	0.695505	0.817312	0.451886	0.490538	0.59465	0.519669	0.31921	0.453798	0.57356	0.45176	0.46919	0.415827	0.573165	0.569021	0.613418	0.775561	0.49335	0.557316	0.621115	0.606764	0.376206	0.215295	0.34515	0.638931	0.194003	0.730542	0.917658	0.757009	0.86113	0.6532
TCGA-CN-5360-01A-01R-1436-07	17.532	high-FANCE	0.62925	0.648105	0.578516	0.559915	0.784739	0.471151	0.520948	0.602314	0.490126	0.303283	0.442641	0.547	0.276201	0.370975	0.398615	0.627904	0.582637	0.603596	0.732583	0.446424	0.571355	0.668253	0.621371	0.369112	0.207065	0.375091	0.626164	0.268533	0.700237	0.860689	0.637886	0.907351	0.786622
TCGA-CN-5356-01A-01R-1436-07	17.5615	high-FANCE	0.486937	0.623527	0.461662	0.493885	0.7617	0.43846	0.470162	0.555925	0.422601	0.314735	0.420632	0.405402	0.186514	0.253741	0.381879	0.541768	0.576163	0.588103	0.558899	0.401556	0.520325	0.606673	0.604871	0.271174	0.176884	0.301795	0.593364	0.203983	0.473824	0.631228	0.382763	0.543365	0.569832
TCGA-CN-4727-01A-01R-1436-07	17.836	high-FANCE	0.425813	0.58617	0.391136	0.509218	0.729542	0.479017	0.372897	0.552989	0.406185	0.324404	0.436443	0.380515	0.0825144	0.135582	0.372418	0.522594	0.563828	0.580226	0.466318	0.388414	0.498625	0.577361	0.633432	0.268695	0.195121	0.312832	0.605192	0.254956	0.339575	0.500673	0.274836	0.509933	0.563159
TCGA-F7-8298-01A-11R-2403-07	18.0388	high-FANCE	0.487778	0.621304	0.443958	0.564789	0.767554	0.468137	0.442681	0.603391	0.436899	0.269738	0.469953	0.500043	0.114022	0.219702	0.402951	0.54839	0.602777	0.625194	0.582977	0.47471	0.517222	0.599309	0.620319	0.28393	0.166735	0.317102	0.606801	0.202592	0.514747	0.594239	0.347049	0.722491	0.667138
TCGA-F7-7848-01A-11R-2132-07	18.0927	high-FANCE	0.577006	0.640686	0.504705	0.561239	0.77037	0.455399	0.45549	0.582877	0.447861	0.318513	0.441782	0.445389	0.265543	0.337057	0.354634	0.541918	0.543441	0.576165	0.600578	0.400695	0.519592	0.624223	0.652511	0.324391	0.21107	0.364729	0.615796	0.321276	0.56265	0.763378	0.528791	0.568211	0.592184
TCGA-CV-7568-01A-11R-2232-07	18.097	high-FANCE	0.490138	0.64246	0.466975	0.505086	0.754896	0.473717	0.398441	0.557613	0.409886	0.292652	0.475983	0.422545	0.105859	0.233664	0.4188	0.523244	0.590763	0.58822	0.510114	0.410239	0.470964	0.61594	0.608668	0.272715	0.226038	0.353463	0.575239	0.306739	0.42692	0.605596	0.30677	0.841416	0.773759
TCGA-CQ-5323-01A-01R-1686-07	18.1518	high-FANCE	0.537563	0.611935	0.495951	0.557091	0.738252	0.440926	0.436028	0.57659	0.437681	0.335756	0.476084	0.394364	0.216201	0.274873	0.349671	0.537699	0.56913	0.576159	0.568241	0.402635	0.533889	0.611404	0.591167	0.288291	0.189065	0.347747	0.591083	0.376124	0.483025	0.641623	0.427173	0.897326	0.878094
TCGA-CV-7261-01A-11R-2016-07	18.1761	high-FANCE	0.456604	0.636834	0.450685	0.530993	0.765586	0.455809	0.400562	0.576358	0.415067	0.253887	0.450565	0.468254	0.123371	0.253535	0.411867	0.538166	0.604203	0.56651	0.550781	0.416657	0.479967	0.634449	0.601181	0.334243	0.208157	0.400311	0.577218	0.17198	0.522496	0.674711	0.338339	0.739029	0.599378
TCGA-BA-A4IF-01A-11R-A266-07	18.2274	high-FANCE	0.438151	0.561577	0.363393	0.467128	0.755733	0.462391	0.417501	0.540323	0.365435	0.249823	0.450529	0.322058	0.147022	0.157104	0.340669	0.475562	0.601642	0.574546	0.435009	0.374529	0.478231	0.585517	0.612497	0.219228	0.142114	0.210497	0.575364	0.211222	0.298226	0.459388	0.202673	0.661869	0.911355
TCGA-QK-A8ZB-01A-11R-A39I-07	18.3507	high-FANCE	0.435458	0.613458	0.467599	0.457809	0.764724	0.464854	0.435002	0.598759	0.42565	0.287749	0.443501	0.413033	0.204938	0.275349	0.372141	0.533682	0.589442	0.623573	0.533392	0.397642	0.502903	0.670276	0.613213	0.302858	0.266581	0.376695	0.57221	0.375684	0.454446	0.591257	0.331802	0.707407	0.705226
TCGA-BA-A8YP-01A-11R-A39I-07	18.3787	high-FANCE	0.421155	0.636721	0.439902	0.504388	0.778732	0.427722	0.406629	0.553883	0.390725	0.203834	0.409355	0.462967	0.128631	0.187161	0.400184	0.559696	0.585591	0.548427	0.535547	0.413107	0.469559	0.600849	0.608926	0.304505	0.238935	0.369807	0.568627	0.0530896	0.537634	0.60881	0.28073	0.59516	0.714908
TCGA-UF-A71D-01A-12R-A34R-07	18.4316	high-FANCE	0.511649	0.589551	0.437943	0.479844	0.733343	0.445751	0.423886	0.536267	0.391881	0.338376	0.40905	0.333851	0.178331	0.268178	0.373234	0.479027	0.559312	0.584696	0.487301	0.345087	0.484083	0.5863	0.607989	0.267409	0.172464	0.302724	0.59936	0.255855	0.358425	0.565167	0.33068	0.621767	0.765448
TCGA-T3-A92M-01A-31R-A39I-07	18.474	high-FANCE	0.609789	0.618839	0.506901	0.561627	0.801868	0.430738	0.441644	0.590058	0.452391	0.289905	0.436372	0.508447	0.218204	0.309493	0.384289	0.562526	0.580993	0.59037	0.648092	0.44083	0.537333	0.620585	0.604801	0.361716	0.182482	0.277352	0.602531	0.199733	0.610242	0.716864	0.488881	0.91503	0.885344
TCGA-CR-6487-01A-11R-1873-07	18.7153	high-FANCE	0.775538	0.602835	0.622082	0.742812	0.803869	0.494936	0.521392	0.587025	0.526176	0.2676	0.464523	0.588507	0.441685	0.519376	0.458079	0.611366	0.58801	0.533872	0.747088	0.463199	0.558241	0.635815	0.632263	0.417428	0.290898	0.441195	0.632824	0.109791	0.773454	0.937521	0.758002	0.948995	0.880493
TCGA-CR-7404-01A-11R-2132-07	18.7414	high-FANCE	0.648711	0.628204	0.525051	0.630753	0.779828	0.476708	0.452577	0.596214	0.444444	0.312646	0.435274	0.505928	0.333191	0.383206	0.395678	0.572511	0.563317	0.624233	0.686302	0.41991	0.528218	0.637713	0.609219	0.342253	0.190915	0.389279	0.622375	0.175888	0.618498	0.80319	0.599543	0.892233	0.841974
TCGA-CR-5250-01A-01R-1514-07	18.8629	high-FANCE	0.56858	0.572849	0.492098	0.587845	0.773096	0.455793	0.41192	0.504221	0.486699	0.354174	0.450544	0.414838	0.336433	0.342096	0.40584	0.596927	0.599595	0.636594	0.595253	0.436378	0.521781	0.643271	0.613827	0.318405	0.23027	0.360947	0.623258	0.130274	0.470113	0.709561	0.552598	0.760442	0.484372
TCGA-BB-4227-01A-01R-1873-07	18.9835	high-FANCE	0.426386	0.639444	0.393679	0.556598	0.759395	0.422031	0.419863	0.617897	0.386111	0.265714	0.438438	0.449628	0.0866223	0.172887	0.378468	0.48714	0.614146	0.576103	0.524644	0.399769	0.499169	0.60831	0.641894	0.327009	0.19283	0.359729	0.602089	0.32652	0.455188	0.580313	0.236345	0.442689	0.547623
TCGA-BB-A6UM-01A-12R-A34R-07	19.0077	high-FANCE	0.678475	0.561084	0.552835	0.609007	0.75365	0.459967	0.414393	0.576386	0.415426	0.327253	0.439906	0.389912	0.169743	0.263814	0.341431	0.506224	0.604687	0.523016	0.576962	0.414651	0.532422	0.593527	0.60931	0.272986	0.20311	0.27477	0.593383	0.222091	0.498982	0.665554	0.470069	0.954706	0.918755
TCGA-CV-5430-01A-02R-1686-07	19.0617	high-FANCE	0.563985	0.599979	0.515837	0.569617	0.769648	0.439297	0.454169	0.581984	0.421994	0.276371	0.382854	0.424257	0.211564	0.336667	0.42683	0.576774	0.564149	0.670611	0.618427	0.361084	0.56166	0.602112	0.607105	0.353838	0.209611	0.303533	0.618943	0.199606	0.600023	0.755207	0.505151	0.8942	0.801617
TCGA-CV-6433-01A-11R-1686-07	19.0835	high-FANCE	0.717206	0.557978	0.572144	0.719493	0.795589	0.54702	0.444668	0.551877	0.48713	0.363554	0.481742	0.484099	0.274914	0.347557	0.367773	0.572507	0.606607	0.519892	0.72233	0.475038	0.564195	0.595223	0.60526	0.340445	0.199413	0.345597	0.625995	0.11722	0.668631	0.825375	0.645066	0.919297	0.752897
TCGA-CV-6939-01A-11R-1915-07	19.0875	high-FANCE	0.594867	0.594607	0.53563	0.609026	0.779252	0.520861	0.42845	0.556934	0.499568	0.302973	0.491195	0.499041	0.279625	0.331756	0.392548	0.587805	0.591176	0.589089	0.636129	0.458477	0.536771	0.649553	0.659318	0.336045	0.282858	0.380175	0.599686	0.193387	0.594307	0.785027	0.533686	0.886256	0.68162
TCGA-P3-A6SX-01A-11R-A34R-07	19.1711	high-FANCE	0.446782	0.589009	0.363673	0.46362	0.719234	0.39507	0.40849	0.553452	0.359483	0.279633	0.405253	0.312862	0.0449362	0.161351	0.345751	0.509013	0.615646	0.618878	0.483283	0.390948	0.437129	0.61456	0.58184	0.226768	0.171997	0.24004	0.586157	0.246447	0.28096	0.389865	0.206466	0.562767	0.65727
TCGA-CQ-6228-01A-11R-1915-07	19.29	high-FANCE	0.438078	0.598411	0.411515	0.532348	0.731987	0.460442	0.423504	0.538892	0.40891	0.269296	0.398333	0.401924	0.207992	0.278752	0.321612	0.511784	0.58437	0.59502	0.539576	0.407207	0.496076	0.59359	0.62117	0.317406	0.193095	0.340107	0.566522	0.209393	0.475993	0.5955	0.299666	0.598803	0.769869
TCGA-CN-6992-01A-11R-1915-07	19.5905	high-FANCE	0.450066	0.630851	0.427151	0.465219	0.758616	0.445315	0.43661	0.553484	0.404842	0.262618	0.373221	0.415804	0.0893785	0.209088	0.418526	0.529403	0.594089	0.610726	0.543344	0.384244	0.497717	0.615991	0.576653	0.322523	0.140104	0.285607	0.588708	0.0786968	0.513944	0.625067	0.35282	0.56586	0.494195
TCGA-CQ-A4CI-01A-11R-A266-07	19.6204	high-FANCE	0.432432	0.579561	0.390535	0.526856	0.70683	0.47813	0.366216	0.513087	0.378337	0.227699	0.440074	0.334497	0.0675147	0.111368	0.41948	0.48947	0.585448	0.593097	0.436605	0.3934	0.44577	0.578992	0.590164	0.289989	0.151818	0.272569	0.582199	0.124049	0.356843	0.447033	0.198323	0.434367	0.426593
TCGA-CN-A498-01A-11R-A24H-07	19.9738	high-FANCE	0.503917	0.602474	0.490899	0.536851	0.739041	0.422607	0.425148	0.586259	0.4225	0.301406	0.460971	0.426057	0.209658	0.276707	0.381294	0.488528	0.569824	0.643892	0.533459	0.413332	0.496175	0.633175	0.605424	0.307057	0.255875	0.338146	0.602589	0.338576	0.449753	0.607285	0.365231	0.906839	0.755713
TCGA-BB-8601-01A-11R-2403-07	19.991	high-FANCE	0.41957	0.560243	0.350421	0.470584	0.65833	0.456755	0.411638	0.532315	0.370427	0.299311	0.457419	0.275282	0.0803121	0.140898	0.383863	0.40394	0.585754	0.553178	0.408927	0.359539	0.402295	0.580779	0.596553	0.226302	0.162633	0.336218	0.577281	0.168172	0.244232	0.365539	0.157097	0.308232	0.118171
TCGA-KU-A66T-01A-11R-A30B-07	19.9976	high-FANCE	0.403458	0.578214	0.346205	0.510588	0.724942	0.430543	0.394494	0.566611	0.382172	0.27106	0.466272	0.367573	0.0996331	0.132769	0.420076	0.483129	0.586498	0.626974	0.436928	0.403822	0.519156	0.606547	0.606632	0.243215	0.151692	0.304984	0.580399	0.305414	0.304155	0.384425	0.227362	0.565785	0.634812
TCGA-P3-A5QF-01A-11R-A28V-07	20.1192	high-FANCE	0.537138	0.571965	0.484506	0.566707	0.737762	0.462109	0.425253	0.577344	0.395168	0.279791	0.478898	0.376409	0.0993834	0.217248	0.347561	0.495342	0.584593	0.582614	0.548204	0.389345	0.494358	0.584727	0.637222	0.323497	0.205966	0.338596	0.593477	0.294863	0.526927	0.631013	0.353375	0.839633	0.868696
TCGA-UF-A71E-01A-31R-A34R-07	20.21	high-FANCE	0.44448	0.559459	0.434201	0.489127	0.717288	0.460125	0.382399	0.552475	0.370314	0.319101	0.395401	0.332812	0.14414	0.129715	0.355797	0.50736	0.563345	0.58299	0.460095	0.369418	0.474247	0.603059	0.60461	0.30302	0.196676	0.292827	0.562481	0.313436	0.37106	0.442228	0.234413	0.542718	0.888111
TCGA-CR-6480-01A-11R-1873-07	20.2285	high-FANCE	0.549018	0.561053	0.518544	0.563176	0.747031	0.44042	0.420587	0.545618	0.394868	0.374055	0.423784	0.353268	0.167148	0.278625	0.35047	0.530232	0.540376	0.544442	0.531209	0.381023	0.559112	0.600664	0.632249	0.29176	0.219424	0.284503	0.599771	0.240266	0.419699	0.697445	0.405542	0.821745	0.781499
TCGA-CN-4741-01A-01R-1436-07	20.4654	high-FANCE	0.491758	0.582136	0.469964	0.50452	0.731566	0.456731	0.412264	0.559757	0.406655	0.336357	0.460395	0.347674	0.0818189	0.193572	0.379863	0.541995	0.579708	0.571922	0.539196	0.390602	0.517553	0.604086	0.621265	0.317606	0.227791	0.315444	0.578725	0.316252	0.484151	0.578516	0.325917	0.783192	0.697185
TCGA-CV-6954-01A-11R-1915-07	20.5665	high-FANCE	0.495205	0.616379	0.505209	0.50183	0.773645	0.437789	0.490122	0.586562	0.43123	0.328534	0.496737	0.430307	0.140226	0.28457	0.374176	0.553353	0.61937	0.589319	0.595997	0.423846	0.505591	0.600445	0.622238	0.334224	0.205065	0.289774	0.581718	0.298605	0.585705	0.671092	0.37504	0.958288	0.906065
TCGA-CR-5243-01A-01R-1514-07	20.6294	high-FANCE	0.595307	0.616965	0.519216	0.582861	0.762043	0.457321	0.443462	0.534029	0.485092	0.28924	0.482342	0.449626	0.25153	0.311402	0.41041	0.56983	0.583073	0.605881	0.604257	0.455845	0.545887	0.611013	0.597813	0.306437	0.146912	0.33217	0.606228	0.149567	0.474458	0.729631	0.524549	0.851397	0.748673
TCGA-UF-A7JA-01A-12R-A34R-07	20.638	high-FANCE	0.43861	0.59119	0.408925	0.399135	0.76331	0.433125	0.381933	0.578629	0.392958	0.266495	0.38392	0.430437	0.0219786	0.0985779	0.345974	0.51529	0.560717	0.61062	0.447503	0.39858	0.491263	0.621868	0.601138	0.286797	0.173948	0.251567	0.577852	0.221718	0.351657	0.518575	0.194515	0.67699	0.55308
TCGA-CV-6956-01A-21R-2016-07	20.6906	high-FANCE	0.379292	0.573155	0.357495	0.443328	0.742144	0.444337	0.380485	0.540247	0.3596	0.281971	0.429807	0.299071	0.00991335	0.137243	0.402608	0.503692	0.577687	0.630857	0.409682	0.395839	0.442472	0.604061	0.588134	0.194431	0.152281	0.198099	0.594739	0.247054	0.210209	0.316091	0.158909	0.559233	0.7739
TCGA-QK-A6V9-01A-11R-A34R-07	20.8512	high-FANCE	0.674071	0.527651	0.558204	0.655306	0.731773	0.465711	0.421694	0.54875	0.445983	0.277423	0.464219	0.36251	0.306735	0.33086	0.39495	0.517461	0.578385	0.584872	0.611497	0.424707	0.555602	0.601652	0.606471	0.311812	0.245209	0.254039	0.5974	0.168041	0.485805	0.706583	0.520231	0.95077	0.672828
TCGA-P3-A5QE-01A-11R-A28V-07	20.9203	high-FANCE	0.700211	0.519246	0.542325	0.714395	0.776921	0.46349	0.410409	0.518383	0.447591	0.308233	0.443474	0.39815	0.25422	0.348059	0.440504	0.525781	0.594236	0.589402	0.628734	0.396175	0.555821	0.615309	0.604938	0.268649	0.241774	0.25605	0.596107	0.187546	0.490007	0.784062	0.657812	0.955286	0.874387
TCGA-CV-5441-01A-01R-1514-07	21.1766	high-FANCE	0.574346	0.580004	0.45872	0.479097	0.766403	0.434952	0.432054	0.567544	0.408853	0.27581	0.378115	0.412366	0.135518	0.215237	0.344273	0.514167	0.598834	0.600834	0.550104	0.377696	0.480948	0.614159	0.602949	0.258099	0.262408	0.287383	0.628902	0.270258	0.416835	0.555297	0.372162	0.676485	0.614264
TCGA-CR-7385-01A-11R-2016-07	21.3514	high-FANCE	0.66543	0.609948	0.5747	0.708199	0.76191	0.498341	0.459324	0.574434	0.4607	0.349885	0.49608	0.491076	0.326792	0.39378	0.410883	0.557803	0.582806	0.566821	0.692179	0.43349	0.58032	0.612521	0.648363	0.398939	0.279006	0.312594	0.641318	0.305525	0.651799	0.829691	0.640527	0.85665	0.811031
TCGA-CR-7370-01A-11R-2132-07	21.382	high-FANCE	0.487342	0.626192	0.455998	0.481448	0.736107	0.457171	0.434983	0.558936	0.39007	0.252726	0.457965	0.389657	0.115745	0.22429	0.399509	0.531656	0.585947	0.557622	0.539347	0.409647	0.50256	0.609255	0.593317	0.3112	0.198682	0.332918	0.588278	0.0940832	0.487574	0.663305	0.349105	0.803809	0.632985
TCGA-CN-6012-01A-11R-1686-07	21.6397	high-FANCE	0.572831	0.623428	0.505699	0.538196	0.766867	0.438121	0.448941	0.601578	0.446174	0.280257	0.377441	0.486477	0.257355	0.305612	0.362899	0.562167	0.599505	0.603381	0.646597	0.391692	0.528428	0.631851	0.627962	0.355587	0.192376	0.276352	0.599538	0.263634	0.615147	0.755186	0.494129	0.837626	0.825117
TCGA-BA-4076-01A-01R-1436-07	21.688	high-FANCE	0.454318	0.557453	0.400914	0.488301	0.749691	0.446615	0.426521	0.592346	0.404959	0.32048	0.424342	0.405826	0.062748	0.166954	0.362787	0.508573	0.619109	0.604872	0.467076	0.379529	0.525226	0.619447	0.578147	0.25415	0.187494	0.296139	0.606026	0.304497	0.344043	0.480817	0.258667	0.582503	0.430279
TCGA-CV-5435-01A-01R-1686-07	21.7368	high-FANCE	0.423812	0.573375	0.419084	0.407394	0.733938	0.457457	0.395261	0.508201	0.367669	0.275872	0.46905	0.384101	0.0919477	0.157475	0.399779	0.547398	0.590823	0.608579	0.445387	0.411194	0.490592	0.599326	0.649765	0.295712	0.226711	0.325817	0.581948	0.0856679	0.400813	0.486641	0.228097	0.577808	0.58781
TCGA-CR-7374-01A-11R-2016-07	21.8743	high-FANCE	0.518753	0.638458	0.447887	0.549697	0.774683	0.440471	0.41161	0.55968	0.406085	0.260318	0.454973	0.402432	0.263326	0.283452	0.428892	0.513601	0.594851	0.582575	0.532775	0.366337	0.48332	0.619158	0.58233	0.306519	0.264949	0.330483	0.611684	0.205073	0.455377	0.643812	0.459591	0.623365	0.737039
TCGA-CR-6467-01A-11R-1873-07	22.2281	high-FANCE	0.716862	0.574534	0.536637	0.722667	0.784402	0.475001	0.451922	0.546734	0.471375	0.30598	0.481464	0.496913	0.420357	0.441525	0.412692	0.576805	0.569883	0.630113	0.693927	0.430129	0.545473	0.605637	0.55592	0.344289	0.239004	0.307029	0.619322	0.0803015	0.612686	0.832424	0.696177	0.854205	0.606047
TCGA-IQ-A61G-01A-11R-A30B-07	22.3892	high-FANCE	0.475522	0.54616	0.424308	0.528707	0.71074	0.492599	0.361526	0.546281	0.381767	0.29518	0.429576	0.364561	0.0253815	0.162041	0.38876	0.458961	0.597276	0.585895	0.501527	0.411187	0.530483	0.555482	0.61861	0.271847	0.199266	0.245391	0.590332	0.220753	0.446073	0.513084	0.275243	0.74569	0.779681
TCGA-CV-6933-01A-11R-1915-07	22.6378	high-FANCE	0.474106	0.644501	0.483455	0.471988	0.807305	0.458519	0.499617	0.635138	0.443783	0.282321	0.451194	0.582993	0.117773	0.265364	0.356821	0.544588	0.600068	0.617182	0.686671	0.458579	0.560012	0.608792	0.63206	0.417702	0.177013	0.370652	0.604444	0.28183	0.722175	0.748758	0.432552	0.657478	0.729352
TCGA-BA-5153-01A-01R-1436-07	23.5122	high-FANCE	0.662568	0.602332	0.552842	0.658343	0.762987	0.427944	0.436814	0.539609	0.485486	0.350468	0.467331	0.472626	0.300459	0.349655	0.414804	0.581494	0.57756	0.573161	0.658116	0.470016	0.562991	0.609131	0.608333	0.284923	0.270599	0.348893	0.607105	0.139818	0.530206	0.799	0.606045	0.800782	0.647222
TCGA-CN-A49C-01A-11R-A24H-07	23.5503	high-FANCE	0.542885	0.574512	0.493395	0.549896	0.719841	0.456485	0.416637	0.55351	0.423829	0.359137	0.482864	0.366562	0.182244	0.256754	0.380502	0.516561	0.58675	0.587877	0.544913	0.406013	0.525923	0.58454	0.621167	0.344075	0.136242	0.247553	0.604499	0.308742	0.487036	0.579107	0.379594	0.75424	0.879349
TCGA-CR-6470-01A-11R-1873-07	23.7579	high-FANCE	0.696864	0.605362	0.569894	0.648167	0.80102	0.484426	0.456333	0.556011	0.519365	0.311645	0.480586	0.49884	0.499798	0.466141	0.436666	0.626737	0.587206	0.55907	0.692332	0.445524	0.584146	0.609671	0.601608	0.3705	0.254691	0.35938	0.642047	0.121352	0.623936	0.869022	0.711218	0.912696	0.726363
TCGA-CR-7368-01A-11R-2132-07	23.9402	high-FANCE	0.547178	0.610093	0.529682	0.584591	0.757852	0.437135	0.449142	0.59664	0.434558	0.305628	0.484061	0.458347	0.193584	0.311012	0.383012	0.559118	0.564304	0.581071	0.604395	0.40577	0.543002	0.613583	0.636482	0.324418	0.248546	0.392201	0.601683	0.297879	0.549356	0.742725	0.465229	0.828333	0.882876
TCGA-BA-4078-01A-01R-1436-07	24.1947	high-FANCE	0.473858	0.60728	0.451662	0.524427	0.732303	0.505935	0.444468	0.561876	0.431261	0.271819	0.423919	0.457854	0.130017	0.243056	0.450148	0.545889	0.599506	0.552542	0.579568	0.411012	0.528429	0.646598	0.593791	0.334647	0.219534	0.308652	0.58234	0.0592131	0.567991	0.683182	0.402551	0.7414	0.632305
TCGA-CR-7402-01A-11R-2016-07	25.6844	high-FANCE	0.513077	0.582188	0.485499	0.505447	0.752383	0.422143	0.421151	0.535574	0.445277	0.295061	0.447946	0.378726	0.2269	0.311219	0.419088	0.546784	0.606102	0.576634	0.552017	0.410729	0.503989	0.645099	0.633418	0.257924	0.19397	0.310336	0.589592	0.229442	0.432146	0.65479	0.398245	0.6807	0.662639
TCGA-CN-A641-01A-11R-A30B-07	25.9788	high-FANCE	0.470715	0.584906	0.442902	0.487511	0.745459	0.447571	0.453674	0.549862	0.371253	0.284855	0.429021	0.345124	0.129161	0.193373	0.350316	0.482374	0.569471	0.582128	0.49035	0.359884	0.513346	0.620497	0.59807	0.255717	0.195833	0.328227	0.5673	0.362624	0.423405	0.511793	0.290042	0.538937	0.623008
TCGA-CN-A6UY-01A-12R-A34R-07	26.1136	high-FANCE	0.723437	0.570053	0.543052	0.602719	0.755005	0.435991	0.453402	0.536128	0.484087	0.352489	0.445721	0.489192	0.279506	0.328088	0.421017	0.551107	0.578363	0.621068	0.665154	0.465264	0.573697	0.560238	0.59177	0.331322	0.178544	0.304734	0.625953	0.171033	0.602861	0.67597	0.604545	0.832889	0.749
TCGA-BB-4223-01A-01R-1436-07	26.1668	high-FANCE	0.659856	0.577054	0.510416	0.675607	0.77994	0.47235	0.418645	0.529536	0.485873	0.28416	0.454255	0.450179	0.368782	0.400676	0.422741	0.562673	0.573161	0.630054	0.662686	0.444371	0.520074	0.603722	0.601535	0.284406	0.228616	0.294965	0.641061	0.0489619	0.562554	0.801577	0.624712	0.844247	0.678366
TCGA-D6-A4ZB-01A-11R-A24Z-07	27.3676	high-FANCE	0.491007	0.565987	0.44776	0.469282	0.747881	0.457298	0.408209	0.591288	0.423464	0.297501	0.399062	0.405053	0.186191	0.201993	0.353243	0.501084	0.594306	0.632626	0.550787	0.419965	0.515836	0.644178	0.608905	0.289574	0.196158	0.275702	0.575458	0.430304	0.454296	0.520161	0.341215	0.688485	0.679093
TCGA-CV-5440-01A-01R-1514-07	28.3845	high-FANCE	0.429948	0.617088	0.401883	0.370156	0.713313	0.443825	0.386546	0.556366	0.385299	0.266477	0.399065	0.334051	0.0543787	0.168957	0.357376	0.520477	0.578075	0.61365	0.468208	0.419214	0.489361	0.601591	0.613665	0.298423	0.141148	0.245938	0.588365	0.206031	0.392261	0.5004	0.207918	0.786705	0.612559
TCGA-BB-4228-01A-01R-1436-07	28.823	high-FANCE	0.54009	0.594065	0.478329	0.615383	0.734929	0.450753	0.427593	0.52415	0.449952	0.301281	0.433859	0.458729	0.169452	0.275105	0.448714	0.545071	0.585388	0.659868	0.609853	0.43759	0.548627	0.579264	0.620386	0.273078	0.240062	0.403565	0.606922	0.100557	0.521482	0.641561	0.438142	0.73535	0.369541
TCGA-HD-7754-01A-11R-2081-07	29.1549	high-FANCE	0.444288	0.636339	0.463232	0.525137	0.769323	0.471883	0.452101	0.571085	0.40788	0.302775	0.456849	0.471392	0.092578	0.265926	0.389537	0.567543	0.549987	0.549809	0.582767	0.379644	0.506274	0.629871	0.683335	0.377483	0.278716	0.392192	0.608809	0.217651	0.555675	0.688101	0.365334	0.423092	0.432879
TCGA-QK-A8ZA-01A-11R-A39I-07	30.3928	high-FANCE	0.424236	0.605089	0.39645	0.447085	0.68609	0.41775	0.385168	0.541266	0.367026	0.255998	0.43399	0.367097	0.0356694	0.134258	0.364073	0.497703	0.596781	0.628151	0.448471	0.381366	0.475155	0.601407	0.645267	0.247277	0.160262	0.247622	0.570225	0.230802	0.363369	0.46603	0.224368	0.688076	0.751006
TCGA-BB-4224-01A-01R-1436-07	30.5572	high-FANCE	0.446684	0.569585	0.384695	0.500431	0.725677	0.448045	0.455503	0.558998	0.370605	0.262532	0.480754	0.377884	0.0958916	0.162312	0.411177	0.446621	0.57992	0.556902	0.483952	0.360139	0.507598	0.576731	0.616865	0.265995	0.228524	0.223762	0.56599	0.276843	0.475661	0.532741	0.231736	0.729096	0.777774
TCGA-KU-A6H7-06A-21R-A31N-07	30.9665	high-FANCE	0.689855	0.535419	0.55237	0.590181	0.708617	0.423726	0.441688	0.54092	0.465543	0.299661	0.404728	0.437075	0.309917	0.31801	0.407872	0.499105	0.581171	0.685617	0.651924	0.430211	0.53401	0.573078	0.574685	0.352749	0.197945	0.327186	0.634818	0.190098	0.58923	0.62493	0.558654	0.806058	0.483694
TCGA-CN-6011-01A-11R-1686-07	31.4461	high-FANCE	0.52361	0.583957	0.459199	0.420044	0.760223	0.42499	0.456918	0.604505	0.409069	0.291376	0.395453	0.426112	0.0775251	0.229565	0.338953	0.543054	0.591426	0.583989	0.593155	0.436163	0.477188	0.60576	0.613324	0.278022	0.166175	0.26682	0.624186	0.300849	0.536879	0.593839	0.398296	0.883124	0.972707
TCGA-UF-A719-01A-12R-A34R-07	34.5081	high-FANCE	0.495464	0.557708	0.458791	0.521059	0.717274	0.462484	0.401813	0.507044	0.398574	0.297696	0.433382	0.283815	0.0899371	0.221297	0.363255	0.490528	0.561384	0.577069	0.471706	0.40274	0.516194	0.583298	0.613369	0.279241	0.138448	0.283593	0.587215	0.398489	0.404243	0.592375	0.321081	0.737973	0.9662
TCGA-T2-A6X0-01A-11R-A34R-07	40.4501	high-FANCE	0.604473	0.572439	0.476979	0.637444	0.760495	0.419813	0.435267	0.545192	0.418209	0.276298	0.451654	0.398517	0.22664	0.310706	0.363469	0.523594	0.602287	0.551198	0.6036	0.406374	0.537107	0.598455	0.633335	0.342989	0.233652	0.317936	0.576133	0.0708797	0.551455	0.68978	0.484282	0.823533	0.7668
TCGA-F7-A50I-01A-11R-A28V-07	46.5271	high-FANCE	0.533436	0.585738	0.495527	0.526672	0.761167	0.44104	0.427387	0.553617	0.427569	0.330313	0.429638	0.425358	0.148009	0.227904	0.362545	0.546545	0.606032	0.634076	0.545357	0.423932	0.553166	0.656534	0.629704	0.314241	0.284174	0.365659	0.598636	0.328125	0.480139	0.634167	0.381112	0.89421	0.759024
TCGA-P3-A6SW-01A-11R-A34R-07	53.9554	high-FANCE	0.668936	0.581404	0.548415	0.615565	0.743817	0.448383	0.450838	0.574661	0.440426	0.279682	0.406185	0.426516	0.290162	0.333198	0.359735	0.521096	0.579076	0.61183	0.654824	0.433137	0.524627	0.589119	0.598018	0.378928	0.191462	0.305303	0.573989	0.169259	0.604194	0.710491	0.546383	0.818957	0.786951
