# Supplementary material for: Comprehensive analysis of macrophage-related multigene signature in the tumor microenvironment of head and neck squamous cancer
Source: Aging (Albany NY). 2021 Feb 11;13(4):5718–47. doi: 10.18632/aging.202499 (PMC7950226; doi:10.18632/aging.202499)
Supplement: Supplementary Table 7 [file aging-13-202499-s006.xlsx]

## Sheet: checkgene
Supplementary Table 7. Expression data for FANCE and immune checkpoint marker genes in HNSC.
id	CD274	CTLA4	HAVCR2	LAG3	PDCD1	PDCD1LG2	TIGIT	FANCE
TCGA-CV-7177-11A-01R-2016-07	3.27109	1.39358	1.96659	2.03096	1.3224	3.69076	1.18657	4.4701
TCGA-HD-8635-11A-01R-2403-07	4.09527	2.56209	2.4936	2.17506	3.01874	2.02163	1.88665	3.95979
TCGA-CV-6943-11A-01R-1915-07	3.02785	1.31044	2.32569	1.91899	1.82686	1.28066	1.28974	3.80055
TCGA-CV-7250-11A-01R-2016-07	4.10871	1.99297	2.66829	2.38538	2.37015	2.35488	1.84278	3.87118
TCGA-CV-7438-11A-01R-2132-07	2.00702	1.51242	2.63575	2.22388	2.26959	1.95168	2.17316	4.32007
TCGA-WA-A7GZ-11A-11R-A34R-07	1.99877	0.611097	1.35404	1.17486	0.953093	1.34202	0.694586	3.80799
TCGA-CV-6959-11A-01R-1915-07	3.34305	1.48221	2.4182	2.30922	2.25852	1.94401	2.07922	4.07012
TCGA-CV-7238-11A-01R-2016-07	2.11817	0.75315	2.02054	1.0926	1.25932	1.83118	0.728978	3.03786
TCGA-CV-7423-11A-01R-2081-07	2.38003	1.66977	2.32911	2.20516	1.98057	1.28552	1.98673	3.85987
TCGA-H7-A6C5-11A-11R-A30B-07	1.87264	1.739	1.95413	1.13769	1.70647	1.47331	1.21052	3.49872
TCGA-CV-7242-11A-01R-2016-07	2.10589	1.53493	2.52616	1.48137	1.72829	1.6004	1.14064	3.85655
TCGA-CV-7440-11A-01R-2187-07	2.08758	1.82902	1.9664	1.28271	1.28954	1.27073	1.31727	4.32728
TCGA-CV-6961-11A-01R-1915-07	2.70791	0.466222	1.4817	0.772801	0.817441	1.62208	0.657867	3.59314
TCGA-CV-7245-11A-01R-2016-07	2.33692	1.13439	2.63173	1.39059	1.3995	2.37798	1.09642	3.11535
TCGA-CV-7416-11A-01R-2081-07	2.304	1.1592	1.60988	1.10525	1.62337	0.945488	0.624157	3.77934
TCGA-CV-6938-11A-01R-1915-07	2.36394	1.72545	3.03745	1.81125	1.54213	3.01986	1.34263	4.3967
TCGA-CV-7101-11A-01R-2016-07	1.85173	0.89979	1.36763	1.17919	1.27146	1.05506	0.787649	4.79308
TCGA-CV-6960-11A-01R-2016-07	2.56772	1.01282	2.6282	1.14529	1.10292	1.26911	1.00095	4.71776
TCGA-CV-7434-11A-01R-2132-07	2.31107	1.38064	3.49587	1.70095	2.99645	1.98648	1.45238	3.12622
TCGA-CV-7183-11A-01R-2016-07	1.27948	0.537256	1.39076	0.699585	0.732407	1.06513	0.620837	4.16229
TCGA-CV-7252-11A-01R-2016-07	2.88604	1.36374	1.53755	1.52829	1.71194	0.965616	1.37399	3.88015
TCGA-HD-A6HZ-11A-11R-A31N-07	1.06641	0.511297	1.50983	1.46775	1.11547	0.950125	0.270887	3.00465
TCGA-CV-6934-11A-01R-1915-07	2.52793	1.06572	1.80927	2.86773	1.84126	1.50838	1.24105	4.47611
TCGA-CV-7255-11A-01R-2016-07	2.44132	2.19008	2.34592	2.51232	2.43507	1.79163	1.67119	4.55794
TCGA-HD-A6I0-11A-11R-A31N-07	3.02258	3.04219	3.60994	2.95602	2.3778	2.39335	1.71236	2.68247
TCGA-CV-7424-11A-01R-2081-07	2.1281	0.966391	1.88185	1.49385	1.4471	1.33629	0.989641	4.47364
TCGA-CV-7261-11A-01R-2016-07	1.38796	0.925353	1.51109	1.16543	1.31706	1.04846	0.833364	5.17687
TCGA-H7-A6C4-11A-21R-A466-07	1.9312	1.45146	1.32613	1.11331	1.38674	1.22779	1.06298	2.70043
TCGA-CV-7097-11A-01R-2016-07	2.65064	1.11306	3.73543	1.75654	2.47059	2.6798	1.27299	3.16243
TCGA-CV-7091-11A-01R-2016-07	2.97939	0.611623	1.51058	1.30742	1.07499	1.94928	0.618818	2.35393
TCGA-CV-6956-11A-01R-2016-07	3.81415	1.49259	1.80573	1.71939	2.38576	1.20328	0.826613	3.98105
TCGA-CV-6939-11A-01R-1915-07	1.61296	0.301753	1.8233	0.704967	0.923092	1.37737	0.349766	2.127
TCGA-CV-6962-11A-01R-1915-07	1.78107	1.19457	1.83816	1.62322	1.23133	1.73792	1.11692	4.60774
TCGA-CV-7432-11A-01R-2132-07	1.62588	1.02663	3.83935	1.14375	2.10971	1.09754	1.12288	3.44533
TCGA-CV-7178-11A-01R-2016-07	1.30918	0.912087	2.28786	1.52494	2.09464	1.22769	0.751049	4.08501
TCGA-CV-6955-11A-01R-2016-07	4.17688	2.51375	3.02081	2.86067	2.65168	2.96581	2.54641	4.08777
TCGA-CV-6935-11A-01R-1915-07	1.96256	1.29539	1.98183	1.14235	1.28617	1.42239	0.857221	4.14589
TCGA-CV-6936-11A-01R-1915-07	2.27297	2.31748	2.91218	1.9996	1.94348	2.35538	1.92914	3.97677
TCGA-CV-7425-11A-01R-2081-07	3.3865	2.52191	3.03064	2.92893	2.55431	2.78725	2.06278	4.13387
TCGA-CV-7437-11A-01R-2132-07	1.8322	1.17322	1.96042	1.69536	1.51965	1.17856	1.46082	4.39275
TCGA-CV-7235-11A-01R-2016-07	2.17684	2.72473	5.27619	2.70368	2.85443	2.47624	2.37103	3.61366
TCGA-CV-7406-11A-01R-2081-07	2.45663	1.25244	1.51333	1.16256	1.17236	1.11551	0.792594	2.85043
TCGA-CV-7103-11A-01R-2016-07	2.97754	1.32744	1.89374	1.6241	1.83246	1.86258	1.63691	4.1579
TCGA-CV-6933-11A-01R-1915-07	1.24389	0.159344	1.24607	0.778437	1.18678	0.748547	0.415973	2.12637
TCGA-CQ-A4CA-01A-11R-A24Z-07	3.15747	3.5051	4.11519	5.37742	3.67135	3.01846	3.19898	5.81467
TCGA-CQ-A4CE-01A-11R-A266-07	3.80747	2.36546	2.15699	2.29013	2.00365	1.62186	1.83642	4.01758
TCGA-QK-A6IF-01A-11R-A31N-07	3.41768	5.21371	4.13784	5.28405	4.48661	3.27761	4.29982	4.76821
TCGA-CV-6003-01A-11R-1686-07	3.14867	2.28091	2.30663	2.27099	1.25659	4.0357	1.29445	4.71831
TCGA-BA-A6DG-01A-21R-A30B-07	4.59247	2.917	3.31079	2.29961	2.06244	3.38344	2.03628	4.38382
TCGA-BA-4075-01A-01R-1436-07	4.13252	1.3128	3.45605	1.16946	1.00032	5.15376	0.919447	5.51058
TCGA-CN-4741-01A-01R-1436-07	2.70686	2.4758	3.07004	2.44812	1.97776	2.15039	2.19659	6.13558
TCGA-CR-7390-01A-11R-2016-07	2.00182	1.64284	2.32001	1.55795	1.31559	2.64637	1.47248	5.61641
TCGA-BA-A6DJ-01A-11R-A30B-07	5.21357	3.67787	3.46167	3.96566	3.02984	3.8459	2.75019	5.56822
TCGA-CV-6935-01A-11R-1915-07	2.78565	1.64973	3.13165	1.86565	1.9356	2.17191	1.48553	5.86646
TCGA-CN-4725-01A-01R-1436-07	2.26655	1.8285	2.11147	1.37237	0.809175	2.99416	1.0285	5.22288
TCGA-CV-5444-01A-02R-1514-07	3.59833	3.78257	4.95788	4.49981	2.92381	3.89844	3.26836	4.79782
TCGA-CV-7255-01A-11R-2016-07	2.76336	1.15756	1.69605	1.12761	1.01207	4.17323	1.04542	5.45928
TCGA-CR-6484-01A-11R-1873-07	4.74671	3.88846	5.12017	4.29015	4.12537	3.61752	3.20958	4.49457
TCGA-CQ-A4CD-01A-21R-A24Z-07	3.36175	3.05948	4.0737	4.03807	2.72899	2.90525	2.16576	5.31095
TCGA-BA-4077-01B-01R-1436-07	4.61126	2.57699	4.64786	3.72691	3.08769	3.91975	2.81538	5.51901
TCGA-F7-A61S-01A-11R-A28V-07	4.58591	3.6481	3.65601	4.73823	2.64869	4.75181	2.67217	4.29233
TCGA-QK-A6IJ-01A-11R-A31N-07	1.76036	3.2079	2.28989	3.49527	1.49617	1.29177	1.31977	3.89436
TCGA-D6-6517-01A-11R-1873-07	3.44539	3.22401	3.33259	2.54027	2.25205	3.2507	2.36864	5.04813
TCGA-CQ-7065-01A-11R-2081-07	1.45294	0.643995	0.919347	0.826836	0.600501	2.0486	0.615788	4.83681
TCGA-BB-A6UO-01A-12R-A34R-07	4.42104	2.03853	2.99202	2.54771	1.19474	3.58832	1.31303	4.51395
TCGA-CN-A498-01A-11R-A24H-07	3.83024	2.78846	2.82741	2.90872	2.51229	2.82904	2.33789	6.13379
TCGA-CQ-5329-01A-01R-1686-07	2.84785	3.70884	4.73139	3.82203	3.18528	4.36644	2.40816	5.70277
TCGA-D6-A4ZB-01A-11R-A24Z-07	2.12334	2.53215	2.45332	2.61457	1.74798	1.82234	1.99265	6.44104
TCGA-CV-7413-01A-11R-2081-07	2.82058	2.99478	3.48194	3.02076	2.11223	2.43473	2.54286	4.59323
TCGA-CV-6952-01A-11R-1915-07	4.39101	3.23308	3.06217	3.05838	1.97601	4.6599	1.96703	4.97255
TCGA-CR-7380-01A-11R-2016-07	3.08621	2.3549	3.33527	2.08447	1.77101	4.19031	2.30643	4.83472
TCGA-CR-7367-01A-11R-2016-07	2.97222	2.717	3.54904	2.84136	2.53472	3.48209	2.36578	3.93805
TCGA-IQ-A6SG-01A-12R-A34R-07	1.25735	1.907	2.22549	1.4546	1.22938	1.53176	1.50425	5.76926
TCGA-CQ-5327-01A-01R-1686-07	3.7277	2.86158	4.44403	4.50869	3.46213	4.71577	2.74287	4.5903
TCGA-CV-6441-01A-11R-1686-07	1.72368	0.767522	2.39121	1.40354	1.12446	0.782219	0.896612	4.86113
TCGA-BA-6870-01A-11R-1873-07	1.80849	2.87924	2.31774	2.06797	2.05478	2.02419	2.04312	5.71212
TCGA-MT-A7BN-01A-12R-A34R-07	1.94953	3.8583	4.54903	4.38071	2.86747	2.56684	2.15286	2.90915
TCGA-CV-A6JZ-01A-11R-A31N-07	4.47479	3.70877	5.08045	4.82573	3.68089	3.52396	3.31916	5.16421
TCGA-CQ-7071-01A-12R-A30B-07	3.5379	2.86744	3.1677	3.04943	2.25268	2.93494	2.30212	4.62294
TCGA-CV-6948-01A-11R-1915-07	2.68	2.28592	3.43445	3.19331	2.14427	2.3287	2.47842	4.79204
TCGA-CV-6962-01A-11R-1915-07	2.01094	0.977312	1.96571	1.39638	1.07867	2.09569	1.47718	5.62945
TCGA-CN-A63T-01A-11R-A28V-07	2.98507	3.91502	3.70079	4.12804	2.92513	2.45867	2.59693	4.3453
TCGA-CR-6473-01A-11R-1873-07	3.25649	3.18144	2.58517	3.05683	2.65565	1.94095	2.46361	5.80949
TCGA-CV-7423-01A-11R-2081-07	2.20654	1.89627	1.86488	1.11413	0.812048	2.51116	0.99947	4.31926
TCGA-CN-6019-01A-11R-1686-07	3.20346	3.03142	5.22941	2.69443	2.45214	3.66871	3.3033	5.13767
TCGA-CN-4728-01A-01R-1436-07	3.98882	3.84013	5.58743	2.89937	2.71319	4.51641	3.5049	4.35202
TCGA-CR-7377-01A-11R-2016-07	4.1183	3.13182	4.60788	4.19935	3.50728	4.09495	3.85624	4.08016
TCGA-P3-A6T0-01A-12R-A34R-07	2.9032	1.8448	2.04785	1.50847	1.15701	3.09726	1.20031	4.64924
TCGA-CR-7399-01A-11R-2016-07	5.91622	4.10665	5.60265	5.27858	4.52386	4.52064	4.34944	4.98441
TCGA-CN-5361-01A-01R-1436-07	3.33767	2.56332	3.49942	2.30459	2.18601	3.49218	2.15782	5.34558
TCGA-F7-8489-01A-31R-2403-07	5.11393	4.64663	3.91468	3.77446	3.54352	3.878	3.52377	5.55836
TCGA-BA-A4IF-01A-11R-A266-07	1.67827	1.8015	1.85686	1.76309	1.26935	1.84107	1.60227	5.97525
TCGA-CN-6992-01A-11R-1915-07	4.04647	2.54977	3.11755	2.14991	2.09889	2.52511	2.45792	6.14331
TCGA-D6-A74Q-01A-11R-A34R-07	2.93446	2.53578	2.74176	3.48496	1.94856	2.47215	2.14043	4.91388
TCGA-CV-6959-01A-11R-1915-07	4.16887	3.51842	3.69334	3.27587	2.47119	4.73743	2.4012	5.68457
TCGA-CN-A497-01A-11R-A24H-07	3.03223	3.18284	3.0338	3.58994	2.5797	2.7108	2.70871	5.28238
TCGA-MZ-A7D7-01A-21R-A34R-07	2.50985	1.37816	1.34243	1.13101	0.614803	2.52497	0.705024	4.12619
TCGA-CQ-A4CI-01A-11R-A266-07	4.34769	1.82024	2.42062	2.36145	1.50908	2.41417	1.35179	6.21494
TCGA-CV-5978-01A-11R-1686-07	4.97044	3.62417	5.89754	2.57346	2.31711	4.71399	2.61942	4.72792
TCGA-MT-A51X-01A-11R-A266-07	1.97651	1.93838	2.27981	1.73653	1.41566	2.0824	1.57602	4.43348
TCGA-CQ-5325-01A-01R-1686-07	6.74111	3.34336	4.90836	5.33272	3.75425	6.32349	3.48072	4.19058
TCGA-CV-7263-01A-11R-2016-07	2.2997	2.99261	4.39905	2.55492	2.36474	2.70783	2.47308	5.43917
TCGA-D6-6826-01A-11R-1915-07	3.38201	3.42761	4.99833	2.81436	2.70563	4.13409	2.59446	5.61358
TCGA-UF-A7JJ-01A-11R-A34R-07	3.14113	4.45625	4.7174	4.32268	3.86191	3.77425	3.68377	5.85071
TCGA-UF-A719-01A-12R-A34R-07	2.82949	1.62491	2.11262	2.62965	1.54888	2.30372	1.37681	6.72155
TCGA-CQ-6227-01A-11R-1915-07	2.76604	1.83274	2.94908	1.8753	1.60464	3.70333	1.67081	4.41953
TCGA-D6-A6EO-01A-11R-A31N-07	1.72234	2.24334	1.91843	2.1008	1.24124	2.01039	1.34674	5.86612
TCGA-CR-7371-01A-11R-2016-07	3.1408	3.33567	3.49501	3.34111	2.8932	3.55676	3.40278	4.21778
TCGA-CX-7082-01A-11R-2016-07	2.77789	2.55761	3.37168	3.89511	2.58598	2.60422	2.15568	5.58006
TCGA-CN-A499-01A-11R-A24H-07	6.00735	3.77915	4.50901	5.14836	3.75479	4.1962	3.69999	5.5323
TCGA-D6-6825-01A-21R-1915-07	4.83536	4.48918	4.62819	4.39325	3.58822	4.75488	4.04435	4.74758
TCGA-WA-A7H4-01A-21R-A34R-07	2.58325	3.55523	3.15408	1.82171	1.71409	2.77364	2.18207	5.1073
TCGA-F7-A620-01A-11R-A28V-07	4.97444	3.63091	3.80983	4.81133	3.31187	4.6107	2.91531	4.54114
TCGA-CV-5436-01A-01R-1514-07	2.42078	2.46039	2.91275	3.22093	2.07177	2.95906	2.06384	4.40639
TCGA-CR-5250-01A-01R-1514-07	3.35291	3.27436	3.14853	2.93911	2.87164	2.28506	3.43385	6.21818
TCGA-CN-4727-01A-01R-1436-07	2.47259	1.35777	1.49521	1.09844	0.888461	1.96235	1.0836	5.91656
TCGA-DQ-5624-01A-01R-1873-07	3.69993	3.55712	3.35614	2.18952	1.5743	3.06063	2.27923	4.40655
TCGA-CV-5430-01A-02R-1686-07	2.51528	3.06572	4.43351	3.1776	3.0304	2.45715	3.45393	6.21496
TCGA-CV-7100-01A-11R-2016-07	4.22764	2.70554	4.01175	4.29675	3.5816	4.58968	3.09888	5.99232
TCGA-CQ-5324-01A-01R-1686-07	3.2896	1.87339	3.6647	3.77509	2.65705	2.58137	2.59719	5.02948
TCGA-CR-6478-01A-11R-1873-07	6.42832	4.33728	5.29099	5.83479	3.74413	6.05137	3.56463	4.9071
TCGA-P3-A6SX-01A-11R-A34R-07	1.47819	1.54041	1.43176	1.39627	1.20886	2.54659	1.05204	6.07279
TCGA-BA-A6DL-01A-21R-A30B-07	1.85971	1.87983	1.44842	1.94007	1.34498	1.28985	1.37969	4.52167
TCGA-BA-A6DB-01A-11R-A30B-07	3.07832	3.64817	3.67501	3.78037	3.20339	2.7601	3.3597	4.18315
TCGA-CR-7370-01A-11R-2132-07	6.52013	3.3912	3.71373	3.32571	2.8688	4.41614	2.68846	6.4781
TCGA-CV-6942-01A-21R-2016-07	5.60737	3.88072	4.26761	5.09965	3.16258	5.70315	3.66955	4.53729
TCGA-CV-6433-01A-11R-1686-07	2.82042	4.3475	5.83822	6.81681	5.65253	2.77245	4.4584	6.0742
TCGA-UF-A7JT-01A-11R-A34R-07	5.57361	3.7239	5.18327	6.34625	4.38887	5.08077	3.45727	4.68525
TCGA-CQ-A4CH-01A-11R-A266-07	3.54157	1.86387	3.01748	2.00089	1.34886	3.38528	1.12349	4.67574
TCGA-CV-A468-01A-11R-A266-07	3.71699	3.69183	4.07872	5.65669	3.90645	3.35987	3.6605	3.76218
TCGA-BA-6873-01A-11R-1873-07	4.41725	3.1759	3.29153	3.03148	2.68558	4.31475	2.24611	5.8353
TCGA-CV-7254-01A-11R-2016-07	5.78154	3.49623	4.36811	3.67109	3.51231	4.04564	3.40108	4.56997
TCGA-TN-A7HI-01A-11R-A34R-07	2.63628	3.70607	3.29584	4.5835	3.34407	2.37844	2.98661	4.72344
TCGA-CV-A463-01A-11R-A266-07	2.15142	1.6081	1.8344	1.69258	1.33949	2.29566	1.22155	4.72602
TCGA-CV-6436-01A-11R-1686-07	2.81911	1.57267	2.92999	4.77387	3.53733	2.67051	2.11591	2.76605
TCGA-CR-7391-01A-11R-2016-07	2.87572	3.0128	3.57375	3.40309	2.93104	3.25278	3.14978	3.89478
TCGA-CR-7379-01A-11R-2016-07	3.62196	2.16295	3.70097	2.06621	1.67511	3.52238	1.69729	4.14591
TCGA-C9-A480-01A-12R-A24H-07	3.50314	2.13242	2.76148	2.98267	1.98536	2.8263	2.06018	4.59001
TCGA-CR-7393-01A-11R-2016-07	2.79409	3.14048	3.8224	3.21623	2.96232	3.79265	3.64253	3.88607
TCGA-CV-6960-01A-41R-2016-07	1.60236	1.71194	2.08975	1.23023	1.41384	1.61623	1.0999	4.66799
TCGA-CV-7097-01A-11R-2016-07	3.8751	3.25883	4.60167	4.52561	2.63891	4.33836	2.53103	5.34417
TCGA-QK-A6IH-01A-11R-A31N-07	1.21379	1.47912	2.50286	2.12528	1.25962	1.52521	1.08256	4.16738
TCGA-CR-6467-01A-11R-1873-07	3.67699	4.15557	4.59786	4.8127	4.81484	2.78725	4.69329	6.37643
TCGA-HD-7754-01A-11R-2081-07	2.28205	2.16963	4.06636	1.6443	1.65007	2.51012	2.18695	6.94324
TCGA-H7-A6C4-01A-11R-A30B-07	4.60338	2.93119	2.73168	1.72568	1.64373	3.56299	1.87631	4.19858
TCGA-BA-4078-01A-01R-1436-07	4.50344	3.05031	3.95611	3.09648	2.11852	3.60044	2.41412	6.63315
TCGA-CV-7414-01A-11R-2081-07	3.38033	1.8705	2.73872	1.81752	1.43739	2.16664	2.08478	5.10854
TCGA-CN-A6V3-01A-12R-A34R-07	3.80642	3.28738	3.28059	4.45776	3.46154	2.41512	2.65007	5.1635
TCGA-CV-7102-01A-11R-2016-07	2.15743	2.60612	4.08691	2.40934	1.97097	3.0484	2.00768	6.00811
TCGA-QK-A6V9-01A-11R-A34R-07	4.11327	4.54298	3.70003	4.41441	4.20742	2.72448	3.75571	6.2739
TCGA-HD-8314-01A-11R-2403-07	2.53647	3.87453	4.48484	2.77614	2.77286	3.41488	3.24278	5.60478
TCGA-CQ-7063-01A-11R-2403-07	6.26462	4.44778	4.17323	4.72125	3.81125	5.50557	3.42543	4.93586
TCGA-CR-7369-01A-11R-2132-07	3.9468	2.32343	2.71144	2.52827	1.84783	2.57603	2.31417	5.47829
TCGA-CV-7178-01A-21R-2016-07	2.53631	2.94004	4.59659	3.7369	2.87759	3.01826	3.04301	5.54377
TCGA-CN-5374-01A-01R-1436-07	2.77589	2.78292	3.36235	3.35723	2.73708	2.04632	2.96146	5.47593
TCGA-BB-A5HZ-01A-21R-A28V-07	2.84929	1.70203	1.51185	2.14127	0.942848	2.27474	0.914844	4.57803
TCGA-BA-5559-01A-01R-1514-07	5.13266	4.96312	5.45902	6.1083	5.42369	4.62668	4.84055	6.03556
TCGA-CV-6951-01A-11R-1915-07	2.4903	1.77134	2.07368	1.72631	1.19528	1.79077	1.518	5.1099
TCGA-BB-4228-01A-01R-1436-07	3.37701	2.82272	3.96796	2.75946	2.11547	2.6377	2.34594	6.77083
TCGA-CR-7368-01A-11R-2132-07	2.63592	3.39817	3.71663	3.12964	2.74661	2.82735	2.93146	6.49516
TCGA-HD-A6I0-01A-11R-A31N-07	2.89184	2.43556	2.61289	3.71502	2.16592	3.47344	1.43692	4.28427
TCGA-F7-A50G-01A-11R-A266-07	5.42248	3.04716	3.58259	2.94566	3.06439	4.44316	2.37116	5.08234
TCGA-DQ-5629-01A-01R-1873-07	2.7937	1.78465	2.15127	1.5373	1.6359	1.93795	1.71148	6.08308
TCGA-C9-A47Z-01A-11R-A24H-07	6.14035	2.68616	2.32127	2.89832	1.60633	5.08519	1.78199	5.24081
TCGA-CV-7242-01A-11R-2016-07	2.67971	3.38955	3.61305	3.89411	3.43733	2.68211	3.37731	5.12483
TCGA-CR-6472-01A-11R-1873-07	1.92112	1.93377	2.05625	2.26033	1.70611	1.82315	2.12957	5.13257
TCGA-BA-5556-01A-01R-1514-07	5.02934	3.85913	4.07609	4.8883	4.00166	4.4728	3.44618	4.91257
TCGA-DQ-7591-01A-11R-2081-07	2.95167	4.45772	4.29192	4.6448	4.07837	2.47607	4.21908	5.93407
TCGA-CR-7386-01A-11R-2016-07	3.53434	3.62858	4.67778	4.21539	2.743	4.32054	3.53225	4.37614
TCGA-BB-A5HU-01A-11R-A28V-07	2.6067	2.72725	3.17934	1.8483	1.6326	2.90588	1.80586	5.10088
TCGA-D6-A6EP-01A-11R-A31N-07	1.19225	1.90909	2.52402	3.85408	1.7891	1.036	1.00684	5.06887
TCGA-QK-A8Z7-01A-11R-A39I-07	1.21303	2.14329	2.59629	2.81043	1.25385	1.58569	1.51861	5.93657
TCGA-CX-7086-01A-11R-2081-07	2.70683	2.1774	2.26851	2.86159	1.96375	1.91955	1.99531	5.15507
TCGA-D6-A4Z9-01A-11R-A24Z-07	3.354	2.77024	3.04789	2.896	1.81843	3.19193	1.94421	5.31371
TCGA-CV-A6JT-01A-11R-A31N-07	3.47944	3.08669	2.85343	3.25251	1.85438	2.98474	2.09046	3.54567
TCGA-TN-A7HJ-01A-12R-A34R-07	1.73371	2.01675	2.0919	1.73359	1.26119	1.66473	1.22088	4.74784
TCGA-KU-A66T-01A-11R-A30B-07	2.17395	1.21427	1.46569	1.20245	0.800717	1.92897	0.833364	6.09105
TCGA-BB-8601-01A-11R-2403-07	2.28784	0.985994	1.20523	1.32613	0.955702	1.97896	0.910855	6.0365
TCGA-CV-6939-01A-11R-1915-07	4.83703	3.80722	4.50662	3.94181	3.27086	3.33051	3.75082	6.27622
TCGA-HD-A4C1-01A-11R-A24H-07	4.23385	1.86847	2.08502	2.04422	1.40055	3.40416	1.44963	5.16692
TCGA-P3-A5QE-01A-11R-A28V-07	4.62476	4.88849	3.41805	4.3547	4.27941	3.54997	4.15204	6.34503
TCGA-CQ-5326-01A-01R-1873-07	3.78815	2.2425	3.9308	2.45849	1.84156	4.48546	1.99603	5.35683
TCGA-CN-5366-01A-01R-1436-07	3.9176	2.23686	3.73833	3.50985	2.18194	4.38466	2.17972	4.85098
TCGA-CN-5358-01A-01R-1514-07	3.76327	4.26252	4.72148	3.61138	3.54361	4.3222	4.01127	4.78281
TCGA-CV-A6JM-01A-11R-A31N-07	1.351	2.32133	2.57572	3.08199	1.24887	1.14832	1.29184	3.83274
TCGA-BA-6871-01A-11R-1873-07	3.24457	3.45471	3.6002	3.8783	3.86856	3.00176	2.68559	5.53006
TCGA-CQ-6218-01A-11R-1915-07	2.90328	2.53536	3.08014	3.22981	1.71539	3.42648	1.83192	3.88355
TCGA-QK-A8Z9-01B-11R-A39I-07	3.10945	3.44354	4.10063	2.96956	2.30412	3.95895	3.19211	5.48205
TCGA-QK-A6VC-01A-23R-A34R-07	3.33172	3.76188	3.44329	3.66	2.37553	1.84282	3.16244	4.54383
TCGA-CQ-6222-01A-11R-1915-07	4.77209	2.76654	4.59278	3.46671	2.64149	4.32602	2.74459	3.93306
TCGA-CN-6012-01A-11R-1686-07	3.61239	3.33152	3.8393	3.83782	3.6399	2.90291	2.80367	6.25515
TCGA-CR-6491-01A-11R-1873-07	1.49772	2.12616	2.10087	2.30884	1.85266	2.23669	1.81418	5.28835
TCGA-CV-7101-01A-11R-2016-07	3.46907	2.35748	3.81498	2.66653	2.36817	2.99933	2.09796	5.33984
TCGA-P3-A6T3-01A-11R-A34R-07	2.54527	1.32654	1.93142	1.17839	1.14984	2.42534	0.963893	5.57288
TCGA-CR-7365-01A-11R-2016-07	1.80149	1.67159	2.8415	1.85852	1.36459	3.0351	1.48329	5.28281
TCGA-BA-A6DE-01A-22R-A31N-07	2.93013	1.99159	2.12656	3.38336	1.65153	2.50947	1.51727	5.36934
TCGA-IQ-A61J-01A-11R-A30B-07	3.56932	3.17258	3.62666	2.45408	2.5868	2.75372	2.62517	4.53755
TCGA-CV-5435-01A-01R-1686-07	4.00641	1.53608	2.90074	1.94554	1.59437	2.53396	1.53971	6.55884
TCGA-CV-7432-01A-11R-2132-07	2.93837	1.96313	2.35897	1.59467	1.1809	2.34177	1.11025	5.35432
TCGA-CQ-5332-01A-01R-1686-07	2.43933	2.56469	3.2947	1.85233	1.7069	2.88183	2.0625	5.54251
TCGA-CR-5248-01A-01R-2016-07	3.88825	4.46015	5.00951	6.46046	4.81633	3.62246	4.93209	5.94836
TCGA-CN-A6UY-01A-12R-A34R-07	4.03514	3.68167	4.21193	5.63516	4.49109	2.21376	3.23098	6.32144
TCGA-KU-A66S-01A-21R-A30B-07	2.38251	6.8807	2.84162	2.41036	2.7332	1.81577	1.97727	4.11244
TCGA-CV-A45V-01A-21R-A24Z-07	3.78634	2.34311	2.84536	2.91554	2.22558	1.94122	2.19149	4.59698
TCGA-CN-6016-01A-11R-1686-07	3.0843	2.40772	4.20333	2.35652	1.89458	2.89821	2.73495	4.63165
TCGA-UF-A7JO-01A-11R-A34R-07	4.92273	4.49172	5.14099	4.47405	3.75779	3.83195	3.14539	5.26749
TCGA-CV-7177-01A-11R-2016-07	1.66829	1.79086	3.09005	1.61341	1.56779	2.92286	1.43261	5.1237
TCGA-D6-6515-01A-21R-1873-07	5.5961	3.70698	5.10692	5.14986	3.87936	6.0738	3.89986	4.24716
TCGA-QK-A6IG-01A-11R-A31N-07	4.79783	3.60744	3.76683	4.31843	2.4768	4.20866	2.47158	4.10243
TCGA-CV-5443-01A-01R-1514-07	8.84972	3.67156	4.76588	4.90801	3.93299	3.29124	3.62085	5.35342
TCGA-HD-8635-01A-11R-2403-07	3.4543	1.90767	3.05313	2.26618	2.03218	4.12765	1.84004	4.87398
TCGA-BB-4223-01A-01R-1436-07	3.32704	3.86493	4.60192	4.60338	4.11985	3.00315	4.19499	6.74059
TCGA-CV-7434-01A-11R-2132-07	6.19603	2.39952	3.6889	3.99909	2.66355	6.00631	1.94827	4.92422
TCGA-UF-A71B-01A-12R-A34R-07	2.08823	2.86781	3.36457	3.30768	2.01862	2.69025	1.90501	5.19657
TCGA-CQ-A4C6-01A-11R-A24Z-07	5.45846	4.14101	3.34064	4.16219	2.63278	5.47084	2.61394	4.61477
TCGA-UF-A7J9-01A-12R-A34R-07	4.29905	3.15867	3.72165	2.30144	1.51005	3.24776	2.47236	5.84306
TCGA-DQ-7592-01A-11R-2081-07	2.49856	3.1012	3.65835	3.84461	2.82806	3.01695	2.67633	5.68168
TCGA-KU-A6H7-06A-21R-A31N-07	3.97851	2.59735	3.52141	4.32113	3.71034	2.46273	2.01583	6.54039
TCGA-CV-7438-01A-21R-2132-07	3.98846	3.24227	3.59168	3.35803	1.99507	3.71003	2.18835	4.87569
TCGA-CN-A63U-01A-11R-A30B-07	2.36213	1.13171	1.32203	3.24471	1.13292	1.79047	0.823608	5.34394
TCGA-CV-7415-01A-11R-2081-07	5.44931	3.22377	4.05394	4.4779	3.74677	6.22904	2.98789	5.88586
TCGA-CQ-6221-01A-11R-2081-07	1.74488	1.21688	3.57419	1.49793	1.19876	3.26632	1.18688	3.62098
TCGA-CN-6998-01A-23R-2016-07	4.99512	2.10549	2.27907	2.84611	1.36165	2.62913	1.77609	3.88159
TCGA-MZ-A5BI-01A-31R-A34R-07	5.35972	5.31396	4.37125	4.72324	4.08216	3.5572	3.7477	4.48586
TCGA-CN-4740-01A-01R-1436-07	3.36547	2.67576	5.22349	2.76155	2.27375	3.82827	2.68553	4.55942
TCGA-CV-A45Q-01A-11R-A24H-07	3.42144	0.684982	1.72887	2.11177	0.390207	3.42089	0.827363	2.84473
TCGA-QK-A8ZA-01A-11R-A39I-07	5.7238	2.29076	2.2068	2.17007	1.62099	4.14492	1.55169	6.75734
TCGA-CV-5979-01A-11R-1686-07	1.70795	1.97806	2.59962	2.52006	1.42962	3.40242	1.40217	5.0926
TCGA-CN-6997-01A-11R-2016-07	1.78759	1.85727	3.45445	1.72792	1.55729	1.88651	2.22271	4.27975
TCGA-CN-5367-01A-01R-1436-07	1.64748	1.93973	3.77924	3.23725	1.70435	2.79321	1.53503	5.91249
TCGA-CN-4734-01A-01R-1436-07	4.70746	3.78622	4.06266	4.34501	3.10713	5.13764	3.31333	4.65155
TCGA-DQ-7588-01A-11R-2081-07	1.69556	0.976925	1.08064	1.43667	1.36128	1.91264	1.0323	5.69354
TCGA-D6-A6EK-01A-11R-A31N-07	2.48599	3.64534	2.51999	3.63013	2.50835	1.71877	2.67127	4.08437
TCGA-CV-7183-01A-11R-2016-07	1.45499	0.60308	1.15864	0.898195	0.707657	1.66444	0.791812	4.2779
TCGA-CN-6017-01A-11R-1686-07	5.26674	4.22516	5.08765	5.82955	4.28183	5.04074	4.33991	3.5398
TCGA-P3-A5Q5-01A-11R-A28V-07	3.15483	4.54398	5.37926	5.26196	5.00307	3.3763	4.34904	5.61206
TCGA-CR-7374-01A-11R-2016-07	2.23838	3.6486	2.74012	2.96275	2.59938	2.25857	3.88098	6.42741
TCGA-CR-7392-01A-11R-2016-07	4.30787	3.89436	4.17464	4.39725	3.14715	4.46662	3.4902	4.34258
TCGA-CV-7095-01A-21R-2016-07	2.91943	1.99442	2.92947	2.16196	1.54108	1.63232	1.63127	5.00275
TCGA-CQ-7069-01A-11R-2403-07	3.30828	2.30891	2.80499	2.23464	1.88871	3.95352	1.42784	3.75732
TCGA-CN-5364-01A-01R-1436-07	3.19366	1.79475	3.93697	2.28183	1.49069	2.47398	1.9563	5.31859
TCGA-CN-A63V-01A-11R-A466-07	2.7484	1.48337	2.6607	1.57628	1.54544	1.97932	1.63749	3.75635
TCGA-CV-7238-01A-11R-2016-07	2.92158	3.22157	3.17256	3.19927	2.88605	2.67503	2.67478	3.85003
TCGA-CN-6021-01A-11R-1686-07	1.67169	1.53876	2.11727	1.82248	2.13803	1.90224	1.86133	5.56826
TCGA-CN-4723-01A-01R-1436-07	3.44407	3.77833	3.85493	3.90701	2.78252	3.45707	2.97984	5.81609
TCGA-UF-A7JA-01A-12R-A34R-07	2.12947	2.1026	2.44663	2.24657	1.80543	2.24958	1.85538	6.23469
TCGA-CV-5441-01A-01R-1514-07	3.55592	2.05007	2.45983	3.08825	2.06353	2.49182	1.87749	6.19959
TCGA-P3-A6T2-01A-11R-A34R-07	3.79982	2.79081	2.8252	2.39815	1.67621	4.83243	1.6353	5.16392
TCGA-BA-5153-01A-01R-1436-07	3.08653	4.24783	4.18588	4.77563	4.31132	2.34029	4.26554	6.62776
TCGA-F7-7848-01A-11R-2132-07	2.32852	2.83233	3.37179	3.46391	2.7349	2.61849	3.0845	6.06041
TCGA-IQ-7630-01A-11R-2081-07	3.3902	2.98697	3.30893	3.24383	2.15181	2.82624	2.1555	5.40423
TCGA-CN-6018-01A-11R-1686-07	4.19303	3.38912	4.69648	4.4977	2.82236	4.48652	2.72828	5.25072
TCGA-HD-7229-01A-11R-2016-07	5.57828	3.28317	3.41742	4.00897	2.38459	6.39502	2.63602	5.05674
TCGA-CR-6487-01A-11R-1873-07	5.82211	5.51708	5.59621	6.63133	5.45758	5.16259	5.09752	6.16183
TCGA-CR-7383-01A-11R-2132-07	2.76826	3.56348	4.54796	3.24769	2.79153	3.5188	2.89107	5.10419
TCGA-CR-5249-01A-01R-1514-07	4.48332	3.49094	3.8008	3.6996	3.65954	3.3999	3.74789	5.82691
TCGA-P3-A6SW-01A-11R-A34R-07	5.81157	3.16304	3.78977	4.0865	3.51156	4.49641	2.5791	7.3791
TCGA-CQ-6223-01A-11R-1915-07	3.25385	2.46853	2.6394	2.04708	2.17303	2.31312	1.77496	4.68089
TCGA-HD-7831-01A-11R-2132-07	3.81641	2.33803	3.49515	1.71523	1.67218	4.32341	1.85013	4.90582
TCGA-CR-7364-01A-11R-2016-07	3.1059	3.0553	2.7403	2.91736	1.57466	2.45824	2.67096	5.34904
TCGA-CV-5442-01A-01R-1514-07	2.90671	1.37968	1.74134	1.54146	1.63024	1.40802	1.40189	5.6837
TCGA-CV-5432-01A-02R-1686-07	1.36983	1.86709	2.68064	2.21312	1.9194	1.71612	1.85502	5.44349
TCGA-CV-6953-01A-11R-1915-07	2.60132	2.04411	2.58834	2.42609	1.47382	2.17895	1.98843	4.28389
TCGA-F7-A622-01A-11R-A28V-07	1.1742	1.25057	1.45849	1.26852	0.696505	2.53474	0.498888	4.27747
TCGA-CV-6956-01A-21R-2016-07	1.79392	0.712865	1.24251	1.84613	0.837631	1.66463	0.835244	6.09201
TCGA-QK-A8ZB-01A-11R-A39I-07	1.74504	2.22994	3.14663	1.92149	1.43848	2.1375	1.97194	5.99706
TCGA-CV-6941-01A-11R-1915-07	2.65757	3.03965	3.53906	3.1505	2.03442	2.89917	2.39995	5.63064
TCGA-CV-A6JN-01A-11R-A31N-07	3.47668	3.28448	2.02232	3.76206	1.80621	2.93989	1.54922	3.87383
TCGA-CN-6995-01A-31R-2016-07	4.05728	3.54047	4.31269	4.92238	3.21944	3.43063	3.61766	5.63294
TCGA-CV-7236-01A-11R-2016-07	2.95979	2.37027	3.33261	2.17846	1.82385	3.309	1.79926	4.26209
TCGA-UF-A7JV-01A-11R-A34R-07	6.75682	4.07115	4.34302	4.06494	2.31971	5.64028	2.29149	4.06754
TCGA-P3-A6T8-01A-11R-A34R-07	2.59115	2.84144	2.22761	1.57099	1.44676	3.04485	1.65519	5.61583
TCGA-BA-6869-01A-11R-1873-07	2.39247	2.44358	2.35218	2.70568	2.34948	1.50975	1.87143	5.66914
TCGA-BA-4076-01A-01R-1436-07	2.26049	2.69463	1.84766	1.53491	1.11384	2.31899	1.15201	6.0966
TCGA-RS-A6TO-01A-32R-A34R-07	4.12063	3.24997	3.899	4.01434	2.97601	4.3524	2.7871	4.93571
TCGA-CQ-A4CB-01A-11R-A24Z-07	3.61155	3.55076	3.87848	2.67967	1.96569	3.98681	2.03726	5.36345
TCGA-CR-7395-01A-11R-2016-07	5.26278	4.39947	4.45264	4.2674	3.62774	4.89294	3.32651	4.97047
TCGA-P3-A6T6-01A-11R-A34R-07	1.43615	1.21237	1.5304	1.81326	1.24475	1.00349	0.940667	5.67623
TCGA-IQ-A61E-01A-22R-A30B-07	4.17775	3.66417	3.60159	3.73051	2.11912	4.10825	2.72189	5.68797
TCGA-CN-5360-01A-01R-1436-07	5.00938	4.18071	4.92686	4.30449	4.52353	4.71624	4.20596	6.11603
TCGA-CQ-7072-01A-21R-A30B-07	2.15476	2.84553	3.31428	2.36414	1.45513	2.50098	2.01599	4.76959
TCGA-CV-6943-01A-11R-1915-07	5.41962	3.49153	4.8776	5.42783	4.32477	4.5087	3.82822	4.30385
TCGA-CV-7089-01A-11R-2016-07	4.03729	2.37418	2.87171	2.63664	1.97114	5.28051	1.84083	4.23414
TCGA-D6-A6EN-01A-11R-A31N-07	4.85394	4.16737	5.37324	7.09881	3.91639	3.55692	3.57219	4.18106
TCGA-CQ-6225-01A-11R-1915-07	0.932265	0.840651	1.77294	1.93516	0.660439	0.786412	0.979245	5.25375
TCGA-CV-7411-01A-11R-2081-07	2.21407	1.44644	1.81702	1.16412	1.258	1.81818	1.24337	4.68114
TCGA-CV-A45U-01A-12R-A24H-07	3.20122	3.53323	3.24253	3.56754	3.03049	1.94925	3.28506	5.96539
TCGA-CV-A45X-01A-21R-A24Z-07	1.36191	1.89346	1.98143	0.96392	0.800696	0.966363	1.20231	4.1934
TCGA-CV-7430-01A-11R-2132-07	1.72511	1.31602	2.29257	1.50469	1.2066	1.04573	1.26931	4.42436
TCGA-CV-6940-01A-11R-1915-07	2.49086	1.94259	2.86121	2.14123	1.52155	2.4893	1.59474	5.2105
TCGA-BB-A6UM-01A-12R-A34R-07	4.93287	3.60313	3.81092	5.07198	3.70983	2.3534	3.49961	5.9688
TCGA-CN-6994-01A-11R-1915-07	2.7762	2.59432	3.50723	2.50065	1.84867	2.71236	2.19341	5.22605
TCGA-CV-A45O-01A-21R-A24H-07	4.44417	1.77668	2.24806	1.99584	1.41912	2.76554	1.38325	3.50222
TCGA-QK-A652-01A-11R-A30B-07	3.62913	3.30642	2.89731	2.79688	2.26008	3.36727	2.45774	4.51288
TCGA-CX-A4AQ-01A-11R-A24Z-07	1.81422	4.41773	4.17948	4.14568	4.28407	2.20773	3.51649	5.41876
TCGA-CR-7401-01A-11R-2016-07	2.23327	2.55455	2.73456	1.87097	1.4341	2.94236	1.81015	4.33938
TCGA-T3-A92N-01A-11R-A39I-07	4.96779	2.90114	3.46521	3.39208	2.67145	2.66616	1.97021	4.63467
TCGA-CV-7407-01A-11R-2081-07	4.70061	3.27174	4.3923	3.4501	2.10026	3.88183	2.67268	5.74207
TCGA-CN-4722-01A-01R-1436-07	1.45365	1.25503	1.65812	1.29531	1.38877	1.91734	1.74289	4.42047
TCGA-UF-A7JK-01A-11R-A34R-07	2.13424	0.949522	1.30444	1.02072	0.949915	2.02701	0.9265	5.56476
TCGA-CR-6471-01A-11R-1873-07	4.39626	3.13563	3.50542	3.26828	3.14706	3.35168	3.7813	5.59665
TCGA-CV-A45Z-01A-21R-A24Z-07	3.85401	3.46984	4.131	3.80333	3.05267	3.15391	2.86414	5.51575
TCGA-CQ-6229-01A-11R-1915-07	3.71696	2.89029	3.33524	3.06221	2.17573	3.97901	2.14131	4.80067
TCGA-T2-A6WZ-01A-21R-A34R-07	2.13679	2.10511	2.37456	2.57334	1.66899	2.29668	1.39604	4.37367
TCGA-P3-A6T4-01A-11R-A34R-07	2.99866	2.28433	2.039	1.29408	1.43285	1.93762	1.61904	3.9053
TCGA-CV-6945-01A-11R-1915-07	1.15614	1.10723	1.75502	1.64019	0.801517	1.56638	0.809562	5.21934
TCGA-BB-4227-01A-01R-1873-07	2.23766	1.5207	2.32329	1.23542	1.08978	2.41644	1.06961	5.90607
TCGA-BA-A4IG-01A-11R-A266-07	2.75428	3.12843	2.90934	2.71071	3.07431	2.21825	2.59063	5.55294
TCGA-UF-A71D-01A-12R-A34R-07	2.05139	1.31112	1.71481	1.94534	1.83871	1.2816	1.74566	5.87238
TCGA-IQ-A61I-01A-11R-A30B-07	3.22856	3.5027	3.42547	3.86742	3.09613	1.97016	2.70996	5.42713
TCGA-D6-8569-01A-11R-2403-07	3.47182	3.37193	3.12531	3.40823	2.31351	3.40326	2.36015	5.16783
TCGA-MT-A67F-01A-11R-A30B-07	6.82236	4.94644	4.93732	5.54372	4.36747	5.98891	4.54544	4.96205
TCGA-CN-6996-01A-11R-1915-07	5.70502	4.97919	4.88121	5.10235	3.45697	5.4067	3.58985	5.17095
TCGA-CV-5971-01A-11R-1686-07	3.39324	3.2386	3.71182	3.35764	2.46738	3.36339	2.75265	3.70427
TCGA-CV-6954-01A-11R-1915-07	2.66906	2.58664	3.64196	3.65217	1.85832	3.01432	2.28135	6.09674
TCGA-CV-7252-01A-11R-2016-07	3.38702	2.47319	3.50336	2.22906	1.7692	4.0376	1.794	5.28447
TCGA-CQ-5330-01A-01R-1686-07	4.8131	4.25499	5.27562	5.92263	3.71913	5.25501	3.15618	4.70461
TCGA-P3-A6T7-01A-11R-A34R-07	4.16466	2.13997	2.41704	2.54442	1.63677	3.0278	1.58741	4.80561
TCGA-CN-6011-01A-11R-1686-07	5.37906	1.90602	3.23533	4.47564	2.30188	4.71857	2.00434	6.90602
TCGA-CN-4733-01A-02R-1873-07	4.62138	4.94623	4.95697	5.56835	4.59548	5.66663	4.64255	4.63457
TCGA-CN-5356-01A-01R-1436-07	2.21475	2.15029	2.86739	1.75199	2.33891	2.63688	1.94401	6.10145
TCGA-F7-A623-01A-11R-A28V-07	1.90699	2.98291	2.71894	3.08315	2.02437	1.65454	2.09391	4.41081
TCGA-CV-7104-01A-11R-2016-07	4.92233	3.27739	4.21373	4.13176	2.6654	3.98666	2.81637	4.77643
TCGA-CV-A45T-01A-11R-A24H-07	4.41882	4.22686	3.61849	4.81287	3.73319	4.17928	3.3371	4.11266
TCGA-CV-7090-01A-11R-2016-07	3.56364	3.35685	4.84187	4.70279	2.6581	4.23448	2.53475	4.52087
TCGA-CV-6955-01A-11R-2016-07	3.68455	1.67532	2.52842	2.18112	1.69724	1.9814	1.92848	3.99281
TCGA-CN-4739-01A-02R-1514-07	2.34838	2.75263	3.06722	3.24285	3.11944	2.05683	2.89161	5.42485
TCGA-CR-6488-01A-12R-2081-07	3.30582	3.22918	4.84606	2.60079	2.01711	3.35797	2.65204	3.94671
TCGA-CV-5977-01A-11R-1686-07	3.86371	2.09598	2.35351	2.45125	1.35489	4.50952	1.29714	4.41895
TCGA-CN-6010-01A-11R-1686-07	5.08359	2.28011	3.2277	2.71874	2.85153	3.05288	1.9899	5.01956
TCGA-CN-4742-01A-02R-1514-07	2.69601	2.08577	3.38173	2.56256	1.31173	2.77262	2.11468	4.96658
TCGA-CV-6961-01A-21R-1915-07	3.22867	1.99534	3.52459	2.68163	2.01951	2.52239	2.10201	5.11132
TCGA-IQ-A61G-01A-11R-A30B-07	1.61857	2.26913	2.33259	1.87234	0.935721	1.67716	1.21149	6.116
TCGA-CN-6020-01A-11R-1686-07	3.1803	2.58814	3.7857	2.73537	1.76307	2.81353	2.02302	5.25473
TCGA-CV-5431-01A-01R-1514-07	4.21371	4.19601	5.04418	5.19338	4.57864	3.95655	4.29013	4.90905
TCGA-CV-7248-01A-11R-2016-07	2.65339	2.51526	3.69439	2.95159	2.97162	2.55809	2.69357	4.38234
TCGA-CV-7429-01A-11R-2132-07	3.81822	2.69449	4.28949	3.67627	2.89431	3.56762	2.684	5.63346
TCGA-CV-7253-01A-11R-2016-07	1.71558	1.15336	1.60713	1.38079	1.08743	1.43305	1.05879	5.44579
TCGA-CV-7421-01A-11R-2081-07	3.03434	1.71252	3.05467	2.64182	1.30078	2.70323	1.40162	5.24983
TCGA-CN-A641-01A-11R-A30B-07	1.48979	1.44917	1.82865	1.47576	0.960118	1.20418	0.835611	6.1072
TCGA-CN-4726-01A-01R-1436-07	2.56115	1.40423	2.37947	0.906866	0.831861	2.81705	1.23413	4.96794
TCGA-CN-5373-01A-01R-1436-07	5.9333	3.52752	3.87838	3.83742	2.84032	5.0348	2.77083	4.84992
TCGA-UF-A7JS-01A-11R-A34R-07	1.4577	2.88089	3.18338	4.87719	1.48021	1.32077	1.31575	4.00653
TCGA-CV-A464-01A-11R-A266-07	2.55308	3.45052	3.06393	2.58057	2.08652	3.028	2.40337	4.93677
TCGA-UF-A71E-01A-31R-A34R-07	3.55499	1.25746	1.71911	1.88554	0.773607	1.75474	0.882767	6.02038
TCGA-CV-6934-01A-11R-1915-07	3.58905	3.00873	4.74734	4.18227	3.18319	3.90907	3.51397	4.53414
TCGA-QK-AA3J-01A-11R-A39I-07	2.08189	2.62402	2.37479	3.01002	2.46574	1.49319	2.46669	5.73966
TCGA-CV-7245-01A-11R-2016-07	1.78046	2.07703	2.32218	2.14875	1.57947	2.42554	1.83091	4.76986
TCGA-CV-A6K0-01B-21R-A31N-07	4.93957	4.40689	4.34368	3.58179	3.27836	4.87187	3.19902	4.22106
TCGA-CV-6936-01A-11R-1915-07	2.58324	2.25879	3.41264	3.78807	2.90935	2.37437	2.66415	5.05749
TCGA-CV-7418-01A-11R-2081-07	2.69981	3.70666	3.87313	3.87883	2.79837	2.46201	2.85539	5.17157
TCGA-CN-4729-01A-01R-1436-07	3.00801	2.26448	2.62853	2.48759	1.81721	2.25988	2.08841	4.75692
TCGA-CR-6482-01A-11R-1873-07	3.32204	3.91336	4.65932	4.75437	4.24422	3.86525	4.17836	5.1515
TCGA-DQ-5631-01A-01R-1873-07	2.81237	2.55857	2.92437	1.84195	1.50296	3.30314	1.61758	4.61563
TCGA-CN-6024-01A-11R-1686-07	4.19363	1.50533	2.33714	1.43362	1.09267	2.11308	1.29137	5.43601
TCGA-WA-A7GZ-01A-11R-A34R-07	1.83807	1.88398	2.09218	1.75742	1.14517	1.84084	1.24278	5.98126
TCGA-CN-5355-01A-01R-1436-07	3.14495	2.35664	2.85901	1.97709	1.94262	3.68832	1.85062	5.22883
TCGA-IQ-7631-01A-11R-2081-07	0.702358	0.360799	0.963948	0.51204	0.3834	0.900895	0.333236	3.35727
TCGA-CN-4735-01A-01R-1436-07	3.63156	3.31864	5.09825	4.3679	3.42673	3.53251	3.32248	4.91971
TCGA-CX-7085-01A-21R-2016-07	4.85443	3.67497	4.71883	4.1223	3.61549	4.65657	3.84102	4.34587
TCGA-CV-7568-01A-11R-2232-07	4.31265	2.70513	2.99207	2.69614	1.79489	3.73881	2.62963	6.22395
TCGA-CV-A45P-01A-11R-A24H-07	2.44945	2.03063	1.58729	1.90218	1.45667	2.31245	1.32215	4.24303
TCGA-CV-7410-01A-21R-2081-07	4.28017	3.74674	4.44419	3.74829	4.31335	3.86035	4.23919	5.02278
TCGA-HD-A633-01A-11R-A28V-07	1.84323	1.76699	2.42862	1.17541	1.14994	1.99797	1.21472	4.65954
TCGA-CV-7099-01A-41R-2016-07	4.95457	3.19483	4.19292	4.02594	2.53913	4.34782	2.76772	4.55912
TCGA-CV-7428-01A-11R-2132-07	4.31866	3.21507	4.07748	3.62875	3.39045	3.842	3.08179	5.90805
TCGA-BA-A6DD-01A-12R-A31N-07	2.63785	3.33139	3.50248	4.10088	3.13653	2.76714	2.06579	5.1477
TCGA-BA-A6DA-01A-31R-A31N-07	1.46023	1.202	1.6469	1.80246	1.2226	1.95281	0.699065	4.51462
TCGA-CR-6493-01A-11R-1873-07	3.8838	1.90684	2.28022	2.35657	1.52096	3.92064	1.37572	5.24579
TCGA-CQ-5334-01A-01R-1686-07	4.6348	3.89156	4.85343	5.20083	4.26796	5.03904	3.59957	5.36362
TCGA-CV-A461-01A-41R-A266-07	3.70101	3.94748	5.15525	5.49791	4.67696	3.81902	4.34851	5.52633
TCGA-F7-A50J-01A-21R-A28V-07	3.79089	2.76775	2.11607	2.35709	1.64083	2.2687	2.47914	4.08222
TCGA-UF-A7JH-01A-21R-A34R-07	2.36862	3.24293	3.84928	3.93086	2.609	2.39981	2.02441	5.54441
TCGA-HD-7753-01A-11R-2081-07	3.86315	3.44387	2.99034	2.85589	2.39246	3.56124	2.29243	4.59756
TCGA-CN-4730-01A-01R-1436-07	1.11766	0.964678	1.5389	1.23648	0.759449	1.42795	0.855888	5.01965
TCGA-CV-5439-01A-01R-1686-07	3.26459	2.43653	3.02824	2.38746	2.66777	2.84225	2.24056	5.23804
TCGA-CQ-6224-01A-11R-1915-07	3.2078	3.06862	4.35455	4.31665	1.98284	4.0283	2.64724	4.64184
TCGA-BB-4225-01A-01R-1436-07	3.22278	4.21661	4.38088	5.11451	3.51837	2.43552	3.93911	5.87261
TCGA-CV-A6JY-01A-11R-A31N-07	1.32398	1.46306	1.77399	1.26418	1.17034	0.911632	1.11223	4.75447
TCGA-CN-A49B-01A-31R-A24H-07	4.38482	4.37894	4.7607	5.3143	3.64366	2.77206	3.32955	5.34037
TCGA-IQ-A61O-01A-11R-A30B-07	3.65065	2.31553	4.09814	2.09278	2.03042	5.0079	2.02321	3.18475
TCGA-BA-A4IH-01A-11R-A266-07	3.32519	3.71902	3.57453	3.92254	2.9491	2.61521	2.57099	5.55035
TCGA-CR-7388-01A-11R-2016-07	3.12191	3.82373	3.66417	3.66881	2.84676	3.22829	3.12627	5.872
TCGA-MT-A67D-01A-31R-A30B-07	3.02218	3.16392	2.80767	2.34522	1.82423	2.65694	1.94919	4.2634
TCGA-CQ-A4C7-01A-11R-A24Z-07	4.62508	3.2724	3.39652	3.16456	2.62176	4.38322	1.83885	4.87732
TCGA-CV-7437-01A-21R-2132-07	2.34731	1.39598	2.77448	2.10445	1.36592	2.02221	1.32992	4.32052
TCGA-IQ-A61H-01A-11R-A30B-07	5.95415	1.55434	3.12788	1.98728	1.66963	3.9959	1.8776	5.31551
TCGA-P3-A6T5-01A-11R-A34R-07	3.08314	2.2249	2.83902	1.9031	1.72588	3.14152	1.35506	5.273
TCGA-QK-AA3K-01A-11R-A39I-07	2.6268	3.62683	3.96317	3.87372	2.79956	2.79421	2.43717	4.59052
TCGA-CQ-5323-01A-01R-1686-07	3.5596	2.5321	2.99472	3.10815	3.18235	2.44533	2.61315	6.0277
TCGA-TN-A7HL-01A-11R-A34R-07	5.24562	4.55186	5.67905	6.20301	4.77832	3.98098	4.06313	5.55376
TCGA-CN-A63W-01A-11R-A30B-07	1.87171	1.73246	2.27611	3.54949	1.49076	1.4544	1.851	4.84738
TCGA-CR-7397-01A-11R-2016-07	2.33907	2.35592	3.73556	2.59161	2.29263	2.79988	2.55105	3.8192
TCGA-CN-A6V7-01A-12R-A34R-07	2.71456	2.71627	3.01601	3.19945	2.9268	1.79206	2.13224	4.80959
TCGA-CV-A6JO-01B-11R-A34R-07	5.54546	3.21888	3.94621	4.37174	3.26831	4.02587	2.8659	3.82952
TCGA-HD-8634-01A-11R-2403-07	4.26582	1.96653	2.10679	2.38821	1.48773	3.50047	1.36892	4.41505
TCGA-UF-A71A-06A-11R-A39I-07	3.25974	0.977605	2.06648	1.61889	0.945397	2.36031	0.867361	5.98923
TCGA-CN-4738-01A-02R-1514-07	3.58272	3.45054	4.17675	3.9611	3.48232	3.32021	3.20622	5.04564
TCGA-CN-6013-01A-11R-1686-07	5.33384	4.81406	5.05925	5.16966	4.09747	3.82492	3.76361	4.3668
TCGA-BB-8596-01A-11R-2403-07	3.5015	3.28153	4.68113	2.21821	2.42634	3.24225	2.73199	4.62599
TCGA-D6-6824-01A-11R-1915-07	3.30507	2.90561	4.47993	3.23167	2.63909	4.22754	2.83177	4.15316
TCGA-BA-5151-01A-01R-1436-07	3.49131	2.77554	3.00836	2.52684	1.78802	3.27373	2.16525	4.21244
TCGA-CR-6492-01A-12R-2081-07	4.07669	2.67006	3.1468	3.11588	2.16194	3.62771	1.9703	4.45653
TCGA-CV-7091-01A-11R-2016-07	3.53424	3.02583	2.96804	2.40064	2.2074	3.22475	2.45584	4.81335
TCGA-CV-7261-01A-11R-2016-07	3.60443	2.26849	3.40887	2.27024	1.92043	3.03048	1.91226	6.18186
TCGA-BA-A4II-01A-11R-A266-07	2.15674	3.18607	3.09695	2.75284	2.01167	2.49156	1.97218	5.83115
TCGA-UF-A7JC-01A-21R-A34R-07	3.41928	1.32183	1.67091	1.21264	1.11525	3.14218	0.934972	5.05555
TCGA-KU-A6H7-01A-11R-A31N-07	5.62525	3.74836	4.49138	5.33646	4.58378	2.97947	3.32719	5.74679
TCGA-BA-5152-01A-02R-1873-07	3.58458	3.95194	4.00529	4.30443	2.54902	3.17264	2.95803	4.38892
TCGA-MT-A51W-01A-21R-A266-07	3.90807	2.31894	2.23742	2.94412	1.90903	2.88861	1.62104	4.54839
TCGA-CV-5973-01A-11R-1686-07	1.87464	1.43612	1.67963	0.746543	0.647887	1.04931	1.04269	3.29103
TCGA-QK-A6VB-01A-12R-A34R-07	1.36886	1.06885	2.63851	1.96816	1.12142	1.62237	1.02778	5.92838
TCGA-UF-A71A-01A-22R-A34R-07	3.69252	1.30926	3.04499	1.70472	1.22886	2.73771	1.03359	5.70382
TCGA-CV-5976-01A-11R-1686-07	2.6747	1.94523	3.06957	2.29444	1.56669	2.24071	1.68201	5.66582
TCGA-CV-5970-01A-11R-1686-07	2.93205	2.7924	3.06174	2.0302	1.65293	3.02382	1.82753	4.03563
TCGA-BB-A5HY-01A-11R-A28V-07	2.47684	2.60758	2.06286	2.53164	1.70389	2.56865	1.53237	5.57504
TCGA-BA-A6D8-01A-31R-A31N-07	1.32213	2.25848	2.6755	2.40946	1.34827	1.81707	0.924392	3.85281
TCGA-CN-A642-01A-12R-A30B-07	3.90702	3.08118	3.70158	4.17093	3.22127	3.42602	2.97704	5.16763
TCGA-CV-A465-01A-11R-A266-07	1.36534	1.17369	1.5338	0.918426	0.835782	1.57028	0.711108	3.92402
TCGA-CV-7440-01A-11R-2132-07	3.33402	2.15033	2.86585	2.64286	1.45819	3.07292	1.68295	4.18286
TCGA-MT-A67A-01A-11R-A30B-07	2.33468	0.834528	2.06098	2.65567	1.43474	1.34271	1.37078	3.30298
TCGA-CR-7385-01A-11R-2016-07	3.85239	4.10649	4.2933	3.49762	3.64415	3.19146	3.52455	6.23586
TCGA-CR-7394-01A-11R-2016-07	4.32411	3.42405	4.66344	5.11443	3.97238	4.45525	4.1267	4.11232
TCGA-P3-A5QA-01A-11R-A28V-07	6.283	2.52131	1.92797	1.99236	1.30721	4.53909	1.40921	3.59301
TCGA-CR-5247-01A-01R-2016-07	1.3922	1.369	2.13929	1.47494	1.00102	2.77875	1.08115	5.95327
TCGA-CN-4736-01A-01R-1436-07	4.95987	3.44338	4.97534	4.69318	3.3103	4.01528	3.33563	5.26296
TCGA-BB-4217-01A-11R-2081-07	3.07404	3.5873	3.66793	3.55243	4.35118	2.88841	4.0411	5.2329
TCGA-CV-7433-01A-11R-2132-07	3.84014	4.1616	5.4997	5.85565	4.09708	4.02191	4.00414	4.3728
TCGA-T3-A92M-01A-31R-A39I-07	3.4771	3.72292	4.30933	3.97857	2.75976	2.59792	3.1158	6.11447
TCGA-H7-A76A-01A-51R-A34R-07	3.05825	4.43523	5.12188	4.34818	4.5157	3.43496	3.76718	5.18434
TCGA-HD-A634-01A-11R-A28V-07	1.35423	1.00811	1.4597	1.74344	0.695721	0.95516	0.881832	4.66039
TCGA-CN-A49A-01A-11R-A24H-07	2.8904	1.20375	2.19519	2.84361	1.63408	1.89252	1.2096	5.95514
TCGA-IQ-7632-01A-11R-2081-07	1.70319	1.13914	1.202	1.0322	0.888714	1.7069	1.07047	4.47377
TCGA-D6-6827-01A-11R-1915-07	2.14435	5.29799	2.82334	1.69891	1.58598	1.99025	1.67515	5.88444
TCGA-P3-A5QF-01A-11R-A28V-07	2.75275	2.41036	3.25853	2.2097	1.86047	2.00795	1.91027	5.95525
TCGA-BA-A6DI-01A-11R-A30B-07	3.42808	2.12463	1.83957	1.91551	1.3082	3.02274	1.43922	5.24539
TCGA-CV-7424-01A-11R-2081-07	4.42191	2.50414	3.56813	3.4197	2.98351	2.9129	2.76264	5.33469
TCGA-CV-7235-01A-11R-2016-07	3.02084	3.42642	4.48277	4.50952	3.07045	3.66008	3.24826	6.11144
TCGA-CV-A6K2-01A-11R-A31N-07	4.53734	2.17517	3.23822	2.95396	1.6702	2.68366	1.94225	4.78205
TCGA-F7-A61V-01A-11R-A28V-07	3.87225	2.24851	1.92235	2.17275	1.86371	1.96085	1.79954	5.46951
TCGA-CV-6938-01A-11R-1915-07	6.13228	3.50601	4.97715	5.40831	3.55658	4.62879	3.23505	4.3568
TCGA-CQ-6219-01A-11R-1915-07	4.58121	3.12022	4.87842	4.58054	3.22724	3.62734	3.66401	5.22491
TCGA-CV-5434-01A-01R-1686-07	5.39794	3.32948	4.83574	2.8499	2.48301	3.98392	3.102	5.46075
TCGA-CV-A45Y-01A-11R-A24Z-07	4.63132	4.14554	4.41298	3.83309	3.62963	3.83316	3.54057	4.85832
TCGA-CV-5966-01A-11R-1686-07	5.29313	3.18018	4.71541	5.4593	2.70691	4.71142	2.27582	4.95409
TCGA-D6-A6ES-01A-12R-A31N-07	0.574605	1.82885	1.61944	0.930824	1.05091	0.215975	1.01633	3.63082
TCGA-CR-7376-01A-11R-2132-07	5.06816	4.62254	5.55328	5.17572	4.64736	5.43462	4.26008	4.06116
TCGA-BA-6872-01A-11R-1873-07	2.93946	2.50284	2.60348	2.08795	1.95522	2.697	1.41206	5.01764
TCGA-IQ-A6SH-01A-12R-A34R-07	2.75593	3.36165	3.43045	4.489	2.73329	2.67015	2.04342	5.13602
TCGA-CR-6470-01A-11R-1873-07	4.87607	4.6418	4.54533	4.86799	4.4837	3.65541	4.44329	6.55872
TCGA-CV-A460-01A-21R-A24Z-07	3.58672	4.29678	4.58851	4.67604	3.76918	2.84401	3.78344	5.52627
TCGA-UF-A7JF-01A-11R-A34R-07	1.17823	2.41866	3.49604	2.19144	1.27102	1.38733	1.29027	4.54188
TCGA-CN-6023-01A-11R-1686-07	5.86249	3.08805	4.69286	5.30362	4.673	4.15917	3.54555	5.34263
TCGA-CR-6477-01A-11R-1873-07	3.13232	3.70399	4.27526	2.69712	2.14796	3.28734	3.03463	4.94463
TCGA-QK-A6II-01A-11R-A31N-07	3.57154	1.65889	1.60157	2.34706	1.41433	1.7661	0.907345	4.46892
TCGA-CR-7389-01A-11R-2016-07	2.48237	2.66858	3.04022	2.61071	1.75752	3.20039	2.00686	4.56654
TCGA-CV-7180-01A-11R-2016-07	1.57035	1.1068	1.41626	1.60394	1.21452	1.25905	1.30098	4.38954
TCGA-CV-7406-01A-11R-2081-07	2.41234	1.55332	2.72631	1.45921	1.18914	2.45875	1.41517	5.3798
TCGA-BA-5555-01A-01R-1514-07	2.24916	2.77098	3.54933	3.15073	2.44949	2.63114	2.67996	5.91487
TCGA-F7-A61W-01A-11R-A28V-07	3.12385	1.73685	1.93756	1.53716	1.13346	3.68733	0.96423	5.61321
TCGA-CX-7219-01A-11R-2016-07	3.69774	3.76151	4.54939	3.60988	2.61377	3.65761	3.20584	4.79847
TCGA-UP-A6WW-01A-12R-A34R-07	2.82175	3.79993	4.04464	3.73126	2.89473	2.28072	2.55523	5.33555
TCGA-QK-A8Z8-01A-11R-A39I-07	2.03132	2.10217	2.01314	2.08307	1.48989	1.85432	1.4453	5.69612
TCGA-T2-A6X2-01A-12R-A34R-07	3.36223	3.10093	3.53174	3.94133	2.59917	3.54431	2.69506	5.77702
TCGA-4P-AA8J-01A-11R-A39I-07	3.01895	3.23756	3.8233	3.94398	3.19341	3.38866	2.55298	4.7481
TCGA-BA-5557-01A-01R-1514-07	3.93173	2.67806	4.87469	2.40022	2.31033	3.48315	1.94601	4.24467
TCGA-CR-7402-01A-11R-2016-07	2.37689	3.278	2.94447	3.17529	3.01439	3.00251	2.74492	6.56957
TCGA-CQ-6228-01A-11R-1915-07	2.09181	1.58909	3.30515	1.673	1.69744	1.64103	1.60487	6.19808
TCGA-CN-4737-01A-01R-1436-07	2.31842	2.53443	3.47856	2.03104	1.7583	2.73818	1.90735	5.04305
TCGA-UF-A7JD-01A-11R-A34R-07	2.95665	2.72574	3.21356	2.47521	1.57214	3.53893	1.74965	4.89896
TCGA-P3-A5Q6-01A-11R-A28V-07	1.99043	2.13842	2.74781	1.52267	1.33647	2.24619	1.67815	4.87723
TCGA-CV-7425-01A-11R-2081-07	5.47608	2.97543	3.37326	2.96976	2.95968	4.70735	2.78232	5.18147
TCGA-CN-6022-01A-21R-1686-07	3.08827	3.59389	4.52917	3.36107	2.56511	2.64605	2.90152	5.60228
TCGA-CR-6480-01A-11R-1873-07	3.58329	2.39662	2.92188	3.11664	2.98305	2.59021	2.58425	6.24056
TCGA-F7-8298-01A-11R-2403-07	4.79817	3.12452	3.30797	3.01432	1.90722	3.94964	1.74709	6.16239
TCGA-BA-4074-01A-01R-1436-07	2.31673	1.91842	3.19179	1.17409	1.32253	3.98523	0.858197	4.07971
TCGA-CN-6988-01A-11R-1915-07	1.98103	1.05678	1.33888	1.0417	1.20579	1.53678	1.00386	5.21764
TCGA-CV-A6JD-01A-11R-A31N-07	5.45958	3.60112	4.58654	5.51227	3.35895	4.67958	2.70205	4.63005
TCGA-F7-A50I-01A-11R-A28V-07	4.487	2.89908	3.03217	2.56094	1.84695	3.19717	2.24795	7.19508
TCGA-DQ-5630-01A-01R-1873-07	4.3344	3.88183	4.62552	3.74238	2.5549	3.76496	2.75909	5.73492
TCGA-D6-6823-01A-11R-1915-07	2.30376	2.10397	2.24124	1.66895	1.41771	2.6628	1.36782	5.51624
TCGA-CQ-5333-01A-01R-2403-07	4.32266	4.45465	5.48387	7.09348	4.7358	4.15651	3.3489	4.12404
TCGA-CV-7103-01A-21R-2016-07	2.44384	2.46525	3.22488	1.45362	1.64102	2.84105	2.40831	4.10877
TCGA-CV-A45R-01A-11R-A24H-07	5.173	2.74264	3.43782	3.18759	2.65014	3.40277	2.39555	4.8574
TCGA-CQ-5331-01A-02R-1873-07	4.74192	3.28365	4.15823	5.03709	3.56503	4.07347	3.43054	4.64942
TCGA-D6-A6EM-01A-21R-A31N-07	3.72658	4.06865	4.17164	5.94913	3.3132	4.11877	2.7684	4.5243
TCGA-CR-7372-01A-11R-2016-07	1.99166	2.61069	2.59035	1.95228	1.49692	2.37214	1.71615	4.96566
TCGA-T2-A6X0-01A-11R-A34R-07	6.11995	3.87023	4.20487	3.94094	3.96332	3.2035	3.172	7.30543
TCGA-HL-7533-01A-11R-2232-07	6.93903	2.63222	4.07224	4.60782	3.65421	9.29956	3.44488	5.50838
TCGA-H7-8502-01A-11R-2403-07	2.89335	2.34779	3.27347	3.04037	2.08063	3.03076	1.82954	5.99568
TCGA-BA-A8YP-01A-11R-A39I-07	2.30853	2.93985	4.07821	2.8221	1.67749	2.44506	1.91084	6.22216
TCGA-KU-A6H8-01A-21R-A34R-07	2.03242	1.92494	2.16714	3.01591	2.49508	1.57166	2.05524	3.85203
TCGA-CV-6950-01A-11R-1915-07	5.17305	2.26976	3.25324	2.45329	2.1514	5.58579	2.06997	4.90575
TCGA-CN-5370-01A-01R-2016-07	5.87715	4.17456	5.17477	5.62207	3.15734	5.71288	2.95303	5.17975
TCGA-CV-6933-01A-11R-1915-07	2.95289	2.02468	4.77934	1.78294	1.54979	2.95368	1.9585	6.23158
TCGA-UF-A718-01A-22R-A34R-07	3.11074	2.88819	3.01578	2.66454	2.61742	2.25538	2.34852	5.47551
TCGA-CR-5243-01A-01R-1514-07	3.67552	4.18726	3.69518	3.43705	3.12664	2.75356	3.29752	6.37007
TCGA-BB-4224-01A-01R-1436-07	1.91185	1.47101	3.10455	2.51918	1.23227	1.78908	1.17949	6.56579
TCGA-CV-A6JU-01A-11R-A31N-07	1.29393	1.92652	3.05356	3.56294	1.32074	1.30507	1.28551	5.56341
TCGA-CV-6937-01A-11R-2016-07	1.217	1.89841	2.97952	1.95202	1.91564	1.13133	1.24715	5.6992
TCGA-H7-8501-01A-11R-2403-07	5.3829	4.74957	5.84483	5.66019	4.57696	5.96514	3.74127	5.16474
TCGA-CV-7435-01A-11R-2132-07	3.18322	3.30293	4.42283	4.05777	2.21869	3.79638	2.65858	4.5316
TCGA-HD-A6HZ-01A-12R-A31N-07	3.79632	4.25651	3.90077	3.34447	3.25594	3.89175	2.65913	4.84152
TCGA-CV-A6JE-01A-11R-A31N-07	3.37245	3.99958	3.33634	5.25476	3.69828	2.73213	2.90218	4.5017
TCGA-CN-A6V6-01A-12R-A34R-07	4.56715	4.9759	4.50601	5.37431	4.91721	3.12228	4.03713	5.46746
TCGA-CR-6474-01A-11R-1873-07	3.84026	3.15336	3.8021	2.56816	1.92017	3.80737	2.69052	4.38936
TCGA-BA-5558-01A-01R-1514-07	2.9177	3.45162	3.66707	3.95205	3.01781	2.93156	2.57859	4.27747
TCGA-CR-7373-01A-11R-2016-07	5.2774	4.99202	4.48502	5.07133	3.59722	5.74905	3.05148	4.67086
TCGA-CR-7398-01A-11R-2016-07	2.40109	3.1711	3.76758	3.03372	1.89347	3.36504	1.88855	5.90032
TCGA-CV-7247-01A-11R-2016-07	2.11719	1.23176	1.94832	1.4058	1.04706	2.06786	1.00298	5.2141
TCGA-CV-7422-01A-21R-2081-07	5.8502	2.22972	3.97011	3.11022	2.49761	2.79519	2.65005	5.48066
TCGA-RS-A6TP-01A-12R-A34R-07	4.34145	3.01065	2.81761	4.71361	2.41704	2.47069	2.22267	5.98622
TCGA-CN-5369-01A-01R-1436-07	5.23113	3.46144	4.23403	3.88311	3.32244	4.35596	3.18222	5.21941
TCGA-CV-7250-01A-11R-2016-07	3.04656	2.11122	2.9586	2.87227	2.37812	1.69395	1.94751	4.71267
TCGA-BA-6868-01B-12R-1915-07	1.57623	1.67916	1.6492	1.97729	1.42992	1.43944	1.27555	5.93817
TCGA-CN-4731-01A-01R-1436-07	1.46246	1.16967	2.56275	2.51918	1.61314	2.20311	1.27525	5.77234
TCGA-DQ-5625-01A-01R-1873-07	5.93356	3.47156	4.52287	5.43203	3.05441	4.40204	3.6302	5.04768
TCGA-H7-7774-01A-21R-2081-07	2.70608	1.91169	2.51196	2.27908	2.18987	1.64277	1.98877	4.66513
TCGA-D6-6516-01A-11R-1873-07	4.15024	2.47053	3.20552	4.27985	2.56883	3.94172	2.38262	4.27305
TCGA-QK-A64Z-01A-11R-A30B-07	3.30767	2.20874	2.65774	2.63978	1.9181	2.97284	1.75732	4.83642
TCGA-BA-7269-01A-11R-2016-07	1.11592	1.82092	2.49133	1.73567	1.47129	1.37058	1.39819	4.29332
TCGA-CV-5440-01A-01R-1514-07	3.23	1.23582	2.60479	1.68148	1.30398	1.87361	1.33591	6.66633
TCGA-CV-A45W-01A-11R-A24Z-07	5.71917	3.65256	4.36182	4.33967	3.63502	4.08802	3.11436	5.77982
TCGA-CN-6989-01A-11R-1915-07	4.06431	4.57884	5.51991	2.38042	2.34322	3.91233	3.87308	4.96344
TCGA-CN-5359-01A-01R-1436-07	3.74657	3.77523	5.0538	4.28307	3.31124	4.06183	3.85009	4.92267
TCGA-CR-6481-01A-11R-1873-07	4.20957	4.55678	5.36495	5.39413	4.76448	4.55543	4.67009	5.38224
TCGA-CV-7446-01A-11R-2232-07	3.15693	2.96849	3.57158	2.83562	1.99758	2.65905	3.18129	5.5974
TCGA-CN-5365-01A-01R-1436-07	3.84389	2.32544	3.65994	3.58052	2.50801	4.06109	1.82131	5.36329
TCGA-F7-A624-01A-22R-A30B-07	6.25563	3.51889	5.37357	6.30455	4.74071	4.83184	3.70293	4.11521
TCGA-CQ-6220-01A-11R-1915-07	3.29716	2.19159	2.7295	2.95207	1.75583	3.16241	2.02159	5.32985
TCGA-CN-5363-01A-01R-1436-07	5.27494	3.2087	4.27515	4.30102	3.11077	5.32454	2.89858	5.88738
TCGA-T2-A6WX-01A-12R-A34R-07	5.61152	4.10857	5.27256	6.28408	4.45684	5.08226	3.98723	4.82991
TCGA-CQ-7068-01A-11R-2081-07	6.60127	4.13191	4.89509	6.34897	4.2815	4.88334	3.99161	5.48271
TCGA-CV-A6K1-01A-11R-A31N-07	2.00096	2.65136	2.50486	3.05915	1.73352	2.09681	1.90293	4.69543
TCGA-HD-7832-01A-11R-2132-07	4.37605	2.93741	4.00837	4.3974	2.32813	4.41555	2.16655	5.76797
TCGA-MZ-A6I9-01A-11R-A31N-07	1.55369	1.96584	2.03769	2.7747	2.3057	1.32171	1.55887	5.36674
TCGA-CV-7416-01A-11R-2081-07	3.08487	2.03139	4.03487	2.21388	1.4531	3.97446	1.64099	4.84009
TCGA-D6-8568-01A-11R-2403-07	3.40488	3.2493	2.94746	2.60674	1.99811	3.71667	1.8433	5.13343
TCGA-HD-8224-01A-11R-2403-07	4.00041	1.88639	3.67135	2.00436	1.63324	2.62023	1.90368	5.79242
TCGA-CQ-A4CG-01A-11R-A266-07	4.12915	1.75675	2.87586	2.27364	1.82532	3.51596	1.38799	5.31779
TCGA-CN-A49C-01A-11R-A24H-07	3.77368	2.44478	2.88587	2.55848	2.10538	2.43435	1.79283	6.16878
TCGA-D6-A6EQ-01A-11R-A31N-07	2.12092	3.1879	3.01572	2.93345	1.97818	2.14804	2.04369	4.15039
TCGA-CQ-A4C9-01A-11R-A24Z-07	3.59924	2.40271	3.19885	1.63229	1.31695	2.54281	1.47295	5.85283
TCGA-CR-7404-01A-11R-2132-07	4.86263	4.20865	4.36063	4.18564	3.5127	3.73425	3.78011	6.17036
TCGA-CR-7382-01A-11R-2132-07	6.34871	4.35121	5.45832	5.13185	3.25866	6.24332	3.38335	4.44751
TCGA-CV-7427-01A-11R-2081-07	6.29973	3.63106	4.21793	3.86807	2.98905	5.18538	3.12273	4.37015
